# Supplementary material for: Improving paediatric antimicrobial stewardship in remote and regional Queensland hospitals: development and qualitative evaluation of a tailored intervention for intravenous-to-oral antibiotic switching
Source: PubMed Central journal article supplement — BMJ Open. 2022 Dec 26;12(12):e064888. doi: 10.1136/bmjopen-2022-064888 (PMC9806007; doi:10.1136/bmjopen-2022-064888), 2022-12-26
Supplement: bmjopen-2022-064888.draft_revisions.pdf [file bmjopen-2022-064888.draft_revisions.pdf]

# BMJ Open

BMJ Open is committed to open peer review. As part of this commitment we make the peer review history of every article we publish publicly available.

When an article is published we post the peer reviewers' comments and the authors' responses online. We also post the versions of the paper that were used during peer review. These are the versions that the peer review comments apply to.

The versions of the paper that follow are the versions that were submitted during the peer review process. They are not the versions of record or the final published versions. They should not be cited or distributed as the published version of this manuscript.

BMJ Open is an open access journal and the full, final, typeset and author-corrected version of record of the manuscript is available on our site with no access controls, subscription charges or pay-per-view fees (<http://bmjopen.bmj.com>).

If you have any questions on BMJ Open's open peer review process please email [info.bmjopen@bmj.com](mailto:info.bmjopen@bmj.com)

# BMJ Open

## Improving paediatric antimicrobial stewardship: Development and qualitative evaluation of a tailored intervention for intravenous-to-oral antibiotic switching in children

|                               |                                                                                                                                                                                                                                                                                                                                                                                                                                                                                                                                                                                                                                                                                                      |
|-------------------------------|------------------------------------------------------------------------------------------------------------------------------------------------------------------------------------------------------------------------------------------------------------------------------------------------------------------------------------------------------------------------------------------------------------------------------------------------------------------------------------------------------------------------------------------------------------------------------------------------------------------------------------------------------------------------------------------------------|
| Journal:                      | <i>BMJ Open</i>                                                                                                                                                                                                                                                                                                                                                                                                                                                                                                                                                                                                                                                                                      |
| Manuscript ID                 | bmjopen-2022-064888                                                                                                                                                                                                                                                                                                                                                                                                                                                                                                                                                                                                                                                                                  |
| Article Type:                 | Original research                                                                                                                                                                                                                                                                                                                                                                                                                                                                                                                                                                                                                                                                                    |
| Date Submitted by the Author: | 17-May-2022                                                                                                                                                                                                                                                                                                                                                                                                                                                                                                                                                                                                                                                                                          |
| Complete List of Authors:     | Sharman, Leah; University of Queensland; University of Queensland<br>Avent, Minyon L.; Queensland Health; University of Queensland Centre<br>for Clinical Research (UQCCR)<br>Lyll, Vivian; The University of Queensland,<br>Fejzic, Jasmina; University of Queensland<br>Clark, Julia; Queensland Children's Hospital<br>Irwin, Adam; University Of Queensland Centre for Clinical Research;<br>Great Ormond Street Hospital for Children, Department of Paediatric<br>Infectious Diseases<br>Graham, Nicolette; Queensland Children's Hospital; Queensland<br>Children's Hospital, Pharmacy Department<br>van Driel, Mieke L; University of Queensland, Academic Discipline of<br>General Practice |
| Keywords:                     | QUALITATIVE RESEARCH, Protocols & guidelines < HEALTH SERVICES<br>ADMINISTRATION & MANAGEMENT, Infection control < INFECTIOUS<br>DISEASES, PAEDIATRICS                                                                                                                                                                                                                                                                                                                                                                                                                                                                                                                                               |
|                               |                                                                                                                                                                                                                                                                                                                                                                                                                                                                                                                                                                                                                                                                                                      |

SCHOLARONE™  
Manuscripts

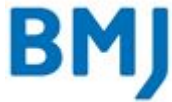

I, the Submitting Author has the right to grant and does grant on behalf of all authors of the Work (as defined in the below author licence), an exclusive licence and/or a non-exclusive licence for contributions from authors who are: i) UK Crown employees; ii) where BMJ has agreed a CC-BY licence shall apply, and/or iii) in accordance with the terms applicable for US Federal Government officers or employees acting as part of their official duties; on a worldwide, perpetual, irrevocable, royalty-free basis to BMJ Publishing Group Ltd ("BMJ") its licensees and where the relevant Journal is co-owned by BMJ to the co-owners of the Journal, to publish the Work in this journal and any other BMJ products and to exploit all rights, as set out in our [licence](#).

The Submitting Author accepts and understands that any supply made under these terms is made by BMJ to the Submitting Author unless you are acting as an employee on behalf of your employer or a postgraduate student of an affiliated institution which is paying any applicable article publishing charge ("APC") for Open Access articles. Where the Submitting Author wishes to make the Work available on an Open Access basis (and intends to pay the relevant APC), the terms of reuse of such Open Access shall be governed by a Creative Commons licence – details of these licences and which [Creative Commons](#) licence will apply to this Work are set out in our licence referred to above.

Other than as permitted in any relevant BMJ Author's Self Archiving Policies, I confirm this Work has not been accepted for publication elsewhere, is not being considered for publication elsewhere and does not duplicate material already published. I confirm all authors consent to publication of this Work and authorise the granting of this licence.

1  
2  
3  
4  
5  
6  
7  
8 Improving paediatric antimicrobial stewardship: Development and qualitative evaluation of a  
9  
10 tailored intervention for intravenous-to-oral antibiotic switching in children  
11

12 Leah S. Sharman PhD<sup>1,2</sup>, Minyon L. Avent PhD<sup>3,4</sup>, Vivian Lyall PhD<sup>1</sup>, Jasmina Fejzic PhD<sup>5</sup>,  
13  
14 Julia E. Clark PhD<sup>6,7</sup>, Adam D. Irwin PhD<sup>4,7</sup>, Nicolette Graham<sup>7,8</sup>, Mieke van Driel<sup>1</sup> MD PhD  
15  
16  
17

18  
19  
20 <sup>1</sup> General Practice Clinical Unit, Faculty of Medicine, University of Queensland, Brisbane,  
21 Qld, Australia.  
22

23  
24 <sup>2</sup> School of Psychology, Faculty of Health and Behavioural Sciences, University of  
25 Queensland, Brisbane, Qld, Australia.  
26

27  
28 <sup>3</sup> Queensland Statewide Antimicrobial Stewardship Program, Queensland Health, Brisbane,  
29 Qld, Australia.  
30

31  
32 <sup>4</sup> University of Queensland Centre for Clinical Research (UQCCR), Brisbane, Qld, Australia  
33

34  
35 <sup>5</sup> School of Pharmacy, Faculty of Health and Behavioural Sciences, University of  
36 Queensland, Brisbane, Qld, Australia.  
37

38  
39 <sup>6</sup> School of Clinical Medicine, Faculty of Medicine, University of Queensland, Brisbane, Qld,  
40 Australia.  
41

42  
43 <sup>7</sup> Infection Management and Prevention Service, Medical Division, Queensland Children's  
44 Hospital, Brisbane, Qld, Australia.  
45

46  
47 <sup>8</sup> Pharmacy Department, Queensland Children's Hospital, Brisbane, Qld, Australia.  
48  
49

50  
51 **Correspondence to:** Dr Leah Sharman, School of Psychology, McElwain Building,  
52 University of Queensland, St Lucia, QLD 4075, Australia. **E-mail:** l.sharman1@uq.edu.au  
53  
54

55  
56 **Word count:** 3507  
57  
58  
59  
60

## ABSTRACT

**Background:** Timely Intravenous (IV)-to-oral antibiotic switch for children is important for paediatric antimicrobial stewardship (AMS). However, low decision-making confidence and fragmentation of patient care can hamper implementation, with difficulties heightened regionally where AMS programs for children are lacking.

**Objectives:** The aim of this study was to develop and evaluate user-led creation and implementation of an intervention package for early IV-to-oral switching at seven regional Queensland hospitals.

**Method:** Guided by theory, a four-phase approach was used to: (i) develop multifaceted intervention materials; (ii) review materials and their usage through 15 stakeholders; (iii) adapt materials based on user-feedback; and (iv) qualitatively evaluate 20 health workers experiences at 6-months post-intervention.

**Results:** Content analysis of health worker and parent/guardian reviews identified the 'perceived utility of materials' and 'possible barriers to use'. 'Recommendations and strategies for improvement' provided adjustments for the materials that were able to be tailored to individual practice. Post-intervention interviews generated three overarching themes that combined facilitators and barriers to switching: (1) application of materials, (2) education and support, and (3) team dynamics. Overall, despite difficulties with turnover and problems with the medical hierarchy, interventions aided and empowered antibiotic therapy decision-making and enhanced education and self-reflection.

**Conclusions:** Despite structural barriers to AMS, offering tailored multifaceted interventions for switching from IV-to-oral antibiotics in paediatric patients was able to successfully inform and adjust practice across hospital teams in regional areas. Future AMS activities should be guided by users and provide opportunities for tailoring tools to practice setting and patients' requirements.

**Keywords:** antimicrobial resistance, antibiotic therapy, medical decision making, qualitative research, hospital medicine, paediatrics, regional, antimicrobial stewardship

## ARTICLE SUMMARY

### Strengths and limitations of this study

- Provides a theory-based approach to the development and evaluation of a user-led paediatric AMS intervention.
- Examines the perspectives of health workers and parents/guardians in the creation of materials to improve early paediatric IV-to-Oral antibiotic switching and their uptake.
- Provides perspectives for barriers and some solutions to improving comprehension of healthcare materials for Indigenous parents/guardians.
- Post-intervention qualitative interviews did not include parents/guardians or Indigenous health liaisons to understand the parent/guardian information leaflets uptake in practice.
- Although sampling regional, rural, and remote hospitals in Queensland, it could in future be expanded to incorporate a larger number of these sites to identify the variance between these hospital environments and professional perspectives.

## INTRODUCTION

Increasing antimicrobial resistance worldwide has prompted international development of antimicrobial stewardship (AMS) programs, with the goal of optimizing antibiotic use to limit resistance development. While one strategy for enhancing appropriate antibiotic use is the promotion of early intravenous (IV) to oral antibiotics transition, or “IV to oral switch” [1,2], these have yet to be uniformly adopted into national guidelines in many countries [3].

In 2011, Australia introduced AMS as a dedicated hospital accreditation standard and an incentive for AMS programs [4]. However, barriers to AMS program implementation include a lack of decision-making confidence, fragmentation of patient care across health practitioners, and access to AMS expertise [5]. These issues are frequently present in regional areas [6,7], with geographical isolation, small staff numbers, and less access to AMS expertise and support than urban areas [8].

Although Australia has seen a push for greater AMS programs nationally, there are some limitations within the measures commonly used or recommended in adult settings, which may not be translatable to paediatrics. This disparity has resulted in significant evidence gaps in infection burden surveillance, susceptibility patterns [9,10], and implementation of AMS activities [9,11]. Indeed, in their policy statement on AMS, the American Academy of Paediatrics Committee on Infectious Diseases and the Paediatric Infectious Diseases Society [12] include implementing a program specifically for the conversion of IV-to-oral antibiotic therapy in children. Thus, the aim of this research was to develop and evaluate a timely paediatric IV-to-oral AMS strategy in consultation with health workers and parent/guardians that optimized uptake and reduced barriers to use in remote and regional Queensland hospitals.

## METHOD

A combination of two conceptual theoretical frameworks (decision sampling framework [13] and person-based approach [14]), were used to develop and evaluate a multifaceted package of tailored interventions. Evaluation included stakeholders at seven Queensland regional and rural hospital sites comprising patient-guardians and diverse health practitioners, such as nurses, doctors, pharmacists, and Indigenous liaison officers. Here, we present the stepped phases of development, implementation, and evaluation of a paediatric IV-to-Oral switch program. The final resources used for the intervention can be found in the supplementary materials of [blinded for review].

### Ethics

Ethical approval for this research was granted by Children's Health Queensland Human Research Ethics Committee for all sites in this research (LNR/18/QRCJ/44322). All participants provided verbal and/or written consent before interviews and were able to remove consent at any point during the interview.

### Framework

The decision sampling framework presents optimal 'evidence-informed decisions' for intervention creation by using (i) the best available evidence, (ii) experts to evaluate and review the usefulness, practicality, and the contexts and intervention will be used in, and (iii) the consideration of values of intervention users and their patients to increase the use and impact of an intervention. The person-based approach, similarly, focuses on the development of interventions as concentrating on and accommodating perspectives of those who will use the intervention, ensuring ease of use and relevance. In designing an intervention, this framework encourages the use of consultation with experts and stakeholders as part of intervention development at multiple stages of the process to identify key challenges and evaluate components of the intervention from a user perspective.



1  
2  
3 Drawing on these two frameworks, the research involved four phases (see Figure 1):  
4  
5 (1) Resource development, that identified, reviewed, and created resources for  
6  
7 implementation; (2) a pre-intervention review of these resources; (3) adapting resources  
8  
9 based on user recommendations and implementation of the intervention materials; and (4) a  
10  
11 post-intervention evaluation of the intervention materials. Please refer to Additional File 1 for  
12  
13 a COREQ checklist of the qualitative phases.  
14  
15

16  
17 <Figure 1 here>  
18  
19

#### 20 Phase 1: Resource development

21  
22 An intervention package for paediatric AMS “switching” from IV-to-oral antibiotic  
23  
24 therapy was resourced by the research team from relevant literature through PubMed  
25  
26 searches (limited to English-language publications) and author libraries from 2014 to 2018.  
27  
28 AMS intervention materials reviewed were: guidelines for community acquired pneumonia  
29  
30 and skin and soft tissue infections, decision flow charts, medication tables, chart stickers, fact  
31  
32 sheets, lanyards, and a patient-guardian information leaflet that promoted timely IV-to-oral  
33  
34 conversion of antibiotic therapy. Further information on resource development can be found  
35  
36 elsewhere [blinded for review].  
37  
38  
39

#### 40 Phase 2: Pre-intervention review of resources

41  
42 A qualitative pre-intervention evaluation of these intervention resources by 15  
43  
44 multidisciplinary healthcare workers, eight parents/guardians, and five Aboriginal and Torres  
45  
46 Strait Islander health workers (including Indigenous Liaison Officers) from a regional and  
47  
48 rural hospital site was conducted. Parents/guardians and Indigenous Liaison Officers were  
49  
50 purposively sampled through invitation by local hospital coordinators. Healthcare workers  
51  
52 were recruited through snowball sampling. Individual semi-structured interviews were  
53  
54 conducted by an independent female qualitative research officer (VL) from the University.  
55  
56 However, where the researcher was not able to conduct the interview by phone, they were  
57  
58  
59  
60

1  
2  
3 conducted on-site by one of two local paediatric registrars (a male and female) trained in  
4  
5 interview techniques at two study sites. All participants were provided with an information  
6  
7 sheet that included the aims of the research and asked for their consent to take part in audio  
8  
9 recorded interviews. Participants were provided with a copy of the questions before the  
10  
11 interviews, which asked them to review the content and design of the intervention materials  
12  
13 and consider their relevance and utility for them personally, their practice, and/or that of their  
14  
15 colleagues, or other parent/guardians perspective. All interviews were digitally audio-  
16  
17 recorded, transcribed verbatim, and de-identified. The duration of interviews were not  
18  
19 recorded.  
20  
21  
22

23  
24 Analysis was conducted by two independent coders (VL, LS) with respective  
25  
26 backgrounds in Medicine and Psychology. Analysis used directed qualitative content  
27  
28 analysis, which was focused on the decision sampling framework to identify gaps in  
29  
30 information, practical implementation of the materials, and suggestions for improvement.  
31  
32

### 33 34 Phase 3: Adaption of resources and implementation

35  
36 Resources from phase 1 were adapted based on responses from the phase 2 semi-  
37  
38 structured interviews. Implementation for each site utilized the reviewed and adapted  
39  
40 package of intervention resources and were applied using a persuasive approach. This suite of  
41  
42 interventions provided healthcare workers with the opportunity to tailor the use of these tools  
43  
44 according to their practice setting and patient's requirements (see Table 1). A more detailed  
45  
46 discussion about this aspect of the study can be found in [blinded for review].  
47  
48  
49

### 50 51 Phase 4: Post-intervention Evaluation

52  
53 To explore whether and how the intervention materials were utilized as an AMS  
54  
55 strategy in paediatric patients, we again utilized semi-structured interviews with 20 health  
56  
57 practitioners from the seven study sites. These interviews were not able to include  
58  
59 parents/guardians. Participants were recruited through emails to hospital staff and via  
60

snowball sampling, with recruitment stopping when data saturation was reached. Interviews generally followed the same procedures as Phase 2, with a female qualitative research officer (LS) from the University conducting interviews over the phone and the same two registrars conducting in-person interviews at local sites where phone interviews were not possible. The 20 interviews analysed ranged between 5m and 32m in duration ( $M = 17.29m$ ). Participants were asked to reflect on their use of the materials and provide perceptions of the quality of the content (comprehension and relevance), effectiveness of the design of the materials, perceptions of usefulness in daily practice, and how supported they felt to effectively use the materials.

**Table 1.** Intervention materials and their placement on wards

| Material                                                 | Description                                                                                                                           | Type                      | Common Placements                 |
|----------------------------------------------------------|---------------------------------------------------------------------------------------------------------------------------------------|---------------------------|-----------------------------------|
| <i>?STOP Poster*</i>                                     | A simple IV to oral guide to aid in practitioner's decision-making.                                                                   | A3 Posters<br>A4 laminate | On walls and in medication charts |
| Flowchart*                                               | Detailed chart for identifying those eligible for IV to oral antibiotic conversion.                                                   | A3 Posters<br>A4 laminate | On walls and in medication charts |
| <i>Stickers on Paediatric Inpatient Medication chart</i> | Reminders to prompt a medication review.                                                                                              | Labels/<br>Stickers       | Medication charts                 |
| Guidelines                                               | For CAP and SSTIs including first line antibiotics and dosages, and another included comparable IV to oral antibiotics for switching. | A4 laminate               | In medication charts              |
| <i>Fact Sheet</i>                                        | A general IV to oral conversion fact sheet for healthcare workers.                                                                    | A4 handouts               | Given to health workers           |
| Education presentation                                   | One-hour presentation regarding AMS and the intervention.                                                                             | Presentation              | In-person and online              |
| <i>Patient-guardian information leaflet</i>              | Information for patient-guardians regarding switching from IV to oral antibiotic medication.                                          | Pamphlet                  | On ward or in the pharmacy        |
| <i>Patient-guardian video</i>                            | A 10-minute video presented by an Indigenous doctor regarding switching from IV to oral antibiotic medication for patient-guardians.  | Video                     | Online                            |

*Note:* \* = site choice of wall placement; IV = intravenous, CAP = community acquired pneumonia, SSTI = skin and soft tissue infection, AMS = antimicrobial stewardship

Thematic analysis for this phase was conducted by two independent coders (LS, JF) with different health backgrounds (Psychology and Pharmacy). Analysis used an essentialist approach that was reflexive and iterative to identify themes within the data [16,17]. Themes were generated from codes based on underlying constructs with a focus on implementation of the materials to daily practice, support to use the materials, and the effectiveness of the materials. Consensus on themes was achieved after discussion and refinement by coders.

## RESULTS

### Phase 2: Pre-intervention Review

Demographics for Phase 2 and 4 are shown in Table 2. Results for phase 2 identified gaps in information and practical implementation of the intervention materials interviews and are presented in Table 3.

**Table 2.** Pre and post intervention participant demographics

|                                | Pre-intervention (phase 2) |                 | Post-intervention (phase 4) |                 |                                  |
|--------------------------------|----------------------------|-----------------|-----------------------------|-----------------|----------------------------------|
|                                | <i>N</i>                   | % <i>Female</i> | <i>N</i>                    | % <i>Female</i> | <i>Mean time in current role</i> |
| Registered Nurse               | 4                          | 75%             | 5                           | 100%            | 5.7 years                        |
| Pharmacist                     | 3                          | 67%             | 6                           | 100%            | 8.5 years                        |
| Paediatric Director/Consultant | 4                          | 25%             | 1                           | 100%            | 3 years                          |
| Paediatric Registrar           | 1                          | 100%            | 4                           | 75%             | 1.3 years                        |
| Junior Resident                | 3                          | 67%             | 3                           | 67%             | 1.3 years                        |
| Indigenous health worker       | 5                          | 60%             | 1                           | 0%              | 1 years                          |
| Parent/guardian                | 8                          | 88%             | 0                           | -               | -                                |

The materials were viewed as having some perceived utility, particularly to healthcare workers (see Table 3). For healthcare workers the materials were seen as: accessible and direct information resources, able to assist with decision making confidence, helpful learning tools or prompts, and able to support communication between multidisciplinary teams. Carers who evaluated the patient-guardian information leaflet felt it could empower them to ask questions about treatment and felt more widely informed about doctors' decision making. On

1  
2  
3 the other hand, Indigenous health workers felt that there were multiple barriers to use the  
4 patient-guardian leaflet for these regional and rural areas. It was noted that low literacy and  
5 health literacy would mean few in their community would be able to understand the  
6 information leaflet. Among other things, the cultural diversity of Aboriginal and Torres Strait  
7 Islander peoples, distrust of Western healthcare, differences in the way knowledge is passed  
8 on (e.g., visually), and the different dynamics of living spaces among these peoples  
9 highlighted that there was no 'one size fits all' approach.

### 10 11 12 **Phase 3: Adaptation**

13  
14  
15  
16  
17  
18  
19  
20  
21  
22  
23  
24  
25  
26  
27  
28  
29  
30  
31  
32  
33  
34  
35  
36  
37  
38  
39  
40  
41  
42  
43  
44  
45  
46  
47  
48  
49  
50  
51  
52  
53  
54  
55  
56  
57  
58  
59  
60

New resources were developed based on the feedback from Phase 2. These included a patient video to address where English was not a first language for parents/caregivers and for Aboriginal and Torres Strait Islander patients where liaison officers advocated for more opportunities for visual learning. This video was led and produced an AMS pharmacist in collaboration with a regional Indigenous medical doctor to meet the needs of the Aboriginal and Torres Strait Islander communities. An online education video was also developed by a paediatric infectious disease specialist and AMS pharmacist to upskill clinicians in the management of acquired pneumonia and skin and soft tissue infections as well as provide guidance for timely IV to oral conversion.

### 43 44 45 **Phase 4: Post-intervention**

46  
47  
48  
49  
50  
51  
52  
53  
54  
55  
56  
57  
58  
59  
60

Overall, three major themes were found in the data. See table 4 for example quotes by themes.

#### 51 52 53 54 55 56 57 58 59 60

#### Application of materials

*Utility of decision-aids.* Across participants, there were generally positive views about the impact of the materials, particularly the design of the materials and how they supported decision making.

**Table 3.** Facilitators, barriers, and recommendations for change to encourage IV to oral switch intervention utilization

| Material                                                                    | Perceived Utility of Materials                                                                                                                                                                                                                                                                                                                                                                                                                               | Possible Barriers to Use                                                                                                                                                                                                                                                                                                                                                                                                                                                                                              | Recommendations and Strategies                                                                                                                                                                                                                                                                                                                                                                                                                                                                                                                           |
|-----------------------------------------------------------------------------|--------------------------------------------------------------------------------------------------------------------------------------------------------------------------------------------------------------------------------------------------------------------------------------------------------------------------------------------------------------------------------------------------------------------------------------------------------------|-----------------------------------------------------------------------------------------------------------------------------------------------------------------------------------------------------------------------------------------------------------------------------------------------------------------------------------------------------------------------------------------------------------------------------------------------------------------------------------------------------------------------|----------------------------------------------------------------------------------------------------------------------------------------------------------------------------------------------------------------------------------------------------------------------------------------------------------------------------------------------------------------------------------------------------------------------------------------------------------------------------------------------------------------------------------------------------------|
| Eligibility<br>Flowchart And<br>Suitable Agents                             | <ul style="list-style-type: none"> <li>- Assisting Junior doctors with decision making</li> <li>- A direct guideline and resource that will impact practice</li> <li>- Affirm confidence in decision-making</li> <li>- Formalized the approach to switching</li> <li>- Accessible and easy to follow</li> </ul>                                                                                                                                              | <ul style="list-style-type: none"> <li>- May have too many options that could be minimized</li> <li>- Exclusion criteria may be too limited</li> <li>- Suitable agent chart did not adequately address important barriers to oral antibiotics, such as tablet vs liquid dosage and taste</li> </ul>                                                                                                                                                                                                                   | <ul style="list-style-type: none"> <li>- The colours could be more obvious to simplify use of the flowchart</li> <li>- Increase readability of the by asking simpler questions</li> <li>- Attached to pharmacist files and doctor's charts.</li> </ul>                                                                                                                                                                                                                                                                                                   |
| ?Stop Guideline                                                             | <ul style="list-style-type: none"> <li>- Useful as a quick review guide</li> <li>- Visibility of a guideline would reduce anxiety for guardians wanting to continue IV antibiotics</li> <li>- Nurses felt they could use it to prompt doctors and to gain knowledge about administered treatments</li> <li>- Increases decision-making confidence among Junior doctors</li> <li>- Bright colours and acronym were easy to read and easy to follow</li> </ul> | <ul style="list-style-type: none"> <li>- Potentially limited decision making for further evaluations, like which oral doses to switch to and the timing of those doses</li> <li>- Some information suggesting external consultation of infectious diseases could delay important decision making</li> <li>- Doesn't address barriers to switching, such as children's reluctance to take oral medications</li> </ul>                                                                                                  | <ul style="list-style-type: none"> <li>- Could consult a more senior medical officer, rather than infectious diseases</li> <li>- Some improvements to the colours, such as using neutral colours not associated with emergency</li> <li>- copies of the guideline in the medication section of a patients' chart</li> <li>- Target nurses where they would see them most, i.e. near medications</li> </ul>                                                                                                                                               |
| Lanyard With<br>Guideline                                                   | <ul style="list-style-type: none"> <li>- Interns felt they would refer to the lanyard frequently if it had the ?STOP Guideline</li> <li>- Useful for easy access when a physical poster is unavailable</li> </ul>                                                                                                                                                                                                                                            | <ul style="list-style-type: none"> <li>- Some felt they had too many lanyards and it wouldn't be used</li> </ul>                                                                                                                                                                                                                                                                                                                                                                                                      | <ul style="list-style-type: none"> <li>- Distribute lanyards to all paediatric staff</li> </ul>                                                                                                                                                                                                                                                                                                                                                                                                                                                          |
| Patient Chart<br>Stickers                                                   | <ul style="list-style-type: none"> <li>- Important prompt to encourage timely reviews of clinical decisions</li> <li>- Support communication between team members</li> <li>- Encourages multi-disciplinary decision-making</li> </ul>                                                                                                                                                                                                                        | <ul style="list-style-type: none"> <li>- Not able to be used on an integrated electronic medical record</li> </ul>                                                                                                                                                                                                                                                                                                                                                                                                    | <ul style="list-style-type: none"> <li>- Consider adjusting the black text on red sticker to a yellow sticker for readability and attention</li> <li>- Add to patient medical charts</li> </ul>                                                                                                                                                                                                                                                                                                                                                          |
| Fact Sheet                                                                  | <ul style="list-style-type: none"> <li>- Helpful as a learning tool for new staff, students, and junior doctors</li> <li>- Helping staff understand best practice</li> </ul>                                                                                                                                                                                                                                                                                 |                                                                                                                                                                                                                                                                                                                                                                                                                                                                                                                       | <ul style="list-style-type: none"> <li>- Should be available electronically with reference links to support further reading</li> <li>- Place strategically in ward to encourage staff and student education</li> </ul>                                                                                                                                                                                                                                                                                                                                   |
| Patient-Guardian<br>Information<br>Leaflet                                  | <ul style="list-style-type: none"> <li>- Something tangible for parents to take home and read through, rather than be overloaded with information</li> <li>- Carers felt they were well informed and provided peace of mind about doctors decisions</li> <li>- Carers felt empowered and that they were enabled to ask questions about treatment</li> </ul>                                                                                                  | <ul style="list-style-type: none"> <li>- Low literacy and healthcare illiteracy for some carers may make comprehension difficult</li> <li>- Carers felt the information was important and the terminology was easy to understand</li> <li>- Lack of information about the side-effects of IV and oral antibiotics</li> <li>- Information would be best received once their child was settled in the paediatric ward</li> </ul>                                                                                        | <ul style="list-style-type: none"> <li>- Provide a quick summary of the sheet's main message at the front</li> <li>- Use more simplistic language and reduce the information to one page</li> <li>- More clarity and detail around the side-effects of medication types</li> <li>- 50% wanted to read it themselves, others wanted someone to talk them through it</li> </ul>                                                                                                                                                                            |
| Indigenous<br>Perspectives Of<br>Patient-Guardian<br>Information<br>Leaflet | <ul style="list-style-type: none"> <li>- This sheet would be ok for people with good literacy</li> </ul>                                                                                                                                                                                                                                                                                                                                                     | <ul style="list-style-type: none"> <li>- Impact of low literacy, numeracy, and health literacy in understanding the content</li> <li>- "Aboriginal people are a lot more visual"</li> <li>- Diversity of Aboriginal and Torres Strait Islander Peoples and there not being a 'one size fits all'</li> <li>- Distrust in Western medicine could make them reluctant to give any antibiotics</li> <li>- Dynamics of housing and crowded living spaces could impact how medications are taken out of hospital</li> </ul> | <ul style="list-style-type: none"> <li>- Using culturally appropriate language, images, and colours</li> <li>- Include 'what, why, how' of antibiotic use and side effects of IV vs oral</li> <li>- Acknowledge traditional medicines and their potential role</li> <li>- Increase visual representations of the content and provide clear verbal explanations "You need to explain things to our mob...[they] won't walk around with paper"</li> <li>- Using Indigenous people invested in Indigenous health to design and develop materials</li> </ul> |

1  
2  
3           *Memorable and simple.* Each of the materials varied in their frequency and popularity  
4  
5 of use, but the use of materials that were eye-catching, memorable, and simple to use were  
6  
7 the most often utilized. This was primarily true for the ?STOP chart and the yellow chart  
8  
9 stickers for antibiotic review. The ?STOP chart in particular was the most favoured material  
10  
11 across all health disciplines.  
12  
13

14  
15           *Targeted locations.* Strategic placement of the materials was an important factor for  
16  
17 all participants to easily access, engage with, and remember materials for decision-making.  
18  
19 Thus, location and convenience of materials was paramount to success of the intervention.  
20  
21 Participants reported remembering and utilizing charts and posters placed in hand-over  
22  
23 rooms, clinical rooms, treatment rooms, nurses' stations, within patient charts, next to  
24  
25 computers, or as online bookmarks. In these high-traffic and relevant areas, they posed as a  
26  
27 reminder about the importance of antibiotic switching and could also aid in decision-making.  
28  
29  
30

31  
32           *Understanding patients' needs.* Factors of patients and their caregivers also  
33  
34 influenced decisions to use (or not use) the materials. For example, patient-guardian leaflets  
35  
36 were utilized intermittently, with some finding them useful adjuncts to delivering face-to-face  
37  
38 advice with patient-guardians, and for others, the materials were most useful with complex  
39  
40 patients. However, some paediatric teams felt they did not need the switching materials  
41  
42 because their patients were not complex enough or where they had already switched  
43  
44 antibiotics to oral within 24-48 hours.  
45  
46

#### 47 48 Education and support

49  
50           *Updating and reinforcing knowledge.* Participants described the materials as  
51  
52 supporting education and training among staff members unfamiliar with AMS, as well as  
53  
54 their use as reminders of what antibiotics are appropriate and how to effectively switch from  
55  
56 IV to oral. Further, doctors and pharmacists felt the presence of the materials helped to  
57  
58  
59  
60



1  
2  
3 facilitate more discussion around AMS and to solidify prior knowledge regarding appropriate  
4  
5 antibiotic treatment.  
6  
7

8         *Familiarity.* Familiarity with the content of the switching guides was expressed as  
9  
10 necessary to enable effective use of those guides. Having departmental and executive support  
11  
12 to understand the information in the materials was described as central to this process.  
13  
14 However, knowledge about the types of materials available or their whereabouts on the ward  
15  
16 were not always available to staff. In particular, difficulties arose regarding the video created  
17  
18 for Aboriginal and Torres Strait Islander Peoples, which was also available as an audio-visual  
19  
20 option for other patient-guardians. Participants reported not utilizing this video, primarily  
21  
22 because they were not aware of it. However, those who were aware either did not know how  
23  
24 to access it, or due to technological constraints, could not provide the video as a resource to  
25  
26 patient-guardians.  
27  
28  
29

30  
31         *Reminders.* Reminders were often suggested as the best way to prompt continued use  
32  
33 of the materials, in the form of education and simple emails. It was also suggested that the  
34  
35 strategy of in-person education used within this study was a persuasive prompt for AMS and  
36  
37 use of materials to aid switching decision-making.  
38  
39  
40

#### 41 Team Dynamics

42  
43         *Empowering staff and changing practice.* Both junior and senior staff felt the  
44  
45 materials were empowering and helpful for junior medical and nursing practitioners in  
46  
47 presenting a decision to a senior staff member. Ultimately, several participants commented  
48  
49 that the use of the materials had influenced their own or their team members' practice in  
50  
51 thinking and acting more proactively about switching from IV to oral antibiotics within  
52  
53 paediatric care.  
54  
55  
56  
57  
58  
59  
60



**Table 4.** Post-intervention themes and example quotes

| Theme                    | Sub-theme                              | Example quote                                                                                                                                                                                                                                                                                                                                                                                                                                                                                                                                                                                                                                                                                                                                       |
|--------------------------|----------------------------------------|-----------------------------------------------------------------------------------------------------------------------------------------------------------------------------------------------------------------------------------------------------------------------------------------------------------------------------------------------------------------------------------------------------------------------------------------------------------------------------------------------------------------------------------------------------------------------------------------------------------------------------------------------------------------------------------------------------------------------------------------------------|
| Application of materials | Utility of decision-aids               | <i>"Yeah especially in regards to suitability whereby you know the patient has got a specific disease like a cellulitis that they cannot or have not in the past ... Yeah it's good because it gives you a clear guide for using another agent."</i> (Pharmacist, regional)                                                                                                                                                                                                                                                                                                                                                                                                                                                                         |
|                          | Memorable and simple                   | <i>"Yes I'd say the yellow sticker was the best because it was bright and it's hard to miss on the chart so it was kind of just a prompt for them when they were reviewing the chart."</i> (Pharmacist, rural)<br><br><i>"I think just because it was straightforward and just easy, I think the clinicians they refuse to cut guidelines. I think the flow chart just made a lot more sense, it's easy."</i> (Registrar, rural)                                                                                                                                                                                                                                                                                                                    |
|                          | Targeted locations                     | <i>"They were definitely strategically placed to not be overwhelmed but be in places where you are thinking about prescribing antibiotics."</i> (RN, remote)                                                                                                                                                                                                                                                                                                                                                                                                                                                                                                                                                                                        |
|                          | Understanding patients' needs          | <i>"...it was a way for me to just, you know, add-on to the counselling... Rather than just saying, 'Take 5 mill's four times a day' ... it gave a couple of other talking points to go through the leaflet. Just to make sure they knew how long it had to go on for, what to do if they needed to go back to see the doctor again and that sort of thing."</i> (Senior Pharmacist, rural)<br><br><i>"I feel that in the clinical situations in this hospital we haven't been requiring the flow chart much over the last few months. And that's on the basis that our consultants are already doing quite well in terms of switching antibiotics or ceasing antibiotics already before the flow chart was given to us."</i> (Registrar, regional) |
| Education and support    | Updating and reinforcing knowledge     | <i>"...we did that to help flag and get the discussions around antimicrobials and paediatrics happening all around this time. So for us it was good to do that and raise a bit more awareness on the type of medications they were prescribing and you know whether it was matching guidelines..."</i> (Senior pharmacist, rural)<br><br><i>"... it did allow more open conversations with other people because there was a resource there. So in terms of helping me explicitly make the same decisions probably not a lot of help. But in terms of facilitating discussions with other people about the same decision making, very helpful."</i> (Registrar, rural)                                                                               |
|                          | Familiarity                            | <i>"You need to be familiar with it so I have familiarized most of the nursing staff with it at changeover or when they're on shift. But if you are familiar with it it's great especially considering that some of the nurses are having more contact time than say the medical staff will so it's giving them a bit more confidence."</i> (Senior Pharmacist, regional)<br><br><i>"I didn't know there was a video available so I would not expect that the rest of my staff knew..."</i> (NUM, rural)                                                                                                                                                                                                                                            |
|                          | Reminders                              | <i>"[an AMS practitioner] came and spoke with us ... and she came back a second time as well so she came and did some education with the doctors and then came and did some education with the nurses. I think that's helpful."</i> (NUM, rural)                                                                                                                                                                                                                                                                                                                                                                                                                                                                                                    |
| Team Dynamics            | Empowering staff and changing practice | <i>"[It] gives me sort of some confidence to ask about changing to oral."</i> (RMO, rural)<br><br><i>"Yes, definitely and I noticed a few times they would fax through an antibiotic request to pharmacy that would have the sticker on it and then [for] the dispensing pharmacist that would be a prompt to them to say 'oh okay maybe I need to call about this to supply more' before I supply it."</i> (AMS Pharmacist, rural)                                                                                                                                                                                                                                                                                                                 |
|                          | Multi-disciplinary engagement          | <i>"... it was good that it was so inclusive, quite often we've done things where it's only just been nurses ... it's been their full responsibility. But having that whole procedure so if we didn't pick it up the doctors hopefully did, or the pharmacists will come through and do it."</i> (RN, rural)                                                                                                                                                                                                                                                                                                                                                                                                                                        |
|                          | Knowledge and experience               | <i>"So even if you're pointing out guidelines or you're pointing out resources ... it may be that the person who makes all the decisions just makes their own decision based on their own experience or their own opinion a lot of the time. So I don't, it's my impression that often my more senior, my consultants did not appreciate, they don't appreciate the guidelines..."</i> (Registrar, remote)<br><br><i>"So I just didn't know if we, there was any point in us actually using the resource because it was just something that we already knew."</i> (NUM, rural)                                                                                                                                                                      |
|                          | Transience                             | <i>"Out here we have a very transient medical population, and our nursing staff change quite a bit as well. Probably more than most departments and I think that that is part of the problem, I'm the only consistent person that's been here in the last twelve months."</i> (Registrar, remote)                                                                                                                                                                                                                                                                                                                                                                                                                                                   |

1  
2  
3 *Broad engagement.* Some participants felt the broad engagement of different health  
4 practitioners helped to ensure good AMS practice across patient care.  
5  
6

7  
8 *Prior experience.* However, difficulties were also noted in engaging material uptake  
9 particularly among senior doctors/consultants. Participants echoed that for those senior  
10 healthcare workers, they were less likely to utilize the available guidelines and instead base  
11 their decisions on prior knowledge and experience.  
12  
13  
14  
15

16  
17 *Transience.* Lack of support and engagement from some sites created difficulties in  
18 appropriate use of the materials. Notably, all health practitioner groups reported that not  
19 having pharmacists on the ward or a lack of engagement from pharmacy was a constraint on  
20 effectively employing the intervention. This limitation was not always due to a pharmacist's  
21 lack of awareness of the intervention, but rather due to suboptimal pharmacy presence on the  
22 ward owing to staffing issues and ward sizing. Similarly, across all participants, the main  
23 explanation for a lack of engagement with the materials was related to staff turn-over or low  
24 staff numbers that involved constantly re-training new staff or the need for more support.  
25  
26  
27  
28  
29  
30  
31  
32  
33  
34  
35

## 36 **DISCUSSION**

37  
38 This research used a decision-sampling framework and person-based approach to  
39 develop and evaluate a multifaceted intervention package for improved timely and safe  
40 switching from intravenous-to-oral antibiotics in children. The four-phase approach used in  
41 this research was successful in guiding the creation, review, adjustment, and evaluation of  
42 materials through a user-led focus. The initial review process provided wide-ranging  
43 feedback regarding the efficacy of the materials, and importantly provided an avenue for  
44 users to make suggestions for the materials that were tailored to their own sites, teams, and  
45 knowledge. The most extensive feedback was provided by Indigenous health workers who  
46 recognized that the parent/guardian information leaflet was unlikely to have the intended  
47 impact among many Aboriginal and Torres Strait Islander parent/guardians. This was due to  
48  
49  
50  
51  
52  
53  
54  
55  
56  
57  
58  
59  
60

1  
2  
3 a variety of differences, and most pronounced of those was the identification that their  
4 communities would be more likely to learn and pass on knowledge visually and through  
5 conversation in culturally appropriate language. Subsequently, the materials were adjusted  
6 based on feedback and an Indigenous paediatric medical doctor lead the creation of a video  
7 providing culturally appropriate information regarding antibiotic switching.  
8  
9  
10  
11  
12  
13  
14

15 After 6-months of using the intervention materials, evaluations from various health  
16 practitioners revealed three overarching themes regarding the intervention and decision-aids:  
17 the application of materials, education and support, and team dynamics within and between  
18 hospitals. Overall, the intervention materials were viewed as aiding and empowering  
19 antibiotic therapy decision-making, assisting clinical decisions among all participants, and  
20 were particularly helpful at supporting junior doctors. Providing decision-making support to  
21 junior doctors, nurses, and pharmacists increased their individual capacity to influence  
22 antibiotic decision-making. This increased professional confidence and knowledge is likely to  
23 lead to more proactive attitudes and switching behaviours, where previously there has been  
24 resistance [16,17]. Of the physical supporting material, while the most popular material was  
25 the *?STOP poster*, most were seen as helpful for making switching decisions, or for  
26 communicating them to other healthcare workers and patient guardians. Importantly, many  
27 participants felt that the intervention increased their knowledge of AMS practices, their  
28 ability to educate others, empowered them or others to make decisions (including presenting  
29 decisions to seniors), and assisted with AMS practice change. A key to their engagement  
30 appeared to be the presence of materials in various strategic places, such as placement in  
31 medical charts and pinned on walls. Having materials available at the most impactful  
32 locations meant that AMS was conveniently visible and could be kept in mind during  
33 prescribing, and overall, that switching information was memorable to key healthcare  
34 workers.  
35  
36  
37  
38  
39  
40  
41  
42  
43  
44  
45  
46  
47  
48  
49  
50  
51  
52  
53  
54  
55  
56  
57  
58  
59  
60

1  
2  
3 Similar to previous research, the major barriers to uptake and engagement with the  
4 intervention were structural [5,7]. Most hospital sites noted difficulties with the hierarchy of  
5 medical engagement. For some, there were difficulties with high turnover of consultants and  
6 senior medical staff, such that medical teams did not have consistent leadership and the  
7 support to utilize interventions. This was also recognized concerning pharmacy support, with  
8 similar issues regarding lack of support stemming from high turnover or smaller wards at  
9 regional hospitals [7,17]. For others there was opposition, or a lack of appreciation, of the  
10 guidelines and materials from senior consultants who tended to preference their knowledge  
11 and experience over formal guidelines [16,18]. While it is unclear whether this practice  
12 influenced others, it may lead to reduced confidence, particularly among junior doctors, in  
13 making or presenting switching decisions to senior consultants.  
14  
15  
16  
17  
18  
19  
20  
21  
22  
23  
24  
25  
26  
27  
28

29 Key barriers to implementation of AMS practices in rural and regional Australia, and  
30 globally, have been identified as a lack of access to AMS support, education and training, and  
31 difficulties attracting and retaining staff, particularly staff with AMS expertise [5–7,17].  
32 Promisingly, our results show that access to tailored AMS support and appropriate resources  
33 can improve education and increase internal training of AMS practices across a broad array  
34 of health practitioners. While staff retention was still identified as a problem in regional  
35 areas, the impact of staff turnover was lessened by broad training and support to health  
36 practitioners at multiple levels, including registered nurses, junior resident medical officers,  
37 pharmacists, and registrars.  
38  
39  
40  
41  
42  
43  
44  
45  
46  
47  
48  
49

### 50 **Strengths and limitations**

51  
52 Limitations of our study were the small number of participating stakeholders and lack  
53 of input from patient guardians and carers during the post-intervention evaluation (Phase 4).  
54 Nevertheless, the interviewees were recruited from a range of regional areas, professions  
55 (including nurses and pharmacists), and are representative of a multidisciplinary team  
56  
57  
58  
59  
60

1  
2  
3 involved in caring for sick children. This approach shed light on the experiences of health  
4 workers in their preferences for materials and how those materials were used to aid antibiotic  
5 IV-to-oral switching by varying discipline and health context. Furthermore, although  
6 Aboriginal and Torres Strait Islander Liaison Officers provided feedback in the initial phases  
7 of the project, they were not included in the post-evaluation as they were not involved in  
8 delivery of direct patient care, treatment decisions, and the use of the intervention materials.  
9  
10 However, doing so would have provided further insight regarding how the Indigenous  
11 patient-guardian video could have affected patient care if it was used. A secondary pre-  
12 intervention evaluation of stakeholders following adaption of the resources in Phase 3 would  
13 also likely have assisted with understanding barriers to access the newer materials, like the  
14 video. This may have identified further avenues for education regarding Indigenous  
15 patient/guardians that could have been included in health worker education.  
16  
17  
18  
19  
20  
21  
22  
23  
24  
25  
26  
27  
28  
29  
30

31 Although our study was conducted in rural and regional hospitals in one Australian  
32 state, we believe the findings are relevant for other settings in Australia and within similar  
33 health systems worldwide. Notably, a strength of our study is the involvement of local  
34 clinicians in the pre- and post-intervention evaluation, which may enable sustainability of the  
35 intervention. In particular, this study utilized a package of interventions which provided  
36 health workers with the opportunity to tailor the available tools to their practice setting and  
37 patient's requirements, which is more realistic of a real-world situation and multifaceted  
38 approach more likely to be effective [19,20]. Importantly, improving antibiotic prescribing  
39 and management at the point of care requires complementary strategies: (1) changing  
40 clinician behaviour and (2) educating patients and families about the role of antibiotics in  
41 medical care and their own wellbeing [21].  
42  
43  
44  
45  
46  
47  
48  
49  
50  
51  
52  
53  
54  
55  
56  
57  
58  
59  
60

## Conclusions and implications

When guided by local clinicians and stakeholders, offering multifaceted intervention package to facilitate a timely switch from IV-to-oral antibiotic therapy in paediatric patients is successfully able to inform and adjust practice across hospital teams. Although more needs to be done to ensure all healthcare workers can embrace and support new interventions in a hospital setting, another main and not easily addressable issue remains the lack of sufficient long-term staff and their perpetually high turnover in regional hospitals. This is a major barrier to uptake in the long term. Future studies should explore how these interventions can be embedded within the healthcare infrastructure of a hospital and rely less on championship by individual staff.

## Declarations

### Availability of data and materials

The datasets used and analysed during the current study are available from the corresponding author on reasonable request.

### Conflict of interest

None.

### Funding

This work was supported by a Children's Hospital Foundation grant (50232). The Children's Hospital Foundation had no involvement in any aspect of the research or decision to submit this manuscript for publication.

### Author Contributions

The study was led by MA with MvD, JC, AI, and NG contributing to the conception of the study. MA reviewed the articles and extracted information for review and creation of resources. VL was responsible for the pre-intervention interviews, these were analysed by VL and LS. MA and MvD adapted resources from the pre-intervention interview comments. Post-intervention interviews were completed by LS and analyses was completed by LS and JF. The manuscript was led and written by LS. All authors approved the final manuscript as submitted and agree to be accountable for all aspects of the work in ensuring that questions related to the accuracy or integrity of any part of the work are appropriately investigated and resolved.

### Acknowledgements

We express our gratitude to Dr Andree Wade and Dr Gary Dyari Wood who generously conducted interviews. We are grateful to the health practitioners, Indigenous liaison officers and patient-guardians who generously shared their views and time with us at early stages of this research, providing valuable contributions.

## References

- 1 Cyriac JM, James E. Switch over from intravenous to oral therapy: A concise overview. *J. Pharmacol. Pharmacother.* 2014. doi:10.4103/0976-500X.130042
- 2 Mertz D, Koller M, Haller P, *et al.* Outcomes of early switching from intravenous to oral antibiotics on medical wards. *J Antimicrob Chemother* Published Online First: 2009. doi:10.1093/jac/dkp131
- 3 Kopsidas I, Vergnano S, Spyridis N, *et al.* A survey on national pediatric antibiotic stewardship programs, networks and guidelines in 23 European countries. *Pediatr Infect Dis J* 2020;**39**:E359–62. doi:10.1097/INF.0000000000002835
- 4 Australian Commission on Safety and Quality in Health Care. *National Safety and Quality Health Service Standards*. 2nd ed. Sydney: : ACSQHC 2021.  
<http://www.safetyandquality.gov.au/wp-content/uploads/2011/09/NSQHS-Standards-Sept-2012.pdf>.
- 5 Broom J, Broom A, Adams K, *et al.* What prevents the intravenous to oral antibiotic switch? A qualitative study of hospital doctors' accounts of what influences their clinical practice. *J Antimicrob Chemother* 2016;**71**:2295–9. doi:10.1093/jac/dkw129
- 6 James R, Luu S, Avent M, *et al.* A mixed methods study of the barriers and enablers in implementing antimicrobial stewardship programmes in Australian regional and rural hospitals. *J Antimicrob Chemother* 2015;**70**:2665–70. doi:10.1093/jac/dkv159
- 7 Bishop JL, Schulz TR, Kong DCM, *et al.* Qualitative study of the factors impacting antimicrobial stewardship programme delivery in regional and remote hospitals. *J Hosp Infect* 2019;**101**:440–6. doi:10.1016/j.jhin.2018.09.014
- 8 Bishop JL, Schulz TR, Kong DCM, *et al.* Similarities and differences in antimicrobial prescribing between major city hospitals and regional and remote hospitals in Australia. *Int J Antimicrob Agents* Published Online First: 2019.



- 1  
2  
3 doi:10.1016/j.ijantimicag.2018.10.009  
4  
5  
6 9 Bryant PA. Antimicrobial stewardship resources and activities for children in tertiary  
7 hospitals in Australasia: A comprehensive survey. *Med J Aust* 2015;**202**:134–9.  
8  
9 doi:10.5694/mja13.00143  
10  
11  
12 10 Osowicki J, Gwee A, Noronha J, *et al.* Australia-wide point prevalence survey of the  
13 use and appropriateness of antimicrobial prescribing for children in hospital. *Med J*  
14 *Aust* 2014;**201**:657–62. doi:10.5694/mja13.00154  
15  
16  
17  
18  
19 11 Bryant PA, Morgan N, Clifford V, *et al.* A whole of country analysis of antimicrobial  
20 stewardship resources, activities, and barriers for children in hospitals in Australia. In:  
21 *Open Forum Infect Diseases*. 2018. S108–9.  
22  
23 doi:https://dx.doi.org/10.1093/ofid/ofy210.268  
24  
25  
26  
27  
28 12 Gerber JS, Jackson MA, Tamma PD, *et al.* Policy Statement: Antibiotic stewardship in  
29 pediatrics. *J Pediatric Infect Dis Soc* 2021;**10**:641–9. doi:10.1093/jpids/piab002  
30  
31  
32  
33 13 Mackie TI, Schaefer AJ, Hyde JK, *et al.* The decision sampling framework: a  
34 methodological approach to investigate evidence use in policy and programmatic  
35 innovation. *Implement Sci* 2021;**16**:1–17. doi:10.1186/s13012-021-01084-5  
36  
37  
38  
39  
40 14 Yardley L, Morrison L, Bradbury K, *et al.* The person-based approach to intervention  
41 development: Application to digital health-related behavior change interventions. *J*  
42 *Med Internet Res* 2015;**17**:e30. doi:10.2196/jmir.4055  
43  
44  
45  
46  
47 15 [Blinded for review]  
48  
49  
50 16 Broom A, Broom J, Kirby E. Cultures of resistance? A Bourdieusian analysis of  
51 doctors' antibiotic prescribing. *Soc Sci Med* 2014;**110**:81–8.  
52  
53 doi:10.1016/j.socscimed.2014.03.030  
54  
55  
56 17 Broom A, Broom J, Kirby E, *et al.* What role do pharmacists play in mediating  
57 antibiotic use in hospitals? A qualitative study. *BMJ Open* 2015;**5**:e008326.  
58  
59  
60

- 1  
2  
3 doi:10.1136/bmjopen-2015-008326  
4  
5  
6 18 Lee SL, Azmi S, Wong PS. Clinicians' knowledge, beliefs and acceptance of  
7  
8 intravenous-to-oral antibiotic switching, hospital Pulau Pinang. *Med J Malaysia* 2012.  
9  
10  
11 19 Gulliford MC, Prevost AT, Charlton J, *et al.* Effectiveness and safety of electronically  
12  
13 delivered prescribing feedback and decision support on antibiotic use for respiratory  
14  
15 illness in primary care: REDUCE cluster randomised trial. *BMJ* 2019;**364**.  
16  
17 doi:10.1136/bmj.l236  
18  
19 20 Little P, Stuart B, Francis N, *et al.* Effects of internet-based training on antibiotic  
20  
21 prescribing rates for acute respiratory-tract infections: A multinational, cluster,  
22  
23 randomised, factorial, controlled trial. *Lancet* 2013;**382**:1175–82. doi:10.1016/S0140-  
24  
25 6736(13)60994-0  
26  
27  
28 21 Tamma PD, Cosgrove SE. Addressing the appropriateness of outpatient antibiotic  
29  
30 prescribing in the United States an important first step. *JAMA - J. Am. Med. Assoc.*  
31  
32 2016. doi:10.1001/jama.2016.4286  
33  
34  
35  
36  
37  
38  
39  
40  
41  
42  
43  
44  
45  
46  
47  
48  
49  
50  
51  
52  
53  
54  
55  
56  
57  
58  
59  
60

1  
2  
3  
4  
5  
6  
7  
8  
9  
10  
11  
12  
13  
14  
15  
16  
17  
18  
19  
20  
21  
22  
23  
24  
25  
26  
27  
28  
29  
30  
31  
32  
33  
34  
35  
36  
37  
38  
39  
40  
41  
42  
43  
44  
45  
46  
47  
48  
49  
50  
51  
52  
53  
54  
55  
56  
57  
58  
59  
60

Figure legend

*Figure 1.* Four phases of the development and evaluation of paediatric intravenous to oral switch materials

For peer review only

1  
2  
3  
4  
5  
6  
7  
8  
9  
10  
11  
12  
13  
14  
15  
16  
17  
18  
19  
20  
21  
22  
23  
24  
25  
26  
27  
28  
29  
30  
31  
32  
33  
34  
35  
36  
37  
38  
39  
40  
41  
42  
43  
44  
45  
46  
47  
48  
49  
50  
51  
52  
53  
54  
55  
56  
57  
58  
59  
60

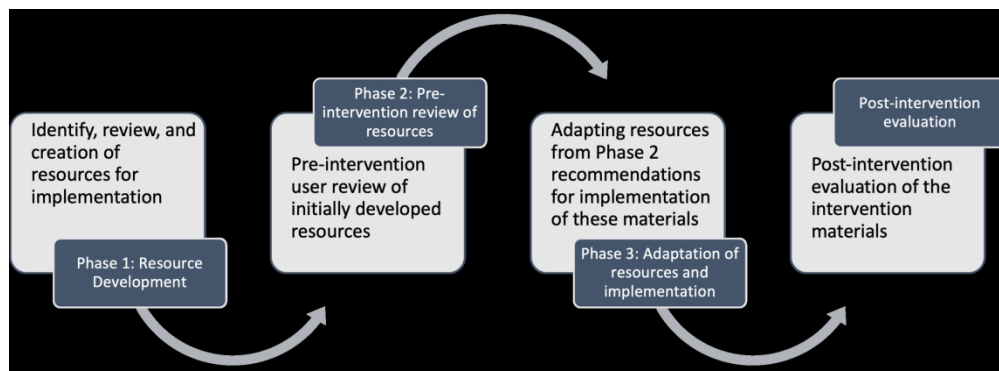

Four phases of the development and evaluation of pediatric intravenous to oral switch materials

226x83mm (300 x 300 DPI)

## COREQ (CONsolidated criteria for REporting Qualitative research) Checklist

A checklist of items that should be included in reports of qualitative research. You must report the page number in your manuscript where you consider each of the items listed in this checklist. If you have not included this information, either revise your manuscript accordingly before submitting or note N/A.

| Topic                                          | Item No. | Guide Questions/Description                                                                                                                              | Reported on Page No. |
|------------------------------------------------|----------|----------------------------------------------------------------------------------------------------------------------------------------------------------|----------------------|
| <b>Domain 1: Research team and reflexivity</b> |          |                                                                                                                                                          |                      |
| <i>Personal characteristics</i>                |          |                                                                                                                                                          |                      |
| Interviewer/facilitator                        | 1        | Which author/s conducted the interview or focus group?                                                                                                   |                      |
| Credentials                                    | 2        | What were the researcher's credentials? E.g. PhD, MD                                                                                                     |                      |
| Occupation                                     | 3        | What was their occupation at the time of the study?                                                                                                      |                      |
| Gender                                         | 4        | Was the researcher male or female?                                                                                                                       |                      |
| Experience and training                        | 5        | What experience or training did the researcher have?                                                                                                     |                      |
| <i>Relationship with participants</i>          |          |                                                                                                                                                          |                      |
| Relationship established                       | 6        | Was a relationship established prior to study commencement?                                                                                              |                      |
| Participant knowledge of the interviewer       | 7        | What did the participants know about the researcher? e.g. personal goals, reasons for doing the research                                                 |                      |
| Interviewer characteristics                    | 8        | What characteristics were reported about the interviewer/facilitator? e.g. Bias, assumptions, reasons and interests in the research topic                |                      |
| <b>Domain 2: Study design</b>                  |          |                                                                                                                                                          |                      |
| <i>Theoretical framework</i>                   |          |                                                                                                                                                          |                      |
| Methodological orientation and Theory          | 9        | What methodological orientation was stated to underpin the study? e.g. grounded theory, discourse analysis, ethnography, phenomenology, content analysis |                      |
| <i>Participant selection</i>                   |          |                                                                                                                                                          |                      |
| Sampling                                       | 10       | How were participants selected? e.g. purposive, convenience, consecutive, snowball                                                                       |                      |
| Method of approach                             | 11       | How were participants approached? e.g. face-to-face, telephone, mail, email                                                                              |                      |
| Sample size                                    | 12       | How many participants were in the study?                                                                                                                 |                      |
| Non-participation                              | 13       | How many people refused to participate or dropped out? Reasons?                                                                                          |                      |
| <i>Setting</i>                                 |          |                                                                                                                                                          |                      |
| Setting of data collection                     | 14       | Where was the data collected? e.g. home, clinic, workplace                                                                                               |                      |
| Presence of non-participants                   | 15       | Was anyone else present besides the participants and researchers?                                                                                        |                      |
| Description of sample                          | 16       | What are the important characteristics of the sample? e.g. demographic data, date                                                                        |                      |
| <i>Data collection</i>                         |          |                                                                                                                                                          |                      |
| Interview guide                                | 17       | Were questions, prompts, guides provided by the authors? Was it pilot tested?                                                                            |                      |
| Repeat interviews                              | 18       | Were repeat interviews carried out? If yes, how many?                                                                                                    |                      |
| Audio/visual recording                         | 19       | Did the research use audio or visual recording to collect the data?                                                                                      |                      |
| Field notes                                    | 20       | Were field notes made during and/or after the interview or focus group?                                                                                  |                      |
| Duration                                       | 21       | What was the duration of the interviews or focus group?                                                                                                  |                      |
| Data saturation                                | 22       | Was data saturation discussed?                                                                                                                           |                      |
| Transcripts returned                           | 23       | Were transcripts returned to participants for comment and/or                                                                                             |                      |

| Topic                                  | Item No. | Guide Questions/Description                                                                                                        | Reported on Page No. |
|----------------------------------------|----------|------------------------------------------------------------------------------------------------------------------------------------|----------------------|
|                                        |          | correction?                                                                                                                        |                      |
| <b>Domain 3: analysis and findings</b> |          |                                                                                                                                    |                      |
| <i>Data analysis</i>                   |          |                                                                                                                                    |                      |
| Number of data coders                  | 24       | How many data coders coded the data?                                                                                               |                      |
| Description of the coding tree         | 25       | Did authors provide a description of the coding tree?                                                                              |                      |
| Derivation of themes                   | 26       | Were themes identified in advance or derived from the data?                                                                        |                      |
| Software                               | 27       | What software, if applicable, was used to manage the data?                                                                         |                      |
| Participant checking                   | 28       | Did participants provide feedback on the findings?                                                                                 |                      |
| <i>Reporting</i>                       |          |                                                                                                                                    |                      |
| Quotations presented                   | 29       | Were participant quotations presented to illustrate the themes/findings?<br>Was each quotation identified? e.g. participant number |                      |
| Data and findings consistent           | 30       | Was there consistency between the data presented and the findings?                                                                 |                      |
| Clarity of major themes                | 31       | Were major themes clearly presented in the findings?                                                                               |                      |
| Clarity of minor themes                | 32       | Is there a description of diverse cases or discussion of minor themes?                                                             |                      |

Developed from: Tong A, Sainsbury P, Craig J. Consolidated criteria for reporting qualitative research (COREQ): a 32-item checklist for interviews and focus groups. *International Journal for Quality in Health Care*. 2007. Volume 19, Number 6: pp. 349 – 357

**Once you have completed this checklist, please save a copy and upload it as part of your submission. DO NOT include this checklist as part of the main manuscript document. It must be uploaded as a separate file.**

# BMJ Open

## Improving paediatric antimicrobial stewardship in remote and regional Queensland hospitals: development and qualitative evaluation of a tailored intervention for intravenous-to-oral antibiotic switching

|                                 |                                                                                                                                                                                                                                                                                                                                                                                                                                                                                                                                                                                                                                                                                    |
|---------------------------------|------------------------------------------------------------------------------------------------------------------------------------------------------------------------------------------------------------------------------------------------------------------------------------------------------------------------------------------------------------------------------------------------------------------------------------------------------------------------------------------------------------------------------------------------------------------------------------------------------------------------------------------------------------------------------------|
| Journal:                        | <i>BMJ Open</i>                                                                                                                                                                                                                                                                                                                                                                                                                                                                                                                                                                                                                                                                    |
| Manuscript ID                   | bmjopen-2022-064888.R1                                                                                                                                                                                                                                                                                                                                                                                                                                                                                                                                                                                                                                                             |
| Article Type:                   | Original research                                                                                                                                                                                                                                                                                                                                                                                                                                                                                                                                                                                                                                                                  |
| Date Submitted by the Author:   | 09-Nov-2022                                                                                                                                                                                                                                                                                                                                                                                                                                                                                                                                                                                                                                                                        |
| Complete List of Authors:       | Sharman, Leah; University of Queensland; University of Queensland Avent, Minyon L.; Queensland Health; University of Queensland Centre for Clinical Research (UQCCR)<br>Lyll, Vivian; The University of Queensland,<br>Fejzic, Jasmina; University of Queensland<br>Clark, Julia; Queensland Children's Hospital<br>Irwin, Adam; University Of Queensland Centre for Clinical Research; Great Ormond Street Hospital for Children, Department of Paediatric Infectious Diseases<br>Graham, Nicolette; Queensland Children's Hospital; Queensland Children's Hospital, Pharmacy Department<br>van Driel, Mieke L; University of Queensland, Academic Discipline of General Practice |
| <b>Primary Subject Heading</b>: | Paediatrics                                                                                                                                                                                                                                                                                                                                                                                                                                                                                                                                                                                                                                                                        |
| Secondary Subject Heading:      | Qualitative research                                                                                                                                                                                                                                                                                                                                                                                                                                                                                                                                                                                                                                                               |
| Keywords:                       | QUALITATIVE RESEARCH, Protocols & guidelines < HEALTH SERVICES ADMINISTRATION & MANAGEMENT, Infection control < INFECTIOUS DISEASES, PAEDIATRICS                                                                                                                                                                                                                                                                                                                                                                                                                                                                                                                                   |
|                                 |                                                                                                                                                                                                                                                                                                                                                                                                                                                                                                                                                                                                                                                                                    |

SCHOLARONE™  
Manuscripts



I, the Submitting Author has the right to grant and does grant on behalf of all authors of the Work (as defined in the below author licence), an exclusive licence and/or a non-exclusive licence for contributions from authors who are: i) UK Crown employees; ii) where BMJ has agreed a CC-BY licence shall apply, and/or iii) in accordance with the terms applicable for US Federal Government officers or employees acting as part of their official duties; on a worldwide, perpetual, irrevocable, royalty-free basis to BMJ Publishing Group Ltd ("BMJ") its licensees and where the relevant Journal is co-owned by BMJ to the co-owners of the Journal, to publish the Work in this journal and any other BMJ products and to exploit all rights, as set out in our [licence](#).

The Submitting Author accepts and understands that any supply made under these terms is made by BMJ to the Submitting Author unless you are acting as an employee on behalf of your employer or a postgraduate student of an affiliated institution which is paying any applicable article publishing charge ("APC") for Open Access articles. Where the Submitting Author wishes to make the Work available on an Open Access basis (and intends to pay the relevant APC), the terms of reuse of such Open Access shall be governed by a Creative Commons licence – details of these licences and which [Creative Commons](#) licence will apply to this Work are set out in our licence referred to above.

Other than as permitted in any relevant BMJ Author's Self Archiving Policies, I confirm this Work has not been accepted for publication elsewhere, is not being considered for publication elsewhere and does not duplicate material already published. I confirm all authors consent to publication of this Work and authorise the granting of this licence.



1  
2  
3  
4  
5  
6  
7 **Improving paediatric antimicrobial stewardship in remote and regional Queensland**  
8  
9 **hospitals: development and qualitative evaluation of a tailored intervention for**  
10  
11 **intravenous-to-oral antibiotic switching**  
12

13 Leah S. Sharman PhD<sup>1,2</sup>, Minyon L. Avent PhD<sup>3,4</sup>, Vivian Lyall PhD<sup>1</sup>, Jasmina Fejzic PhD<sup>5</sup>,  
14 Julia E. Clark PhD<sup>6,7</sup>, Adam D. Irwin PhD<sup>4,7</sup>, Nicolette Graham<sup>7,8</sup>, Mieke van Driel<sup>1</sup> MD PhD  
15  
16  
17  
18  
19

20  
21 <sup>1</sup> General Practice Clinical Unit, Faculty of Medicine, University of Queensland, Brisbane,  
22 Qld, Australia.  
23

24 <sup>2</sup> School of Psychology, Faculty of Health and Behavioural Sciences, University of  
25 Queensland, Brisbane, Qld, Australia.  
26

27 <sup>3</sup> Queensland Statewide Antimicrobial Stewardship Program, Queensland Health, Brisbane,  
28 Qld, Australia.  
29

30 <sup>4</sup> University of Queensland Centre for Clinical Research (UQCCR), Brisbane, Qld, Australia  
31

32 <sup>5</sup> School of Pharmacy, Faculty of Health and Behavioural Sciences, University of  
33 Queensland, Brisbane, Qld, Australia.  
34

35 <sup>6</sup> School of Clinical Medicine, Faculty of Medicine, University of Queensland, Brisbane, Qld,  
36 Australia.  
37

38 <sup>7</sup> Infection Management and Prevention Service, Medical Division, Queensland Children's  
39 Hospital, Brisbane, Qld, Australia.  
40

41 <sup>8</sup> Pharmacy Department, Queensland Children's Hospital, Brisbane, Qld, Australia.  
42  
43  
44  
45  
46  
47  
48  
49  
50

51 **Correspondence to:** Dr Leah Sharman, School of Psychology, McElwain Building,  
52 University of Queensland, St Lucia, QLD 4075, Australia  
53

54 E-mail: l.sharman1@uq.edu.au  
55  
56  
57

58 **Word count:** 3998  
59  
60

## ABSTRACT

**Objectives:** Timely intravenous (IV)-to-oral antibiotic switching for children is important for paediatric antimicrobial stewardship (AMS). However, low decision-making confidence and fragmentation of patient care can hamper implementation, with difficulties heightened regionally where AMS programs for children are lacking. The aim of this study was to develop and evaluate user-led creation and implementation of an intervention package for early IV-to-oral switching at regional hospitals in Queensland, Australia.

**Design:** Guided by theory, a four-phase approach was used to: (i) develop multifaceted intervention materials; (ii) review materials and their usage through stakeholders; (iii) adapt materials based on user-feedback; and (iv) qualitatively evaluate health workers experiences at 6-months post-intervention.

**Setting:** Seven regional hospitals in Queensland, Australia.

**Participants:** Phase 2 included 15 stakeholders; health workers and patient representatives (patient-guardians and Indigenous liaison officers). Phase 4 included 20 health workers across the seven intervention sites.

**Results:** Content analysis of health worker and parent/guardian reviews identified the 'perceived utility of materials' and 'possible barriers to use'. 'Recommendations and strategies for improvement' provided adjustments for the materials that were able to be tailored to individual practice. Post-intervention interviews generated three overarching themes that combined facilitators and barriers to switching: (1) application of materials, (2) education and support, and (3) team dynamics. Overall, despite difficulties with turnover and problems with the medical hierarchy, interventions aided and empowered antibiotic therapy decision-making and enhanced education and self-reflection.

**Conclusions:** Despite structural barriers to AMS for switching from IV-to-oral antibiotics in paediatric patients, offering a tailored multifaceted intervention was reported to provide support and confidence to adjust practice across a diverse set of health workers in regional areas. Future AMS activities should be guided by users and provide opportunities for tailoring tools to practice setting and patients' requirements.

**Keywords:** antimicrobial resistance, antibiotic therapy, medical decision making, qualitative research, hospital medicine, paediatrics, regional, antimicrobial stewardship

## ARTICLE SUMMARY

### Strengths and limitations of this study

- Provides a theory-based approach to the development and evaluation of a user-led paediatric antimicrobial stewardship intervention.
- Examines the perspectives of health workers and parents/guardians in the creation of materials to improve early paediatric intravenous-to-oral antibiotic switching and their uptake.
- Provides perspectives for barriers and some solutions to improving comprehension of healthcare materials for Indigenous parents/guardians.
- Post-intervention qualitative interviews did not include parents/guardians or Indigenous health liaisons to understand the parent/guardian information leaflets uptake in practice.
- Although sampling regional, rural, and remote hospitals in Queensland, it could in future be expanded to incorporate a larger number of these sites to identify the variance between these hospital environments and professional perspectives.

## INTRODUCTION

Increasing antimicrobial resistance worldwide has prompted international development of antimicrobial stewardship (AMS) programs, with the goal of optimizing antibiotic use to limit resistance development. While one strategy for enhancing appropriate antibiotic use is the promotion of early intravenous (IV) to oral antibiotics transition, or “IV to oral switch” [1,2], these have yet to be uniformly adopted into national guidelines in many countries [3].

In 2011, Australia introduced AMS as a dedicated hospital accreditation standard and an incentive for AMS programs [4]. However, barriers to AMS program implementation include a lack of decision-making confidence, fragmentation of patient care across health practitioners, and access to AMS expertise [5]. These issues are frequently present in regional areas [6,7], with geographical isolation, small staff numbers, and less access to AMS expertise and support than urban areas [8].

Although Australia has seen a push for greater AMS programs nationally, there are some limitations within the measures commonly used or recommended in adult settings, which may not be translatable to paediatrics. This disparity has resulted in significant evidence gaps in infection burden surveillance, susceptibility patterns [9,10], and implementation of AMS activities [9,11]. Indeed, in their policy statement on AMS, the American Academy of Paediatrics Committee on Infectious Diseases and the Paediatric Infectious Diseases Society [12] include implementing a program specifically for the conversion of IV-to-oral antibiotic therapy in children. In a recent publication we utilised a package of intervention materials for IV-to-oral switching in paediatric patients [13]. This intervention allowed healthcare workers to tailor materials to their practice setting and patients’ requirements, demonstrating that a tailored program increased the percentage of patients whose IV therapy was appropriately stopped or switched to oral therapy as well as decreased the duration of IV antibiotics requirements. This study provides a structured

1  
2  
3 analysis of the development and evaluation of these materials as a timely IV-to-oral AMS  
4  
5 strategy using consultation with health workers and parent/guardians and aiming to optimize  
6  
7 uptake and reduce barriers to use in remote and regional Queensland hospitals.  
8  
9

## 10 **METHODS**

11  
12 A combination of two conceptual theoretical frameworks (decision sampling framework [14]  
13  
14 and person-based approach [15]), were used to develop and evaluate a multifaceted package  
15  
16 of tailored interventions. Evaluation included stakeholders at seven Queensland regional and  
17  
18 rural hospital sites comprising patient-guardians and diverse health practitioners, such as  
19  
20 nurses, doctors, pharmacists, and Indigenous liaison officers. Here, we present the stepped  
21  
22 phases of development, implementation, and evaluation of a paediatric IV-to-oral switch  
23  
24 program. The final resources used for the intervention can be found in the supplementary  
25  
26 materials of Avent et al., 2021 [13].  
27  
28  
29  
30

## 31 **Ethics**

32  
33 Ethical approval for this research was granted by Children's Health Queensland Human  
34  
35 Research Ethics Committee for all sites in this research (LNR/18/QRCJ/44322). All  
36  
37 participants provided verbal and/or written consent before interviews and were able to  
38  
39 remove consent at any point during the interview.  
40  
41  
42  
43

## 44 **Framework**

45  
46 The decision sampling framework presents optimal 'evidence-informed decisions' for  
47  
48 intervention creation by using (i) the best available evidence, (ii) experts to evaluate and  
49  
50 review the usefulness, practicality, and the contexts and intervention will be used in, and (iii)  
51  
52 the consideration of values of intervention users and their patients to increase the use and  
53  
54 impact of an intervention. The person-based approach, similarly, focuses on the development  
55  
56 of interventions as concentrating on and accommodating perspectives of those who will use  
57  
58 the intervention, ensuring ease of use and relevance. In designing an intervention, this  
59  
60

1  
2  
3 framework encourages the use of consultation with experts and stakeholders as part of  
4  
5 intervention development at multiple stages of the process to identify key challenges and  
6  
7 evaluate components of the intervention from a user perspective.  
8  
9

10 Drawing on these frameworks, the research involved four phases (Figure 1): (1)  
11 Resource development: identifying, reviewing, and creating resources for implementation;  
12  
13 (2) a pre-intervention review of these resources; (3) adapting resources based on user  
14  
15 recommendations and implementation of the materials; and (4) a post-intervention evaluation  
16  
17 of the intervention materials. See Additional File 1 for a COREQ checklist of the qualitative  
18  
19 phases.  
20  
21  
22  
23  
24

### 25 ***Phase 1: Resource development***

26  
27 An intervention package for paediatric AMS “switching” from IV-to-oral antibiotic therapy  
28  
29 was resourced by the research team from relevant literature through PubMed searches  
30  
31 (limited to English-language publications) and author libraries from 2014 to 2018. AMS  
32  
33 intervention materials were guidelines for community acquired pneumonia and skin and soft  
34  
35 tissue infections, decision flow charts, medication tables, chart stickers, fact sheets, lanyards,  
36  
37 and a patient-guardian information leaflet that promoted timely IV-to-oral conversion of  
38  
39 antibiotic therapy (See Supplementary Material 1).  
40  
41  
42  
43

### 44 ***Phase 2: Pre-intervention review of resources***

45  
46 A qualitative pre-intervention evaluation of these intervention resources by 15  
47  
48 multidisciplinary healthcare workers, eight parents/guardians, and five Aboriginal and Torres  
49  
50 Strait Islander health workers (including Indigenous Liaison Officers) from a regional and  
51  
52 rural hospital site was conducted. Parents/guardians and Indigenous Liaison Officers were  
53  
54 purposively sampled through invitation by local hospital coordinators. Healthcare workers  
55  
56 were recruited through snowball sampling. Individual semi-structured interviews were  
57  
58 conducted by an independent female qualitative research officer (VL) from the University.  
59  
60

1  
2  
3 However, where the researcher was not able to conduct the interview by phone, they were  
4  
5 conducted on-site by one of two local paediatric registrars (a man and a woman) trained in  
6  
7 interview techniques at two study sites. All participants were provided with an information  
8  
9 sheet that included the aims of the research and asked for their consent to take part in audio  
10  
11 recorded interviews. Participants were provided with a copy of the questions before the  
12  
13 interviews (see Supplementary Material 2), which asked them to review the content and  
14  
15 design of the intervention materials and consider their relevance and utility for them  
16  
17 personally, their practice, and/or that of their colleagues, or other parent/guardians  
18  
19 perspective. All interviews were digitally audio-recorded, transcribed verbatim, and de-  
20  
21 identified. The duration of interviews was not recorded.  
22  
23  
24  
25

26  
27 Analysis was conducted by two independent coders (VL, LS) with respective  
28  
29 backgrounds in Medicine and Psychology. Analysis used directed qualitative content  
30  
31 analysis, which was focused on the decision sampling framework to identify gaps in  
32  
33 information, practical implementation of the materials, and suggestions for improvement.  
34  
35

### 36 ***Phase 3: Adaption of resources and implementation***

37  
38 Resources from phase 1 were adapted based on responses from the phase 2 semi-structured  
39  
40 interviews. Implementation for each site utilized the reviewed and adapted package of  
41  
42 intervention resources and were applied using a persuasive approach. This suite of  
43  
44 interventions provided healthcare workers with the opportunity to tailor the use of these tools  
45  
46 according to their practice setting and patient's requirements (Table 1). A more detailed  
47  
48 discussion about this aspect of the study can be found in in Supplementary Material 3.  
49  
50  
51  
52  
53  
54

55 **Table 1. Intervention materials and their placement on wards**

| Material      | Description                                                         | Type                      | Common Placements                 |
|---------------|---------------------------------------------------------------------|---------------------------|-----------------------------------|
| ?STOP Poster* | A simple IV to oral guide to aid in practitioner's decision-making. | A3 Posters<br>A4 laminate | On walls and in medication charts |

| Material                                          | Description                                                                                                                           | Type                      | Common Placements                 |
|---------------------------------------------------|---------------------------------------------------------------------------------------------------------------------------------------|---------------------------|-----------------------------------|
| Flowchart*                                        | Detailed chart for identifying those eligible for IV to oral antibiotic conversion.                                                   | A3 Posters<br>A4 laminate | On walls and in medication charts |
| Stickers on Paediatric Inpatient Medication chart | Reminders to prompt a medication review.                                                                                              | Labels/<br>Stickers       | Medication charts                 |
| Guidelines                                        | For CAP and SSTIs including first line antibiotics and dosages, and another included comparable IV to oral antibiotics for switching. | A4 laminate               | In medication charts              |
| Fact Sheet                                        | A general IV to oral conversion fact sheet for healthcare workers.                                                                    | A4 handouts               | Given to health workers           |
| Education presentation                            | One-hour presentation regarding AMS and the intervention.                                                                             | Presentation              | In-person and online              |
| Patient-guardian information leaflet              | Information for patient-guardians regarding switching from IV to oral antibiotic medication.                                          | Pamphlet                  | On ward or in the pharmacy        |
| Patient-guardian video                            | A 10-minute video presented by an Indigenous doctor regarding switching from IV to oral antibiotic medication for patient-guardians.  | Video                     | Online                            |

*Note:* \* = site choice of wall placement; IV = intravenous, CAP = community acquired pneumonia, SSTI = skin and soft tissue infection, AMS = antimicrobial stewardship

#### **Phase 4: Post-intervention evaluation**

To explore whether and how the intervention materials were utilized as an AMS strategy in paediatric patients, we again conducted semi-structured interviews with 20 health practitioners from the seven study sites. Unfortunately, these interviews were not able to include parents/guardians because access to this population was not feasible at the end of the 6-month intervention and after the completed treatment period for patients. Further we were not able to know who received the material to contact them for this phase of the research. Participants were recruited through emails to hospital staff and via snowball sampling, with the aim to include a range of health practitioners who had the opportunity to use the materials. A minimum sample size of 15 participants was specified and recruitment stopped when interviews appeared to have reached data saturation (information redundancy), identified by a lack of variation in the richness of answers across participants [16]. Interviews generally followed the same procedures as phase 2, with a female qualitative research officer



1  
2  
3 (LS) from the University conducting interviews over the phone and the same two registrars  
4  
5 conducting in-person interviews at local sites where phone interviews were not possible. The  
6  
7 20 interviews analysed ranged between 5m and 32m in duration ( $M = 17.29m$ ). Participants  
8  
9 were asked to reflect on their use of the materials and provide perceptions of the quality of  
10  
11 the content (comprehension and relevance), effectiveness of the design of the materials,  
12  
13 perceptions of usefulness in daily practice, and how supported they felt to effectively use the  
14  
15 materials.  
16  
17

18  
19 Thematic analysis for this phase was conducted by two independent coders (LS, JF)  
20  
21 with different health backgrounds (Psychology and Pharmacy). Analysis used an essentialist  
22  
23 approach, reflecting the reality and experiences of participants, that was reflexive and  
24  
25 iterative to identify themes within the data [17–19]. Themes were generated from codes  
26  
27 based on underlying constructs with a focus on implementation of the materials to daily  
28  
29 practice, support to use the materials, and the effectiveness of the materials. Consensus on  
30  
31 themes was achieved after discussion and refinement by coders.  
32  
33  
34

### 35 36 **Patient and public involvement**

37  
38 Physicians (paediatricians, registrars and consultants) pharmacists, nurses and patient  
39  
40 representatives (patient-guardians and Indigenous liaison officers) were involved in the  
41  
42 design and implementation of the overall project. Their level of involvement is described in  
43  
44 each phase of the research. Results of the research will be disseminated to study participants  
45  
46 if they indicated interest in receiving an abstract of the findings. They will be further  
47  
48 disseminated through hospital newsletters and practice-oriented publications.  
49  
50  
51

## 52 53 **RESULTS**

### 54 55 **Phase 2: pre-intervention review**

56  
57 Demographics for phases 2 and 4 are shown in Table 2. Results for phase 2 identified gaps in  
58  
59 information and practical implementation of the intervention materials interviews and are  
60

presented in Table 3. Supplementary Material 3 provides further decision-making and quotes related to this phase.

The materials were viewed as having some perceived utility, particularly to healthcare workers (Table 3). For healthcare workers the materials were seen as: accessible and direct information resources, able to assist with decision making confidence, helpful learning tools or prompts, and able to support communication between multidisciplinary teams. Carers who evaluated the patient-guardian information leaflet felt it could empower them to ask

**Table 2. Pre and post intervention participant demographics**

|                                    | Pre-intervention<br>(phase 2) |                | Post-intervention (phase 4) |                |                              |                                            |                                              |
|------------------------------------|-------------------------------|----------------|-----------------------------|----------------|------------------------------|--------------------------------------------|----------------------------------------------|
|                                    | <i>N</i>                      | <i>% Women</i> | <i>N</i>                    | <i>% Women</i> | <i>Mean time<br/>in role</i> | <i>Primary<br/>material<br/>preference</i> | <i>Secondary<br/>material<br/>preference</i> |
| Registered Nurse                   | 4                             | 75%            | 5                           | 100%           | 5.7 years                    | ?STOP guide                                | Patient-guardian leaflet/ Education          |
| Pharmacist                         | 3                             | 67%            | 6                           | 100%           | 8.5 years                    | ?STOP guide / Detailed flow chart          | Patient chart stickers                       |
| Paediatric Director/Consultant     | 4                             | 25%            | 1                           | 100%           | 3 years                      | ?STOP guide                                | Detailed flow chart                          |
| Paediatric Registrar               | 1                             | 100%           | 4                           | 75%            | 1.3 years                    | ?STOP guide                                | Patient-guardian leaflet                     |
| Junior Resident                    | 3                             | 67%            | 3                           | 67%            | 1.3 years                    | ?STOP guide                                | None                                         |
| Indigenous health worker / liaison | 5                             | 60%            | 1                           | 0%             | 1 years                      | ?STOP guide                                | Patient-guardian leaflet                     |
| Parent/guardian                    | 8                             | 88%            | 0                           | -              | -                            | N/A                                        |                                              |

questions about treatment and felt more widely informed about doctors' decision making. On the other hand, Indigenous health workers felt that there were multiple barriers to use the patient-guardian leaflet for these regional and rural areas. It was noted that low literacy and health literacy would mean few in their community would be able to understand the information leaflet. Among other things, the cultural diversity of Aboriginal and Torres Strait Islander peoples, distrust of Western healthcare, differences in the way knowledge is passed

1  
2  
3 on (e.g., visually), and the different dynamics of living spaces among these peoples  
4  
5 highlighted that there was no 'one size fits all' approach.  
6  
7

### 8 **Phase 3: Adaptation**

9

10 New resources were developed based on the feedback from phase 2. These included a patient  
11 video to address where English was not a first language for parents/caregivers and for  
12  
13 Aboriginal and Torres Strait Islander patients where liaison officers advocated for more  
14  
15 opportunities for visual learning. This video was led and produced an AMS pharmacist in  
16  
17 collaboration with a regional Indigenous medical doctor to meet the needs of the Aboriginal  
18  
19 and Torres Strait Islander communities. An online education video was also developed by a  
20  
21  
22  
23  
24  
25  
26  
27  
28  
29  
30  
31  
32  
33  
34  
35  
36  
37  
38  
39  
40  
41  
42  
43  
44  
45  
46  
47  
48  
49  
50  
51  
52  
53  
54  
55  
56  
57  
58  
59  
60

**Table 3. Facilitators, barriers, and recommendations for change to encourage IV to oral switch intervention utilization**

| Material                                                        | Perceived Utility of Materials                                                                                                                                                                                                                                                                                                                                                                                                                               | Possible Barriers to Use                                                                                                                                                                                                                                                                                                                                                                                                                                                                                              | Recommendations and Strategies                                                                                                                                                                                                                                                                                                                                                                                                                                                                                                                            |
|-----------------------------------------------------------------|--------------------------------------------------------------------------------------------------------------------------------------------------------------------------------------------------------------------------------------------------------------------------------------------------------------------------------------------------------------------------------------------------------------------------------------------------------------|-----------------------------------------------------------------------------------------------------------------------------------------------------------------------------------------------------------------------------------------------------------------------------------------------------------------------------------------------------------------------------------------------------------------------------------------------------------------------------------------------------------------------|-----------------------------------------------------------------------------------------------------------------------------------------------------------------------------------------------------------------------------------------------------------------------------------------------------------------------------------------------------------------------------------------------------------------------------------------------------------------------------------------------------------------------------------------------------------|
| Eligibility Flowchart And Suitable Agents                       | <ul style="list-style-type: none"> <li>- Assisting Junior doctors with decision making</li> <li>- A direct guideline and resource that will impact practice</li> <li>- Affirm confidence in decision-making</li> <li>- Formalized the approach to switching</li> <li>- Accessible and easy to follow</li> </ul>                                                                                                                                              | <ul style="list-style-type: none"> <li>- May have too many options that could be minimized</li> <li>- Exclusion criteria may be too limited</li> <li>- Suitable agent chart did not adequately address important barriers to oral antibiotics, such as tablet vs liquid dosage and taste</li> </ul>                                                                                                                                                                                                                   | <ul style="list-style-type: none"> <li>- The colours could be more obvious to simplify use of the flowchart</li> <li>- Increase readability of the by asking simpler questions</li> <li>- Attached to pharmacist files and doctor's charts.</li> </ul>                                                                                                                                                                                                                                                                                                    |
| ?Stop Guideline                                                 | <ul style="list-style-type: none"> <li>- Useful as a quick review guide</li> <li>- Visibility of a guideline would reduce anxiety for guardians wanting to continue IV antibiotics</li> <li>- Nurses felt they could use it to prompt doctors and to gain knowledge about administered treatments</li> <li>- Increases decision-making confidence among Junior doctors</li> <li>- Bright colours and acronym were easy to read and easy to follow</li> </ul> | <ul style="list-style-type: none"> <li>- Potentially limited decision making for further evaluations, like which oral doses to switch to and the timing of those doses</li> <li>- Some information suggesting external consultation of infectious diseases could delay important decision making</li> <li>- Doesn't address barriers to switching, such as children's reluctance to take oral medications</li> </ul>                                                                                                  | <ul style="list-style-type: none"> <li>- Could consult a more senior medical officer, rather than infectious diseases</li> <li>- Some improvements to the colours, such as using neutral colours not associated with emergency</li> <li>- Copies of the guideline in the medication section of a patients' chart</li> <li>- Target nurses where they would see them most, i.e. near medications</li> </ul>                                                                                                                                                |
| Lanyard With Guideline                                          | <ul style="list-style-type: none"> <li>- Interns felt they would refer to the lanyard frequently if it had the ?STOP Guideline</li> <li>- Useful for easy access when a physical poster is unavailable</li> </ul>                                                                                                                                                                                                                                            | <ul style="list-style-type: none"> <li>- Some felt they had too many lanyards and it wouldn't be used</li> </ul>                                                                                                                                                                                                                                                                                                                                                                                                      | <ul style="list-style-type: none"> <li>- Distribute lanyards to all paediatric staff</li> </ul>                                                                                                                                                                                                                                                                                                                                                                                                                                                           |
| Patient Chart Stickers                                          | <ul style="list-style-type: none"> <li>- Important prompt to encourage timely reviews of clinical decisions</li> <li>- Support communication between team members</li> <li>- Encourages multi-disciplinary decision-making</li> </ul>                                                                                                                                                                                                                        | <ul style="list-style-type: none"> <li>- Not able to be used on an integrated electronic medical record</li> </ul>                                                                                                                                                                                                                                                                                                                                                                                                    | <ul style="list-style-type: none"> <li>- Consider adjusting the black text on red sticker to a yellow sticker for readability and attention</li> <li>- Add to patient medical charts</li> </ul>                                                                                                                                                                                                                                                                                                                                                           |
| Fact Sheet                                                      | <ul style="list-style-type: none"> <li>- Helpful as a learning tool for new staff, students, and junior doctors</li> <li>- Helping staff understand best practice</li> </ul>                                                                                                                                                                                                                                                                                 |                                                                                                                                                                                                                                                                                                                                                                                                                                                                                                                       | <ul style="list-style-type: none"> <li>- Should be available electronically with reference links to support further reading</li> <li>- Place strategically in ward to encourage staff and student education</li> </ul>                                                                                                                                                                                                                                                                                                                                    |
| Patient-Guardian Information Leaflet                            | <ul style="list-style-type: none"> <li>- Something tangible for parents to take home and read through, rather than be overloaded with information</li> <li>- Carers felt they were well informed and provided peace of mind about doctors decisions</li> <li>- Carers felt empowered and that they were enabled to ask questions about treatment</li> </ul>                                                                                                  | <ul style="list-style-type: none"> <li>- Low literacy and healthcare illiteracy for some carers may make comprehension difficult</li> <li>- Carers felt the information was important and the terminology was easy to understand</li> <li>- Lack of information about the side-effects of IV and oral antibiotics</li> <li>- Information would be best received once their child was settled in the paediatric ward</li> </ul>                                                                                        | <ul style="list-style-type: none"> <li>- Provide a quick summary of the sheet's main message at the front</li> <li>- Use more simplistic language and reduce the information to one page</li> <li>- More clarity and detail around the side-effects of medication types</li> <li>- Some wanted to read it themselves, others wanted someone to talk them through it</li> </ul>                                                                                                                                                                            |
| Indigenous Perspectives Of Patient-Guardian Information Leaflet | <ul style="list-style-type: none"> <li>- This sheet would be ok for people with good literacy</li> </ul>                                                                                                                                                                                                                                                                                                                                                     | <ul style="list-style-type: none"> <li>- Impact of low literacy, numeracy, and health literacy in understanding the content</li> <li>- "Aboriginal people are a lot more visual"</li> <li>- Diversity of Aboriginal and Torres Strait Islander Peoples and there not being a 'one size fits all'</li> <li>- Distrust in Western medicine could make them reluctant to give any antibiotics</li> <li>- Dynamics of housing and crowded living spaces could impact how medications are taken out of hospital</li> </ul> | <ul style="list-style-type: none"> <li>- Using culturally appropriate language, images, and colours</li> <li>- Include 'what, why, how' of antibiotic use and side effects of IV vs oral</li> <li>- Acknowledge traditional medicines and their potential role</li> <li>- Increase visual representations of the content and provide clear verbal explanations "You need to explain things to our mob... [they] won't walk around with paper"</li> <li>- Using Indigenous people invested in Indigenous health to design and develop materials</li> </ul> |

1  
2  
3 paediatric infectious disease specialist and AMS pharmacist to upskill clinicians in the  
4 management of acquired pneumonia and skin and soft tissue infections as well as provide  
5 guidance for timely IV to oral conversion.  
6  
7  
8  
9

#### 10 **Phase 4: Post-intervention**

11  
12 Overall, three major themes were found in the data. See Table 4 for example quotes by  
13 themes.  
14  
15  
16

#### 17 *Application of materials*

18  
19  
20 *Utility of decision-aids.* Across participants, there were generally positive views about  
21 the impact of the materials, particularly the design of the materials and how they supported  
22 decision making.  
23  
24  
25

26  
27 *Memorable and simple.* Each of the materials varied in their frequency and popularity  
28 of use, but the use of materials that were eye-catching, memorable, and simple to use were  
29 the most often utilized. This was primarily true for the ?STOP chart and the yellow chart  
30 stickers for antibiotic review. The ?STOP chart in particular was the most favoured material  
31 across all health disciplines and the yellow sticker was utilised most often by pharmacists.  
32  
33 These materials were utilised differently by each type of health-practitioner, with doctors  
34 using them as switching guides, nurses using them to prompt doctors and for education, and  
35 junior doctors using them as evidence for decisions to switch in presentations to seniors. This  
36 is reflected further in the themes below and preferences for materials can be seen in Table 1.  
37  
38  
39  
40  
41  
42  
43  
44  
45  
46  
47  
48

49 *Targeted locations.* Strategic placement of the materials was an important factor for  
50 all participants to easily access, engage with, and remember materials for decision-making.  
51  
52 Thus, location and convenience of materials was paramount to success of the intervention.  
53  
54 Participants reported remembering and utilizing charts and posters placed in hand-over  
55 rooms, clinical rooms, treatment rooms, nurses' stations, within patient charts, next to  
56  
57  
58  
59  
60

1  
2  
3 computers, or as online bookmarks. In these high-traffic and relevant areas, they posed as a  
4 reminder about the importance of antibiotic switching and could also aid in decision-making.  
5  
6

7  
8 *Understanding patients' needs.* Factors of patients and their caregivers also  
9 influenced decisions to use (or not use) the materials. For example, patient-guardian leaflets  
10 were offered intermittently, with some health practitioners finding them useful adjuncts to  
11 delivering face-to-face advice with patient-guardians regarding why they were switching  
12 from IV to oral antibiotics. Alternately, others only offered leaflets with complex patients as  
13 they felt patient-guardians would be most receptive to the information. Similarly, some  
14 paediatric teams felt they did not need the switching materials because their patients were not  
15 complex enough or where they had already switched antibiotics to oral within 24-48 hours.  
16  
17  
18  
19  
20  
21  
22  
23  
24  
25

### 26 27 ***Education and support***

28  
29 *Updating and reinforcing knowledge.* Participants described the materials as  
30 supporting education and training among staff members unfamiliar with AMS, as well as  
31 their use as reminders of what antibiotics are appropriate and how to effectively switch from  
32 IV to oral. Further, doctors and pharmacists felt the presence of the materials helped to  
33 facilitate more discussion around AMS and to solidify prior knowledge regarding appropriate  
34 antibiotic treatment.  
35  
36  
37  
38  
39  
40  
41  
42  
43

44 *Familiarity.* Familiarity with the content of the switching guides was expressed as  
45 necessary to enable effective use of those guides. Having departmental and executive support  
46 to understand the information in the materials was described as central to this process.  
47  
48 However, knowledge about the types of materials available or their whereabouts on the ward  
49 were not always available to staff. In particular, difficulties arose regarding the video created  
50 for Aboriginal and Torres Strait Islander Peoples, which was also available as an audio-visual  
51 option for other patient-guardians. Participants reported not utilizing this video, primarily  
52 because they were not aware of it. However, those who were aware, primarily nurses, either  
53  
54  
55  
56  
57  
58  
59  
60

1  
2  
3 did not know how to access it, or due to technological constraints, could not provide the  
4  
5 video as a resource to patient-guardians.  
6  
7

8 *Reminders.* Reminders were often suggested as the best way to prompt continued use  
9  
10 of the materials, in the form of education and simple emails. It was also suggested that the  
11  
12 strategy of in-person education used within this study was a persuasive prompt for AMS and  
13  
14 use of materials to aid switching decision-making.  
15  
16

### 17 ***Team dynamics***

18  
19  
20 *Empowering staff and changing practice.* Both junior and senior staff felt the  
21  
22 materials were empowering and helpful for junior medical and nursing practitioners in  
23  
24 presenting a decision to a senior staff member. Ultimately, several participants commented  
25  
26 that the use of the materials had influenced their own or their team members' practice in  
27  
28 thinking and acting more proactively about switching from IV to oral antibiotics within  
29  
30 paediatric care.  
31  
32

33  
34  
35 *Broad engagement.* Some participants felt the broad engagement of different health  
36  
37 practitioners helped to ensure good AMS practice across patient care.  
38

39  
40  
41 *Prior experience.* However, difficulties were also noted in engaging material uptake  
42  
43 particularly among senior doctors/consultants. Participants echoed that for those senior  
44  
45 healthcare workers, they were less likely to utilize the available guidelines and instead base  
46  
47 their decisions on prior knowledge and experience.  
48

49  
50  
51 *Transience.* Lack of support and engagement from some sites, particularly in rural  
52  
53 and remote areas created difficulties in appropriate use of the materials. Notably, all health  
54  
55 practitioner groups reported that not having pharmacists on the ward or a lack of engagement  
56  
57 from pharmacy was a constraint on effectively employing the intervention. This limitation  
58  
59 was not always due to a pharmacist's lack of awareness of the intervention, but rather due to  
60



**Table 4. Post-intervention themes and example quotes**

| Theme                    | Sub-theme                              | Example quote                                                                                                                                                                                                                                                                                                                                                                                                                                                                                                                                                                                                                                                                                                                                                                                                                                                                                                                                            |
|--------------------------|----------------------------------------|----------------------------------------------------------------------------------------------------------------------------------------------------------------------------------------------------------------------------------------------------------------------------------------------------------------------------------------------------------------------------------------------------------------------------------------------------------------------------------------------------------------------------------------------------------------------------------------------------------------------------------------------------------------------------------------------------------------------------------------------------------------------------------------------------------------------------------------------------------------------------------------------------------------------------------------------------------|
| Application of materials | Utility of decision-aids               | <i>"Yeah especially in regards to suitability whereby you know the patient has got a specific disease like a cellulitis that they cannot or have not in the past ... Yeah it's good because it gives you a clear guide for using another agent."</i> (Pharmacist, regional)                                                                                                                                                                                                                                                                                                                                                                                                                                                                                                                                                                                                                                                                              |
|                          | Memorable and simple                   | <i>"Yes I'd say the yellow sticker was the best because it was bright and it's hard to miss on the chart so it was kind of just a prompt for them when they were reviewing the chart."</i> (Pharmacist, rural)<br><br><i>"I think just because it was straightforward and just easy, I think the clinicians they refuse to cut guidelines. I think the flow chart just made a lot more sense, it's easy."</i> (Registrar, rural)                                                                                                                                                                                                                                                                                                                                                                                                                                                                                                                         |
|                          | Targeted locations                     | <i>"They were definitely strategically placed to not be overwhelmed but be in places where you are thinking about prescribing antibiotics."</i> (RN, remote)                                                                                                                                                                                                                                                                                                                                                                                                                                                                                                                                                                                                                                                                                                                                                                                             |
|                          | Understanding patients' needs          | <i>"...it was a way for me to just, you know, add-on to the counselling... Rather than just saying, 'Take 5 mill's four times a day' ... it gave a couple of other talking points to go through the leaflet. Just to make sure they knew how long it had to go on for, what to do if they needed to go back to see the doctor again and that sort of thing."</i> (Senior Pharmacist, rural)<br><br><i>"...when we give patients information or their parents info I think if it's like a long-term chronic condition they are likely to read it and are more receptive."</i> (Registrar, remote)<br><br><i>"I feel that in the clinical situations in this hospital we haven't been requiring the flow chart much over the last few months. And that's on the basis that our consultants are already doing quite well in terms of switching antibiotics or ceasing antibiotics already before the flow chart was given to us."</i> (Registrar, regional) |
|                          | Updating and reinforcing knowledge     | <i>"...we did that to help flag and get the discussions around antimicrobials and paediatrics happening all around this time. So for us it was good to do that and raise a bit more awareness on the type of medications they were prescribing and you know whether it was matching guidelines..."</i> (Senior pharmacist, rural)<br><br><i>"... it did allow more open conversations with other people because there was a resource there. So in terms of helping me explicitly make the same decisions probably not a lot of help. But in terms of facilitating discussions with other people about the same decision making, very helpful."</i> (Registrar, rural)                                                                                                                                                                                                                                                                                    |
| Education and support    | Familiarity                            | <i>"You need to be familiar with it so I have familiarized most of the nursing staff with it at changeover or when they're on shift. But if you are familiar with it it's great especially considering that some of the nurses are having more contact time than say the medical staff will so it's giving them a bit more confidence."</i> (Senior Pharmacist, regional)<br><br><i>"I didn't know there was a video available so I would not expect that the rest of my staff knew..."</i> (NUM, rural)                                                                                                                                                                                                                                                                                                                                                                                                                                                 |
|                          | Reminders                              | <i>"[an AMS practitioner] came and spoke with us ... and she came back a second time as well so she came and did some education with the doctors and then came and did some education with the nurses. I think that's helpful."</i> (NUM, rural)                                                                                                                                                                                                                                                                                                                                                                                                                                                                                                                                                                                                                                                                                                         |
|                          | Empowering staff and changing practice | <i>"[It] gives me sort of some confidence to ask about changing to oral."</i> (RMO, rural)<br><br><i>"Yes, definitely and I noticed a few times they would fax through an antibiotic request to pharmacy that would have the sticker on it and then [for] the dispensing pharmacist that would be a prompt to them to say 'oh okay maybe I need to call about this to supply more' before I supply it."</i> (AMS Pharmacist, rural)                                                                                                                                                                                                                                                                                                                                                                                                                                                                                                                      |
| Team Dynamics            | Multi-disciplinary engagement          | <i>"... it was good that it was so inclusive, quite often we've done things where it's only just been nurses ... it's been their full responsibility. But having that whole procedure so if we didn't pick it up the doctors hopefully did, or the pharmacists will come through and do it."</i> (RN, rural)                                                                                                                                                                                                                                                                                                                                                                                                                                                                                                                                                                                                                                             |
|                          | Knowledge and experience               | <i>"So even if you're pointing out guidelines or you're pointing out resources ... it may be that the person who makes all the decisions just makes their own decision based on their own experience or their own opinion a lot of the time. So I don't, it's my impression that often my more senior, my consultants did not appreciate, they don't appreciate the guidelines..."</i> (Registrar, remote)<br><br><i>"So I just didn't know if we, there was any point in us actually using the resource because it was just something that we already knew."</i> (NUM, rural)                                                                                                                                                                                                                                                                                                                                                                           |
|                          | Transience                             | <i>"Out here we have a very transient medical population, and our nursing staff change quite a bit as well. Probably more than most departments and I think that that is part of the problem, I'm the only consistent person that's been here in the last twelve months."</i> (Registrar, remote)                                                                                                                                                                                                                                                                                                                                                                                                                                                                                                                                                                                                                                                        |
|                          |                                        |                                                                                                                                                                                                                                                                                                                                                                                                                                                                                                                                                                                                                                                                                                                                                                                                                                                                                                                                                          |



1  
2  
3 suboptimal pharmacy presence on the ward owing to staffing issues and ward sizing.  
4

5 Similarly, across all participants, the main explanation for a lack of engagement with the  
6 materials was related to staff turn-over or low staff numbers that involved constantly re-  
7 training new staff or the need for more support.  
8  
9  
10

## 11 **DISCUSSION**

12  
13 This research used a decision-sampling framework and person-based approach to develop  
14 and evaluate a multifaceted intervention package for improved timely and safe switching  
15 from IV to oral antibiotics in children. The four-phase approach used in this research was  
16 successful in guiding the creation, review, adjustment, and evaluation of materials through a  
17 user-led focus. The initial review process provided wide-ranging feedback regarding the  
18 efficacy of the materials, and importantly provided an avenue for users to make suggestions  
19 for the materials that were tailored to their own sites, teams, and knowledge. Indigenous  
20 health workers provided the most extensive feedback, recognising that the parent/guardian  
21 leaflet was unlikely to have the intended impact among many Aboriginal and Torres Strait  
22 Islander parent/guardians. This was due to a variety of differences, but particularly  
23 identification that their communities would be more likely to learn and pass on knowledge  
24 visually and through conversation in culturally appropriate language. Subsequently, an  
25 Indigenous paediatric medical doctor led the creation of a video providing culturally  
26 appropriate information regarding antibiotic switching.  
27  
28  
29  
30  
31  
32  
33  
34  
35  
36  
37  
38  
39  
40  
41  
42  
43  
44  
45  
46  
47

48 After 6-months of using the intervention materials, evaluations from various health  
49 practitioners revealed three overarching themes regarding the intervention and decision-aids:  
50 the application of materials, education and support, and team dynamics within and between  
51 hospitals. Overall, the intervention materials were viewed as aiding and empowering  
52 antibiotic therapy decision-making, assisting clinical decisions among all participants, and  
53 were particularly helpful at supporting junior doctors. The materials were used differently by  
54  
55  
56  
57  
58  
59  
60

1  
2  
3 each practitioner group to influence or support their own or others' decisions. Those who  
4  
5 discussed using them in their own practice were most frequently junior doctors, nurses, and  
6  
7 pharmacists, who felt they increased their individual capacity to influence antibiotic decision-  
8  
9 making. This increased professional confidence and knowledge is likely to lead to more  
10  
11 proactive attitudes and switching behaviours, where previously there has been resistance  
12  
13 [17,18]. Of the physical supporting material, while the most popular material was the *STOP*  
14  
15 *poster*, most were seen as helpful for making switching decisions, or for communicating them  
16  
17 to other healthcare workers and patient-guardians. Importantly, many participants felt that the  
18  
19 intervention increased their knowledge of AMS practices, their ability to educate others,  
20  
21 empowered them or others to make decisions (including presenting decisions to seniors), and  
22  
23 assisted with AMS practice change. A key to their engagement appeared to be the presence of  
24  
25 materials in various strategic places, such as placement in medical charts and pinned on  
26  
27 walls. Having materials available at the most impactful locations meant that AMS was  
28  
29 conveniently visible and could be kept in mind during prescribing, and overall, that switching  
30  
31 information was memorable to key healthcare workers.  
32  
33  
34  
35  
36  
37

38 Similar to previous research, the most frequently highlighted barriers to uptake and  
39  
40 engagement with the intervention were structural [5,7]. Most hospital sites noted difficulties  
41  
42 with the hierarchy of medical engagement. For some, mainly registrars, there were  
43  
44 difficulties with high turnover of consultants and senior medical staff, such that medical  
45  
46 teams did not have consistent leadership and the support to utilize interventions. This was  
47  
48 also often recognized concerning pharmacy support, including from pharmacists themselves,  
49  
50 with similar issues regarding lack of support stemming from high turnover or smaller wards  
51  
52 at regional hospitals [7,18]. For others there was a feeling of opposition, or a lack of  
53  
54 appreciation, of the guidelines and materials from senior consultants who tended to  
55  
56 preference their knowledge and experience over formal guidelines [6,20]. While it is unclear  
57  
58  
59  
60

1  
2  
3 whether this practice influenced others, it may lead to reduced confidence, particularly  
4 among junior doctors, in making or presenting switching decisions to senior consultants.  
5  
6  
7

8 Key barriers to implementation of AMS practices in rural and regional Australia, and  
9 globally, have been identified as a lack of access to AMS support, education and training, and  
10 difficulties attracting and retaining staff, particularly staff with AMS expertise [5–7,18].  
11  
12

13 Promisingly, our results show that access to tailored AMS support and appropriate resources  
14 can improve education and increase internal training of AMS practices across a broad array  
15 of health practitioners. While staff retention was still identified as a problem at all sites,  
16 though particularly in rural and remote areas, the impact of staff turnover was lessened by  
17 broad training and support to health practitioners at multiple levels, including registered  
18 nurses, junior resident medical officers, pharmacists, and registrars.  
19  
20  
21  
22  
23  
24  
25  
26  
27  
28

### 29 **Strengths and limitations**

30  
31 Limitations of our study were the small number of participating stakeholders and lack of  
32 input from patient-guardians and carers during the post-intervention evaluation (phase 4). A  
33 lack of patient-guardians included in this phase means we do not know the extent to which  
34 the patient-guardian leaflet was useful in informing their understanding of the switching  
35 process. This should be a priority in future research to ensure patient-guardian materials  
36 continue to be adapted to suit their needs. Furthermore, although Aboriginal and Torres Strait  
37 Islander Liaison Officers provided feedback in the initial phases of the project, they were not  
38 included in the post-evaluation as they were not involved in delivery of direct patient care,  
39 treatment decisions, and the use of the intervention materials. However, doing so would have  
40 provided further insight regarding how the Indigenous patient-guardian video could have  
41 affected patient care if it was used. A secondary pre-intervention evaluation of stakeholders  
42 following adaption of the resources in phase 3 would also likely have assisted with  
43 understanding barriers to access the newer materials, like the video. This may have identified  
44  
45  
46  
47  
48  
49  
50  
51  
52  
53  
54  
55  
56  
57  
58  
59  
60

1  
2  
3 further avenues for education, particularly regarding Indigenous patient/guardians that could  
4 have been included in health worker education. Nevertheless, the interviewees were recruited  
5 from a range of regional areas, professions (including nurses and pharmacists), and are  
6 representative of a multidisciplinary team involved in caring for sick children. This approach  
7 shed light on the experiences of health workers in their preferences for materials and how  
8 those materials were used to aid antibiotic IV-to-oral switching by varying discipline and  
9 health context.  
10  
11  
12  
13  
14  
15  
16  
17  
18  
19

20 Although our study was conducted in rural and regional hospitals in one Australian  
21 state, we believe the findings are relevant for other settings in Australia and within similar  
22 health systems worldwide. Notably, a strength of our study is the involvement of local  
23 clinicians in the pre- and post-intervention evaluation, which may enable sustainability of the  
24 intervention. In particular, this study utilized a package of interventions which provided  
25 health workers with the opportunity to tailor the available tools to their practice setting and  
26 patient's requirements which is more realistic of a real-world situation and multifaceted  
27 approach more likely to be effective [21,22]. Further, while we found consistent cross-site  
28 utilisation and acceptance of the materials, we are yet to grapple with the global change to  
29 digital medication charts and systems where prompt fatigue may render interventions like  
30 'chart stickers' and visual reminders difficult to implement. Only one site included in this  
31 study had transitioned to a digital chart system. Although they were able to implement the  
32 materials flexibly, through posters near computers and links to guidelines, we need further  
33 research to understand the impact of digital systems in the implementation of future  
34 interventions [23]. Importantly, improving antibiotic prescribing and management at the  
35 point of care requires complementary strategies: (1) changing clinician behaviour and (2)  
36 educating patients and families about the role of antibiotics in medical care and their own  
37 wellbeing [24].  
38  
39  
40  
41  
42  
43  
44  
45  
46  
47  
48  
49  
50  
51  
52  
53  
54  
55  
56  
57  
58  
59  
60

## CONCLUSIONS

When guided by local clinicians and stakeholders, offering multifaceted intervention package to facilitate a timely switch from IV-to-oral antibiotic therapy in paediatric patients is successfully able to inform and adjust practice across hospital teams. Although more needs to be done to ensure all healthcare workers can embrace and support new interventions in a hospital setting, another main and not easily addressable issue remains the lack of sufficient long-term staff and their perpetually high turnover in regional hospitals. This is a major barrier to uptake in the long term. Future studies should explore how these interventions can be embedded within the healthcare infrastructure of a hospital and rely less on championship by individual staff.

## Declarations

## Data availability statement

The datasets used and analysed during the current study are available from the corresponding author on reasonable request.

## Competing interests

None.

## Funding

This work was supported by a Children's Hospital Foundation grant (50232). The Children's Hospital Foundation had no involvement in any aspect of the research or decision to submit this manuscript for publication.

## Contributors

The study was led by MA with MvD, JC, AI, and NG contributing to the conception of the study. MA reviewed the articles and extracted information for review and creation of resources. VL was responsible for the pre-intervention interviews, these were analysed by VL and LS. MA and MvD adapted resources from the pre-intervention interview comments. Post-intervention interviews were completed by LS and analyses was completed by LS and JF. The manuscript was led and written by LS. All authors approved the final manuscript as submitted and agree to be accountable for all aspects of the work in ensuring that questions related to the accuracy or integrity of any part of the work are appropriately investigated and resolved.

## Acknowledgements

We express our gratitude to Dr Andree Wade and Dr Gary Dyari Wood who generously conducted interviews. We are grateful to the health practitioners, Indigenous liaison officers and patient-guardians who generously shared their views and time with us during the stages of this research, providing valuable contributions.

## References

- 1 Cyriac JM, James E. Switch over from intravenous to oral therapy: A concise overview. *Journal of Pharmacology and Pharmacotherapeutics* Published Online First: 2014. doi:10.4103/0976-500X.130042
- 2 Mertz D, Koller M, Haller P, *et al.* Outcomes of early switching from intravenous to oral antibiotics on medical wards. *Journal of Antimicrobial Chemotherapy* Published Online First: 2009. doi:10.1093/jac/dkp131
- 3 Kopsidas I, Vergnano S, Spyridis N, *et al.* A survey on national pediatric antibiotic stewardship programs, networks and guidelines in 23 European countries. *Pediatric Infectious Disease Journal* 2020;**39**:E359–62. doi:10.1097/INF.0000000000002835
- 4 Australian Commission on Safety and Quality in Health Care. *National Safety and Quality Health Service Standards*. Sydney: : ACSQHC 2021.
- 5 Broom J, Broom A, Adams K, *et al.* What prevents the intravenous to oral antibiotic switch? A qualitative study of hospital doctors' accounts of what influences their clinical practice. *Journal of Antimicrobial Chemotherapy* 2016;**71**:2295–9. doi:10.1093/jac/dkw129
- 6 James R, Luu S, Avent M, *et al.* A mixed methods study of the barriers and enablers in implementing antimicrobial stewardship programmes in Australian regional and rural hospitals. *Journal of Antimicrobial Chemotherapy* 2015;**70**:2665–70. doi:10.1093/jac/dkv159
- 7 Bishop JL, Schulz TR, Kong DCM, *et al.* Qualitative study of the factors impacting antimicrobial stewardship programme delivery in regional and remote hospitals. *Journal of Hospital Infection* 2019;**101**:440–6. doi:10.1016/j.jhin.2018.09.014
- 8 Bishop JL, Schulz TR, Kong DCM, *et al.* Similarities and differences in antimicrobial prescribing between major city hospitals and regional and remote hospitals in Australia. *International Journal of Antimicrobial Agents* Published Online First: 2019. doi:10.1016/j.ijantimicag.2018.10.009
- 9 Bryant PA. Antimicrobial stewardship resources and activities for children in tertiary hospitals in Australasia: A comprehensive survey. *Medical Journal of Australia* 2015;**202**:134–9. doi:10.5694/mja13.00143
- 10 Osowicki J, Gwee A, Noronha J, *et al.* Australia-wide point prevalence survey of the use and appropriateness of antimicrobial prescribing for children in hospital. *Medical Journal of Australia* 2014;**201**:657–62. doi:10.5694/mja13.00154
- 11 Bryant PA, Morgan N, Clifford V, *et al.* A whole of country analysis of antimicrobial stewardship resources, activities, and barriers for children in hospitals in Australia. In: *Open Forum Infect Diseases*. 2018. S108–9. doi:https://dx.doi.org/10.1093%2Fofid%2Fofy210.268
- 12 Gerber JS, Jackson MA, Tamma PD, *et al.* Policy Statement: Antibiotic stewardship in pediatrics. *Journal of the Pediatric Infectious Diseases Society* 2021;**10**:641–9. doi:10.1093/jpids/piab002



- 13 Avent ML, Lee XJ, Irwin AD, *et al.* An innovative Antimicrobial Stewardship Program for children in remote and regional areas in Queensland, Australia: optimizing antibiotic use through timely intravenous-to-oral conversion. *Journal of Global Antimicrobial Resistance* 2021;:0–21. doi:10.1016/j.jgar.2021.11.014
- 14 Mackie TI, Schaefer AJ, Hyde JK, *et al.* The decision sampling framework: a methodological approach to investigate evidence use in policy and programmatic innovation. *Implementation Science* 2021;16:1–17. doi:10.1186/s13012-021-01084-5
- 15 Yardley L, Morrison L, Bradbury K, *et al.* The person-based approach to intervention development: Application to digital health-related behavior change interventions. *Journal of Medical Internet Research* 2015;17:e30. doi:10.2196/jmir.4055
- 16 Charmaz K. Theoretical Sampling, Saturation and Sorting. In: *Constructing grounded theory / Kathy Charmaz*. London: Sage 2014.
- 17 Broom A, Broom J, Kirby E. Cultures of resistance? A Bourdieusian analysis of doctors' antibiotic prescribing. *Social Science and Medicine* 2014;110:81–8. doi:10.1016/j.socscimed.2014.03.030
- 18 Broom A, Broom J, Kirby E, *et al.* What role do pharmacists play in mediating antibiotic use in hospitals? A qualitative study. *BMJ open* 2015;5:e008326. doi:10.1136/bmjopen-2015-008326
- 19 Byrne D. A worked example of Braun and Clarke's approach to reflexive thematic analysis. *Quality & Quantity* 2022;56:1391–412. doi:10.1007/s11135-021-01182-y
- 20 Lee SL, Azmi S, Wong PS. Clinicians' knowledge, beliefs and acceptance of intravenous-to-oral antibiotic switching, hospital Pulau Pinang. *Medical Journal of Malaysia* 2012.
- 21 Gulliford MC, Prevost AT, Charlton J, *et al.* Effectiveness and safety of electronically delivered prescribing feedback and decision support on antibiotic use for respiratory illness in primary care: REDUCE cluster randomised trial. *BMJ (Online)* 2019;364. doi:10.1136/bmj.1236
- 22 Little P, Stuart B, Francis N, *et al.* Effects of internet-based training on antibiotic prescribing rates for acute respiratory-tract infections: A multinational, cluster, randomised, factorial, controlled trial. *The Lancet* 2013;382:1175–82. doi:10.1016/S0140-6736(13)60994-0
- 23 Backman R, Bayliss S, Moore D, *et al.* Clinical reminder alert fatigue in healthcare: a systematic literature review protocol using qualitative evidence. *Systematic Reviews* 2017;6:255. doi:10.1186/s13643-017-0627-z
- 24 Tamma PD, Cosgrove SE. Addressing the appropriateness of outpatient antibiotic prescribing in the United States an important first step. *JAMA - Journal of the American Medical Association* Published Online First: 2016. doi:10.1001/jama.2016.4286



1  
2  
3 Figure title  
4

5 **Figure 1. Four phases of the development and evaluation of paediatric intravenous-to-**  
6 **oral switch materials**  
7  
8  
9

10  
11  
12  
13  
14  
15  
16  
17  
18  
19  
20  
21  
22  
23  
24  
25  
26  
27  
28  
29  
30  
31  
32  
33  
34  
35  
36  
37  
38  
39  
40  
41  
42  
43  
44  
45  
46  
47  
48  
49  
50  
51  
52  
53  
54  
55  
56  
57  
58  
59  
60

For peer review only

1  
2  
3  
4  
5  
6  
7  
8  
9  
10  
11  
12  
13  
14  
15  
16  
17  
18  
19  
20  
21  
22  
23  
24  
25  
26  
27  
28  
29  
30  
31  
32  
33  
34  
35  
36  
37  
38  
39  
40  
41  
42  
43  
44  
45  
46  
47  
48  
49  
50  
51  
52  
53  
54  
55  
56  
57  
58  
59  
60

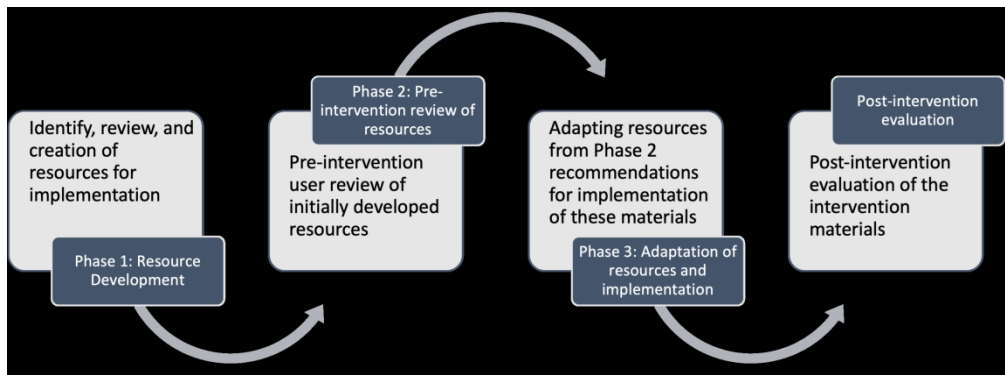

Four phases of the development and evaluation of pediatric intravenous to oral switch materials

226x83mm (330 x 330 DPI)

## Pre-intervention materials reviewed

The reviewed intervention materials are presented in the following order:

1. ?STOP chart: An IV to oral chart (?STOP) to guide practitioner's decision-making, and associated lanyards of the decision-making chart
2. Flow chart: A flow chart for identifying eligible children for IV to oral antibiotics conversion, along with a table for identifying suitable oral antibiotic agents when making the switch
3. Patient chart labels
4. Fact sheet: An IV to oral conversion fact sheet for healthcare workers
5. Making the switch: Changing from intravenous to oral antibiotics.

For peer review only

# Can IV antibiotics ?STOP

## IV to Oral Switch guideline for patients

Version 1.0  
Effective: 25/7/2018

Use this guideline to identify patients who have received ≥48 hours of IV therapy that may be suitable to STOP antibiotics or SWITCH to oral therapy.

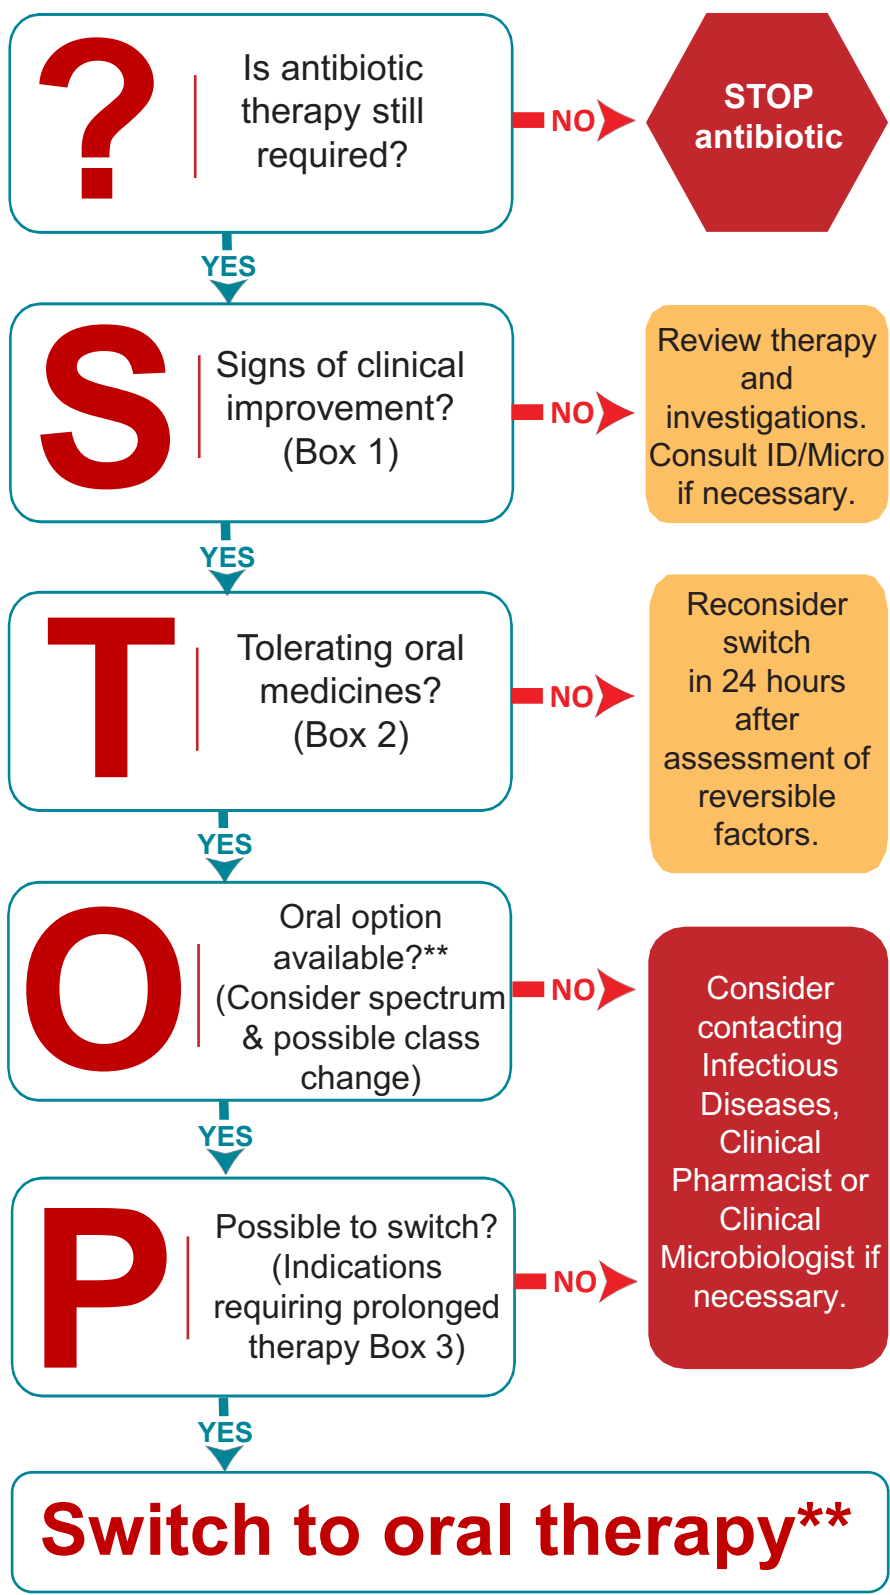

**Box 1**

**Signs of clinical improvement**

- Afebrile (temp >36°C and <38°C for past 24-48 hours)
- Improved vital signs (BP, HR, RR)

**Box 2**

**Tolerating oral medications**

- Patient is tolerating oral food/fluid\*
- Oral absorption is not compromised (e.g. diarrhoea, vomiting, malabsorptive disorder, unconscious, swallowing disorder)

\*If patient is NBM for a procedure, prescribed medications should be given unless otherwise directed

**Box 3**

**Prolonged parenteral therapy is required for the following indications:**

- Deep-seated infection e.g. abscess/empyema
- *Staphylococcus aureus* bacteraemia
- Meningitis or encephalitis
- Fungi or yeasts in blood (fungaemia)
- Septic arthritis
- Osteomyelitis
- Endocarditis
- Necrotising soft tissue infection
- Infected implant or prosthesis

\*\* For oral options refer to your local guidelines or the Therapeutic Guidelines: Antibiotic

Flowchart for Identification of Children Suitable for Early Switch to Oral Antibiotics

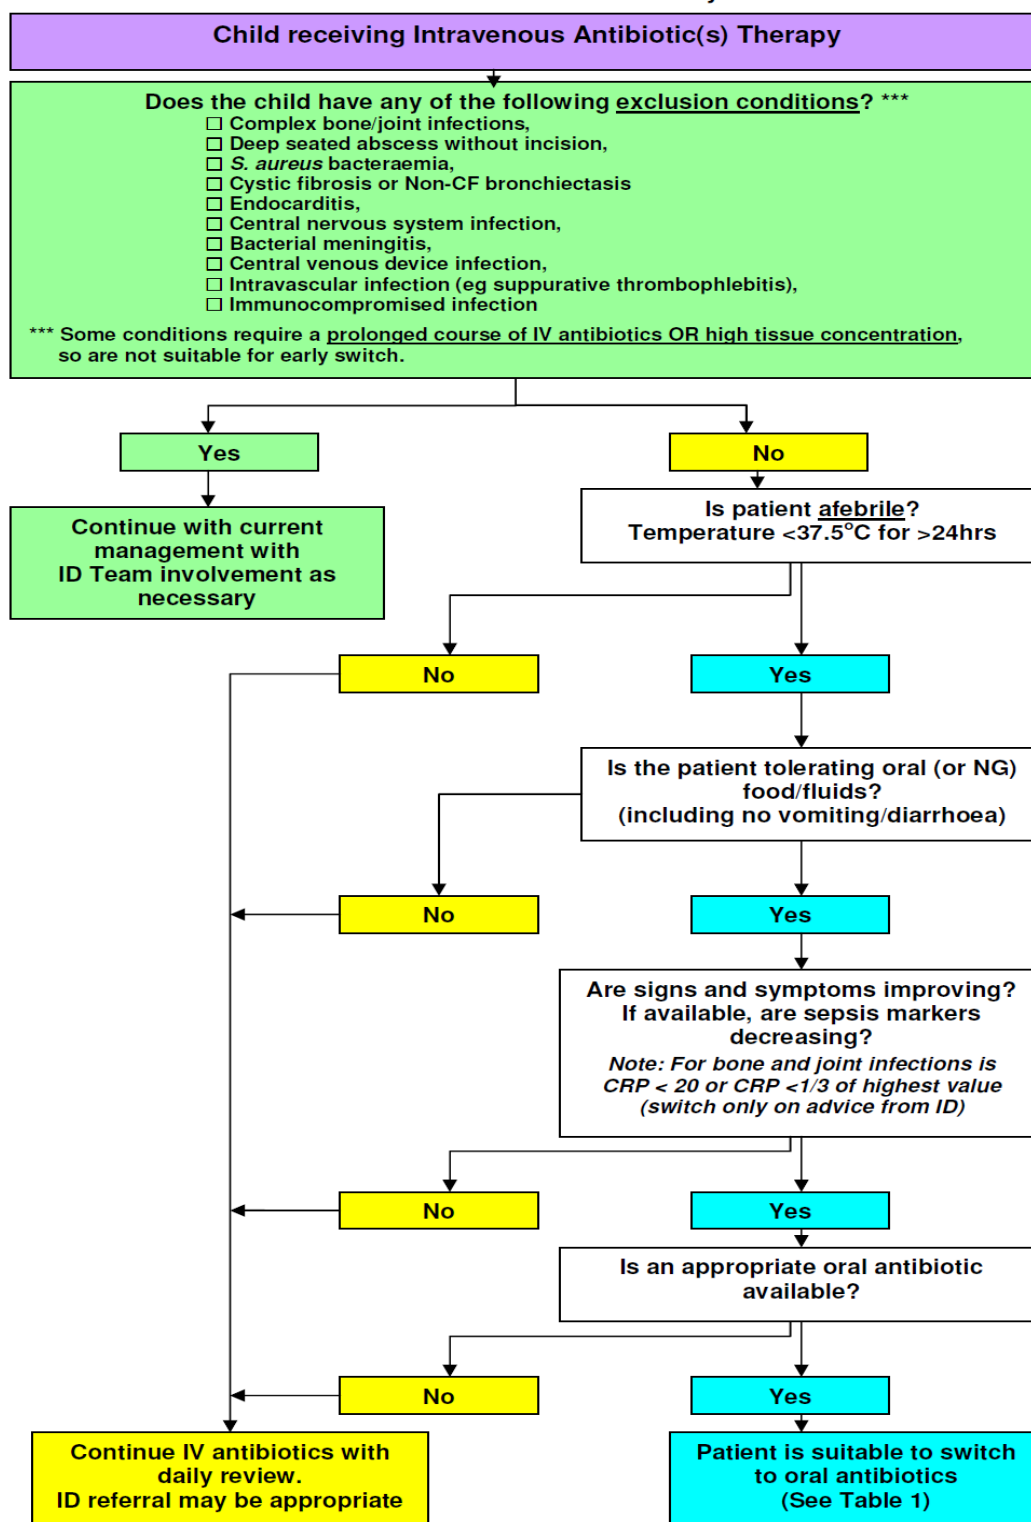

Role of the Healthcare Team

## Suitable Agents

antibiotics considered equivalent and suitable for IV to oral switch are listed in Table 1. If no equivalent oral formulation available, the choice of antimicrobial should be based on advice from Paediatric ID.

Table 1:

### Table 1: Suitable Agents for infants (>1 month of age) and children

Empiric antibiotics considered equivalent and suitable for IV to oral switch are listed in Table 1. If no equivalent oral formulation available, the choice of antimicrobial should be based on advice from Paediatric ID specialist.

| Infection                                 | Intravenous (IV)                                                                                                                                                                        |                                                                                                                                                                                                                                              | Oral (PO)                                                   |                                                                                                                                                       |
|-------------------------------------------|-----------------------------------------------------------------------------------------------------------------------------------------------------------------------------------------|----------------------------------------------------------------------------------------------------------------------------------------------------------------------------------------------------------------------------------------------|-------------------------------------------------------------|-------------------------------------------------------------------------------------------------------------------------------------------------------|
|                                           | 1st CHOICE ANTIMICROBIAL                                                                                                                                                                | Alternative antibiotic in the event of immediate type (eg. anaphylaxis) or delayed type (eg. rash) hypersensitivity to penicillins and cephalosporins                                                                                        | 1st CHOICE ANTIMICROBIAL                                    | Alternative antibiotic in the event of immediate type (eg. anaphylaxis) or delayed type (eg. rash) hypersensitivity to penicillins and cephalosporins |
| <b>Community acquired pneumonia (CAP)</b> | Benzylpenicillin IV<br>60mg/kg/dose every 6 hourly<br>(Max 2.4gram/dose)<br><br>If Mycoplasma suspected:<br><br>Add Roxithromycin PO<br>4mg/kg/dose every 12 hourly<br>(Max 150mg/dose) | Delayed type hypersensitivity,<br>Cefotaxime IV 50mg/kg/dose<br>every 6 hourly (Max<br>2gram/dose) OR<br><br>Ceftriaxone IV 50mg/kg/dose<br>every 12 hourly (Max 2gram/<br>dose).<br><br>Immediate type hypersensitivity,<br>seek ID advice. | Amoxicillin oral 25mg/kg every<br>8 hourly (Max 1gram/dose) | For immediate type hypersensitivity to<br>penicillins,<br><br>use oral Roxithromycin 4mg/kg/dose<br>every 12 hourly (Max 150mg/dose).                 |

|                                                                              |                                                                                                                                                  |                                                                                                                                                                                                                                                  |                                                                                                                                                                                                                          |                                                                                                                                                              |
|------------------------------------------------------------------------------|--------------------------------------------------------------------------------------------------------------------------------------------------|--------------------------------------------------------------------------------------------------------------------------------------------------------------------------------------------------------------------------------------------------|--------------------------------------------------------------------------------------------------------------------------------------------------------------------------------------------------------------------------|--------------------------------------------------------------------------------------------------------------------------------------------------------------|
|                                                                              | If Staphylococcal Pneumonia suspected:<br><br>Add Flucloxacillin IV 50mg/kg/dose IV every 4 hours (Max 2gram/dose) and seek ID advice.           | Delayed or immediate type hypersensitivity,<br><br>Lincomycin IV 15mg/kg/dose every 8 hourly (Max 1.2gram/dose) and seek ID advice.                                                                                                              |                                                                                                                                                                                                                          |                                                                                                                                                              |
| <b>Infection</b>                                                             | <b>Intravenous (IV)</b>                                                                                                                          |                                                                                                                                                                                                                                                  | <b>Oral (PO)</b>                                                                                                                                                                                                         |                                                                                                                                                              |
|                                                                              | <b>1st CHOICE ANTIMICROBIAL</b>                                                                                                                  | <b>Alternative antibiotic in the event of immediate type (eg. anaphylaxis) or delayed type (eg. rash) hypersensitivity to penicillins and cephalosporins</b>                                                                                     | <b>1st CHOICE ANTIMICROBIAL</b>                                                                                                                                                                                          | <b>Alternative antibiotic in the event of immediate type (eg. anaphylaxis) or delayed type (eg. rash) hypersensitivity to penicillins and cephalosporins</b> |
| <b>Moderate to severe cellulitis and periorbital cellulitis (Hib immune)</b> | Flucloxacillin IV 50mg/kg/dose IV every 6 hours (Max 2gram/dose)<br><br>If <5 years of age and not Hib immune, seek ID advice.                   | <b>Delayed type hypersensitivity,</b><br><br>Cephazolin IV 50mg/kg/dose every 8 hourly (Max 2gram/dose)<br><br><b>Immediate type hypersensitivity,</b><br><br>Lincomycin IV 15mg/kg/dose IV every 8 hours (Max 1.2 gram/dose) and seek ID advice | Cephalexin PO 25mg/kg/dose orally four times a day (Max 1gram/dose)<br><br><b>OR</b><br><br><b>For children who can swallow capsules:</b><br><br>Flucloxacillin PO 25mg/kg/dose orally four times a day (Max 1gram/dose) | <b>Immediate type hypersensitivity,</b><br><br>Trimethoprim/ Sulfamethoxazole PO 4mg/kg/dose orally twice daily (Max 160mg/dose Trimethoprim component)      |
|                                                                              | <b>If at risk of nmMRSA or if family/personal history of boils (Previous nmMRSA, History of boils or Aboriginal or Pacific islander descent)</b> | <b>Immediate type hypersensitivity,</b><br><br>Lincomycin IV 15mg/kg/dose IV every 8 hours (Max 1.2                                                                                                                                              | <b>If at risk of nmMRSA or if family/personal history of boils (Previous nmMRSA, History of boils or Aboriginal or Pacific islander descent)</b>                                                                         | <b>Immediate type hypersensitivity,</b><br><br>Trimethoprim/ Sulfamethoxazole PO 4mg/kg/dose orally twice daily (Max 160mg/dose Trimethoprim component)      |

1  
2  
3  
4  
5  
6  
7  
8  
9  
10  
11  
12  
13  
14  
15  
16  
17  
18  
19  
20  
21  
22  
23  
24  
25  
26  
27  
28  
29  
30  
31  
32  
33  
34  
35  
36  
37  
38  
39  
40  
41  
42  
43  
44  
45  
46

|  |                                                                     |                               |                                                                                                                                                                                             |  |
|--|---------------------------------------------------------------------|-------------------------------|---------------------------------------------------------------------------------------------------------------------------------------------------------------------------------------------|--|
|  | Add Lincomycin IV 15mg/kg/dose IV every 8 hours (Max 1.2 gram/dose) | gram/dose) and seek ID advice | Clindamycin PO 7.5mg/kg/dose orally four times a day (Max 450mg/dose)<br><br>OR<br>Trimethoprim/ Sulfamethoxazole PO 4mg/kg/dose orally twice daily (Max 160mg/dose Trimethoprim component) |  |
|--|---------------------------------------------------------------------|-------------------------------|---------------------------------------------------------------------------------------------------------------------------------------------------------------------------------------------|--|

| Infection | IV                                                                                                                                                                                                               |                                                                                                                                                                 | Oral                                                |                                                                                                                                                       |
|-----------|------------------------------------------------------------------------------------------------------------------------------------------------------------------------------------------------------------------|-----------------------------------------------------------------------------------------------------------------------------------------------------------------|-----------------------------------------------------|-------------------------------------------------------------------------------------------------------------------------------------------------------|
|           | 1st CHOICE ANTIMICROBIAL                                                                                                                                                                                         | Alternative antibiotic in the event of immediate type (eg. anaphylaxis) or delayed type (eg. rash) hypersensitivity to penicillins and cephalosporins           | 1st CHOICE ANTIMICROBIAL                            | Alternative antibiotic in the event of immediate type (eg. anaphylaxis) or delayed type (eg. rash) hypersensitivity to penicillins and cephalosporins |
| CAP       | <p>Benzylpenicillin IV 60mg/kg/dose every 6 hours (Max 2.4gram/dose)</p> <p>If Mycoplasma suspected:<br/>Add Roxithromycin PO 4mg/kg/dose every 12 hours (Max 150mg/dose)</p> <p>If Staphylococcal Pneumonia</p> | <p>Delayed type hypersensitivity, Cefotaxime IV.</p> <p>Immediate type hypersensitivity, seek ID advice.</p> <p>Delayed or immediate type hypersensitivity,</p> | Amoxycillin oral 25mg/kg (Max 1gram) every 8 hourly | For immediate type hypersensitivity to penicillins, use oral Roxithromycin.                                                                           |



|  |                                                                                                                                                                                                                                                                                                                                                          |                                                                                                                                   |                                                                                                                                                                                                                                                                                                                                                                                                                                                                                                                                                                                                                                          |                                                                               |
|--|----------------------------------------------------------------------------------------------------------------------------------------------------------------------------------------------------------------------------------------------------------------------------------------------------------------------------------------------------------|-----------------------------------------------------------------------------------------------------------------------------------|------------------------------------------------------------------------------------------------------------------------------------------------------------------------------------------------------------------------------------------------------------------------------------------------------------------------------------------------------------------------------------------------------------------------------------------------------------------------------------------------------------------------------------------------------------------------------------------------------------------------------------------|-------------------------------------------------------------------------------|
|  | <p>suspected:<br/>Add Flucloxacillin IV<br/>50mg/kg/dose IV<br/>every 4 hours (Max<br/>2gram/dose)</p>                                                                                                                                                                                                                                                   | <p>Lincomycin IV</p>                                                                                                              |                                                                                                                                                                                                                                                                                                                                                                                                                                                                                                                                                                                                                                          |                                                                               |
|  | <p>Flucloxacillin IV<br/>50mg/kg/dose IV<br/>every 6 hours<br/>(Max 2gram/dose)<br/><br/>If at risk of nmMRSA<br/>or if family/personal<br/>history of boils<br/>(Previous nmMRSA,<br/>History of boils or<br/>Aboriginal or Pacific<br/>islander descent)<br/><br/>Add Lincomycin IV<br/>15mg/kg/dose IV<br/>every 8 hours ( Max<br/>1.2 gram/dose)</p> | <p>Delayed type hypersensitivity,<br/>Cephazolin IV<br/>Immediate type hypersensitivity,<br/>Lincomycin IV and seek ID advice</p> | <p>Cephalexin PO 25mg/kg/dose<br/>orally four times a day (Max<br/>1000mg/dose)<br/><br/>OR Flucloxacillin PO<br/>25mg/kg/dose orally four times a<br/>day (Max 1000mg/dose) (For<br/>children who can swallow<br/>capsules)<br/><br/>If at risk of nmMRSA or if<br/>family/personal history of boils<br/>(Previous nmMRSA, History of<br/>boils or Aboriginal or Pacific<br/>islander descent)<br/><br/>Clindamycin PO 7.5mg/kg/dose<br/>orally four times a day (Max<br/>450mg/dose)<br/><br/>OR<br/>Trimethoprim/ Sulfamethoxazole<br/>PO<br/><br/>4mg/kg/dose orally twice daily<br/>(Max 160mg/dose Trimethoprim<br/>component)</p> | <p>Immediate type hypersensitivity,<br/>Trimethoprim/ Sulfamethoxazole PO</p> |



1  
2  
3  
4 patient meets. The stickers have been designed to fit within the ‘issues identified’ and  
5 ‘proposed action’ boxes on the MAP form. It is intended that the sticker will be a permanent  
6 sticker that cannot be removed from the patient’s record.  
7

8 Communicate this information with the Treating Consultant/ Medical officer (e.g. page,  
9 verbally).  
10  
11  
12  
13  
14  
15  
16  
17  
18  
19  
20  
21  
22  
23  
24  
25  
26  
27  
28  
29  
30  
31  
32  
33  
34  
35  
36  
37  
38  
39  
40  
41  
42  
43  
44  
45  
46  
47  
48  
49  
50  
51  
52  
53  
54  
55  
56  
57  
58  
59  
60

For peer review only

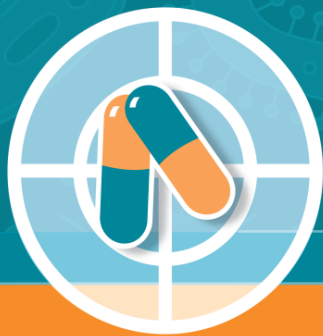

## Queensland Statewide Antimicrobial Stewardship Program

PRESERVING EFFECTIVE ANTIBIOTICS

# AMS Pearls

AMS Pearls: IV to PO. Effective 07/2018.

## Can IV antibiotics ?STOP

### Did You Know?

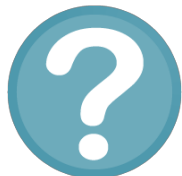

In many indications, the use of IV antibiotic therapy exclusively is NOT more effective than oral therapy when suitable oral agents are available.<sup>1-2</sup>

Additionally, NOT switching your patient from IV antibiotics to oral therapy appropriately and in a timely manner can increase IV-associated morbidity, result in a longer total duration of antibiotic therapy and increase the length of the hospital stay.<sup>3</sup>

### Consider This

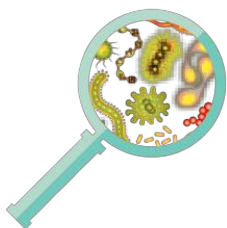

- IV to oral switch decreases the risk of IV line-associated infections such as local cellulitis, abscess formation, septic thrombophlebitis, line sepsis, and endocarditis.<sup>4</sup>
- An appropriate switch to oral antibiotics results in BOTH good clinical outcomes AND a substantial reduction in antibiotic expenses in many cases.<sup>3,4</sup>

For example: appropriately timed switch from IV to oral antibiotics in patients with severe community acquired pneumonia can decrease length of hospital stay by 2-4 days whilst maintaining clinical cure rates.<sup>5-7</sup>

### Take Action Now!

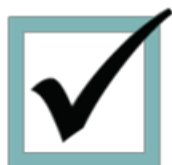

- Review all patients at 48 hours from commencement of IV antibiotics. Refer to your local IV to PO guideline for advice.
- See the Queensland Statewide AMS (QSAMSP) website for IV to PO clinical tools such as poster, lanyard and chart stickers.
- Contact your local AMS team or QSAMSP for assistance in implementation.

Contact us

(07) 3646 1886

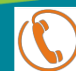

statewide.ams@health.qld.gov.au

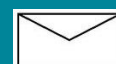

Disclaimer: This fact sheet is intended as a guide only and does not equate to individual patient level expert opinion. Interpretation should always be taken in context with the patient's current condition and formal clinical review.

Queensland Health employees join:  
Queensland Statewide AMS Program

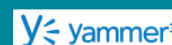

## Reference

1. Li HK, Agweyu A, English M, Bejon P. An unsupported preference for intravenous antibiotics. *PLoS Med*. 2015;12(5):e1001825
2. Schouten JA, Hulscher M, Natsch S, Kullber B, van der Meer J, Grol R. Barriers to optimal antibiotic use for community-acquired pneumonia at hospitals: a qualitative study. *Qual Saf Health Care* 2007;16:143-149.
3. Broom J, Broom A, Adams K, Plage S. What prevents the intravenous to oral antibiotic switch? A qualitative study of hospital doctors' accounts of what influences their clinical practice. *J Antimicrob Chemother*. 2016;71(8):2295-9.
4. Ramirez JA, Vargas S, Ritter GW, et al. Early Switch From Intravenous to Oral Antibiotics and Early Hospital Discharge: A Prospective Observational Study of 200 Consecutive Patients With Community-Acquired Pneumonia. *Arch Intern Med*. 1999;159(20):2449–2454. doi:10.1001/archinte.159.20.2449
5. Yaqub, & Khan, Z.. Comparison of Early Intravenous to Oral Switch Amoxicillin / Clavulanate with Parenteral Ceftriaxone in Treatment of Hospitalized Patients with Community Acquired Pneumonia. *Pak J Med Sci*. 2005;21(3):259-266.
6. Oosterheert JJ, Bonten MJM, Schneider MME, et al. Effectiveness of early switch from intravenous to oral antibiotics in severe community acquired pneumonia: multicentre randomised trial. *BMJ : British Medical Journal*. 2006;333(7580):1193. doi:10.1136/bmj.38993.560984.BE.
7. Fraser GL, Stogsdill P, Dickens JD, Wennberg DE, Smith RP, Prato BS. Antibiotic Optimization An Evaluation of Patient Safety and Economic Outcomes. *Arch Intern Med*. 1997;157(15):1689–1694. doi:10.1001/archinte.1997.00440360105012

# 1 MAKING THE SWITCH

## 2 CHANGING FROM INTRAVENOUS TO ORAL ANTIBIOTICS

### 3

### 4

### 5 INFORMATION FOR PARENTS AND CARERS

### 6

### 7

#### 8 **Why do we give your child antibiotics?**

9 Antibiotics are medicines used to treat infections  
10 caused by bacteria, and these infections are  
11 commonly seen in patients needing treatment in  
12 hospital.  
13

14 To manage serious bacterial infections, antibiotics are  
15 often given intravenously or “IV” (meaning through  
16 the vein via a drip) to begin. This is an effective way to  
17 get antibiotics into the blood system quickly, and  
18 reach the site of infection.  
19

20 IV antibiotics may also be used if:

- 21 • It is not possible or difficult to give antibiotics by  
22 mouth (e.g. difficulty swallowing)
- 23 • There are problems absorbing medicines from the  
24 stomach (e.g. vomiting)
- 25 • There are no antibiotics available that can be  
26 given by mouth for a particular infection

#### 27 **When is it safe to switch to oral antibiotics?**

28 In many common infections treated in hospitals,  
29 patients can, and should be, switched from IV to oral  
30 antibiotics. There are special criteria and checklists to  
31 make the right decisions about when it is safe and  
32 suitable to switch to oral antibiotics. This includes  
33 when:

- 34 • The patient is stable and their condition is  
35 improving (e.g. body temperature is getting back  
36 to normal)
- 37 • Other medicines can be taken by mouth without  
38 problems
- 39 • There are no problems with absorbing medicines  
40 taken by mouth
- 41 • The antibiotic needed is available in an oral form.  
42 In most cases this will be a syrup. If a syrup  
43 formulation is not available, tablets or capsules  
44 may be given instead. Your doctor, nurse or  
45 pharmacist can show you how to give this (e.g.  
46 crush tablet, dissolve in water), or teach your child  
47 how to swallow tablets and capsules whole.

- 48 • The patient is likely to be able to take the full  
49 course of antibiotics
- 50 • You understand the plan to change to an oral  
51 antibiotic and you are able to help where required.

Your child’s doctor will look at the need for IV  
antibiotics every day, and will talk to you about this.  
Please feel free to ask more questions if you have  
concerns about your child’s medicines.

#### 52 **Why should we switch to oral antibiotics?**

Taking medicines by mouth (orally) is the safest and  
easiest way to take most medicines. Every effort is  
made to switch patients to oral medicines as soon as  
possible.

The benefits of giving medicines orally include that:

- 53 • There is no need for an IV line or drip
- 54 • Your child may not need as many needles
- 55 • It is more comfortable
- 56 • There is less risk of irritation or infection from the  
57 line or drip
- 58 • Your child may be able to go home sooner

Generally, serious side effects from oral antibiotics are  
less common.

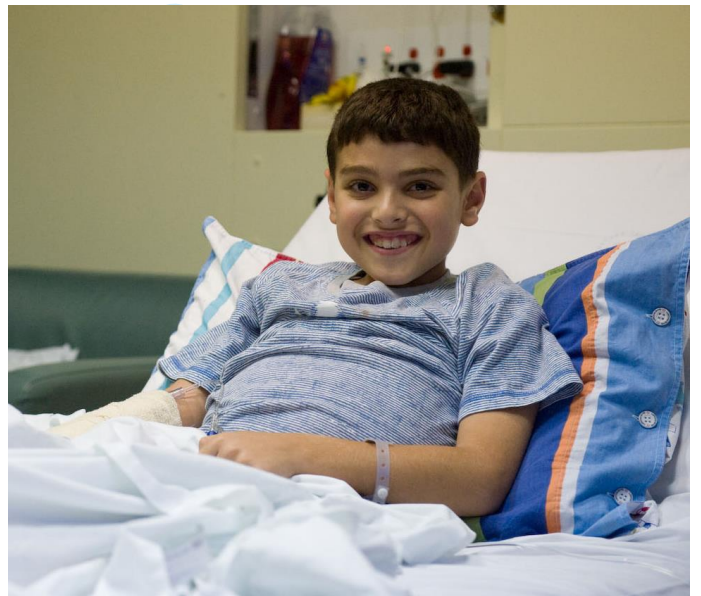



## What are the risks of switching to oral antibiotics?

There is a small chance the infection may get worse if oral antibiotics do not work. If this happens, your child may be given IV antibiotics again. If you have already gone home, you may need to come back to the hospital.

## What are the side effects of antibiotics?

Antibiotics can cause side effects, however, when antibiotics are necessary, the benefits far outweigh the risks.

Side effects can include stomach problems like diarrhoea, nausea and vomiting. Taking antibiotics, intravenously or orally, can affect the normal good gut bacteria.

For some children, probiotics may help to restore good gut bacteria; speak to your doctor for more information.

Less common, but more serious, side effects can be allergic reactions, such as hives (large, red, raised areas on the skin), fever and breathing problems.

If your child experiences any of these, stop taking the antibiotic and seek medical attention. The Consumer Medicine Information (CMI) leaflet that normally comes with the medicine also lists the most common side effects.

## You are part of the team making this decision

At this hospital, we encourage staff to provide parents and carers with information on antibiotics prescribed for their child, including when and why it has been started, potential side effects, the treatment plan and options, so you can help make decisions about your child's treatment.

If you have not been involved in these discussions, and wish to know more about your child's antibiotic treatment plan, please ask your hospital doctor, nurse or pharmacist.

Making the switch: Changing from intravenous to oral antibiotics  
Information for parents and carers

Released May 2018, © Clinical Excellence Commission 2018  
SHPN (CEC) 180346

## What you need to know before your child goes home

If your child has been given oral antibiotics to take at home, it is important that you follow the doctor's advice on when, how, and for how long your child should take them.

You can use the checklist below to make sure you have the information you need to keep giving antibiotics at home.

### Checklist

- Name of the antibiotic
- How much of the antibiotic to give your child. Plastic syringes or measuring cups should be used to measure liquid medicines.
- The times of day you need to give the antibiotic to your child
- If the antibiotic needs to be given on an empty stomach, or with food
- How many days to give the antibiotic for
- What to do if your child has a reaction to the antibiotic
- What to do if your child's condition worsens
- Who to call if you've gone home and you're worried about your child
- When you need to see your doctor again

#### Acknowledgement

The original form of this publication was provided by Sydney Children's Hospitals Network. Adapted with permission.

#### About the Quality Use of Antimicrobials in Healthcare Program

The CEC's Quality Use of Antimicrobials in Healthcare program aims to help NSW public hospitals develop ways of ensuring antibiotics are used properly and responsibly to improve patient care.

For further information on the program, please visit <http://www.cec.health.nsw.gov.au>

IV to oral conversion study: PHASE 2 pre-intervention review of materials

| Themes                                                                                           | Healthcare worker questions (concerning the fact sheet, patient chart labels, ?STOP chart & lanyards)                                                                                                                                                                                                                         | Patient guardian questions (concerning the guardian information sheet)                                                                                                                                                                                                                                                                                                                   |
|--------------------------------------------------------------------------------------------------|-------------------------------------------------------------------------------------------------------------------------------------------------------------------------------------------------------------------------------------------------------------------------------------------------------------------------------|------------------------------------------------------------------------------------------------------------------------------------------------------------------------------------------------------------------------------------------------------------------------------------------------------------------------------------------------------------------------------------------|
| <b>Quality of content:</b> comprehension and relevance                                           | - What do you think the message being conveyed in the materials is about?<br>- How do you think the information presented would aid your decision-making regarding antibiotic therapy?<br>- How is the information relevant to your practice in administrating IV antibiotics to children?                                    | -What do you think the message in this information sheet is trying to tell you?<br>- Would this information help you to understand or make a decision regarding your child’s switch from IV to oral antibiotics?                                                                                                                                                                         |
| <b>Effectiveness of design:</b> style, layout, use of visual cues (arrows, boxes, bold headings) | - How effective is the overall design of the materials?<br>- any comments regarding the style, layout or use of visual cues in the materials (such as boxes, arrows, headings)?                                                                                                                                               | - What are your thoughts about the appearance of the information sheet?<br>-any feedback about the style, layout and use of pictures in the sheet?                                                                                                                                                                                                                                       |
| <b>Useability:</b> perceptions of usefulness in daily practice                                   | - Would you use the materials in your daily practice? And why or why not?<br>- Are there materials that you would prefer to use over others? Can you tell me which ones and why?<br>- Do you think members of your healthcare team (i.e. nurses, doctors, pharmacists) would use the materials? Who in particular and why so? | - How would this information sheet be useful to you?<br>- Would you normally take the time to read through information like this? Why so?<br>- Would your attention to this sheet be different when your child is ill? How so?<br>- How would you like this information sheet to be given to you? (i.e. explained in-person by your healthcare worker, given time to read alone) Why so? |
| <b>Further comments:</b>                                                                         | - Do you have any further comments you would like to share about the materials we have discussed?                                                                                                                                                                                                                             | - Do you have any further comments you would like to share about the information sheet?                                                                                                                                                                                                                                                                                                  |

\*Questions adapted from the following sources:

- The Patient Education Materials Assessment Tool (PEMAT) and User’s Guide An Instrument To Assess the Understandability and Actionability of Print and Audiovisual Education Materials (Version 1.0), 2014.
- Farrell-Miller, P. and Gentry, P. 1989. How effective are your patient education materials? Guidelines for developing and evaluating written education materials. *Diabetes Educator*, vol 15, no. 5, pp. 418-422.



## IV to oral conversion study: PHASE 4 post-intervention

### BACKGROUND

Firstly, I just want to get an idea of your role and which hospital you're working at. So could you briefly tell me the hospital where you used the materials, your position there and your length of employment?— i.e., (junior?) doctor, nurse, pharmacist, etc- are they a consultant?

### PART A Comprehension and relevance

1. Thinking about the materials you used and had access to, do you think the information presented aided your decision-making regarding antibiotic therapy?
  - a. Did you think the message and relevance was conveyed clearly in the materials?
  - b. Which formats did you find most useful and why/why not?
2. Did you find the patient/carer leaflet or video helpful in providing information to patients and their families?
  - a. Why/why not?
3. Were there any difficulties in reading comprehension or barriers to using the leaflet or the educational video?
  - a. How could it be improved?

### PART B Design: style, layout, use of visual cues (arrows, boxes, bold headings)

4. Do you remember where your interventions such as poster, flow chart and guidelines were located (i.e., on the ward and or via intranet) if you needed to refer to them?
  - a. Poster on the wall – was it easy to see among all other wall posters; Poster/flow chart/guidelines in medication chart easy to see?; and yellow stickers displayed in the medication chart?
5. Was the overall design of the materials effective in assisting with decision making?
  - a. any comments regarding the style, layout or use of visual cues in the materials (such as boxes, arrows, headings)?

### PART C Daily practice

6. How often did you use the materials in your daily practice? And why or why not?
7. Has using these materials changed your practice?
8. Were there any changes in prompts to assess antibiotic therapy from other healthcare team members since using this intervention?
  - a. How did they change? Type of prompt, frequency etc.

### PART D Support

9. Was there enough support provided to implement the program?
  - a. What was helpful/unhelpful
10. Is there anything you would want/need to keep using these materials in future?
11. Do you have any suggestions to improve future uptake or scalability of the program?

### PART E Further comments

12. Finally, do you have any further comments you would like to share about the materials we have discussed?

## Phase 2: Pre-intervention evaluation of healthcare worker and patient-guardian materials

Part 1 of this document presents the views of healthcare workers, Part 2 presents the views of parent/guardians, and Part 3 presents the views of Indigenous Liaison Officers.

### Materials

The intervention materials under review included different flow charts regarding antibiotic conversion eligibility and identification of suitable oral antibiotics, fact sheets, chart labels, and patient-guardian material.

**Table 1.2 Proposed intervention materials**

| Material                                  | Description                                                                                                                |
|-------------------------------------------|----------------------------------------------------------------------------------------------------------------------------|
| <i>?STOP chart</i>                        | A simple IV to oral guide to aid in practitioner's decision-making.                                                        |
| <i>Flowchart</i>                          | Detailed chart for identifying those eligible for IV to oral antibiotic conversion                                         |
| <i>Medication tables</i>                  | One table included suitable medications and dosages, and another included comparable IV to oral antibiotics for switching. |
| <i>Patient chart labels/stickers</i>      | Reminders to prompt a medication review.                                                                                   |
| <i>Fact Sheet</i>                         | A general IV to oral conversion fact sheet for healthcare workers.                                                         |
| <i>Patient-guardian information sheet</i> | Information for patient-guardians regarding switching from IV to oral antibiotic medication.                               |

## Part 1: Considerations for tailoring healthcare worker materials

In this section, we present views from the 15 healthcare workers views and recommendations regarding the materials designed for healthcare workers. Specifically, healthcare workers were asked to review the content and design of the intervention materials, and consider their relevance and utility within their personal practice and that of their colleagues.

### Overall impressions of the intervention and anticipated uptake among healthcare team members

The intervention materials received strong endorsement from participants, who acknowledged the importance of the issue being addressed, along with the appropriateness of the materials. Several participants also shared their anticipation for its implementation.

*"I'm wholly on board with it and yeah it looks like great material so far..." (HCW05 paediatric pharmacist)*

*"I mean from point of view that I've actually been part of the judicious use of antibiotics at [the] Hospital and I'm pleased to see that we are heading in the right direction. And I would entirely endorse the recommendations and selection of antibiotics as prescribed in this protocol." (HCW07 Paediatric director)*

*"I'm looking forward to being able to use it I think it's good..." (HCW12 paediatric consultant)*

A few participants also noted the relevance of the intervention for regional hospitals, where access to specialists tends to be limited and staff turnover higher.

*"Definitely a big help...in a regional centre where they are the only doctors, this can really impact on how they would practice" (HCW02 paediatric registrar)*

*"...we have a lot of locum doctors. And it is good to have an in your face recommendation of what the expectation of medication is [locally]...rather than to come along with their practices elsewhere" (HCW07 paediatric director)*

While participants indicated the relevance of the materials for all healthcare team members, there was strong agreement that the greatest uptake could be anticipated among nurses and pharmacists, followed by junior doctors. For nurses, it was felt that the materials would clarify the IV to oral conversion process and support them in appealing for timely clinical reviews of IV antibiotic use. Pharmacists were considered most likely to use the materials to aid in decision-making and help foster shared understandings about best practices in antimicrobial stewardship. Similarly, it was felt that junior doctors would use the materials to support decision-making and communication with team members. Most participants felt that senior practitioners, in particular doctors, would have minimal engagement with the materials, due to their already established practices. However, some senior doctors highlighted the importance of the materials for formalising their practice and serving as prompts for reminding them to undertake timely medication reviews.

### Personal preferences and recommendations for optimising the content and design

Participants relayed clear and consistent understandings of the underlying message being portrayed through the intervention materials. While general satisfaction with the materials was evident, most indicated personal preferences for specific materials. When asked to consider the content and design of each material, some diverse views were shared regarding their effectiveness, as well as important, although at times conflicting, recommendations for improving their utility.

### *Flow chart and table of suitable antibiotic agents (flow chart)*

The flow chart was particularly favoured by junior doctors and pharmacists, who highlighted its utility for aiding their decision-making, particularly around the selection of appropriate oral antibiotics.

*"[the flow chart is] probably the main thing that I would prefer and would be using because that's the most helpful for me. Like I want to go to a doctor with a recommendation I don't want to say look we just need to change it without giving them [a recommendation]." (HCW05 paediatric pharmacist)*

*"...definitely a big help. Because sometimes when we are in doubt there is no... direct guideline... this can really impact on how [we] would practice... it's going to be quite a good resource for we healthcare providers." (HCW02 paediatric registrar)*

*"...it helps me to decide whether or not I have to put in another IV cannula if a cannula tissue is in a kid... it shows you whether or not oral is possible." (HCW04 paediatric intern)*

One pharmacist also shared how using the material would affirm confidence in their decision-making process, while a senior paediatrician shared how it formalised the approach they already practiced.

*"...oral antibiotics might be good but without having something to go with it I'm not as confident in my decision. And especially when I you know I'm not diagnosing and I'm not at the bedside on ward rounds. I think the flowchart would definitely make me more confident in saying "Hey let's look at this"." (HCW08 pharmacist)*

*"I'm not sure that we weren't doing it in the past, [the flow chart] just formalises the process into the four or five steps." (HCW13 paediatrician)*

### **Content considerations**

Overall, participants noted that the flow chart and table for suitable antibiotic agents was the most informative of the materials presented. Several also praised it for its clearness and ease to follow.

*"I felt like this flow chart is really good... and more like informative." (HCW03 paediatric nurse)*

*"So I felt like this flow chart is really good because it has got all [of the] exclusion criteria and everything and in this one so...I felt like this one is this is better [than the ?STOP guideline]." (HCW03 paediatric nurse)*

*"Yeah so as a pharmacist I think having these really clear guidelines... is something that I could definitely use." (HCW08 pharmacist)*

Few issues and recommendations for improving the content of the flow chart were shared. One pharmacist felt that the table of suitable antibiotic agents could be described more simplistically, and cautioned against complicating decisions with too many oral antibiotic options.

*"...this [suitable agents table] may be a little bit wordy... and then it's got... quite a few [to choose from]... too many options is sometimes difficult for some people... we could look at minimising some of them..." (HCW05 paediatric pharmacist)*

Another pharmacist saw the need for more information to be provided in the exclusion criteria.

*"...with all of these exclusion conditions [are] there other things that we call any of these conditions... what else could we be looking for?" (HCW08 pharmacist)*

Pharmacist HCW08 also felt that the suitable agent chart did not adequately address important barriers to oral antibiotics in paediatrics, such as tablet or liquid dosing and taste.

*"...like clindamycin it doesn't come in a liquid, it's only a 150 milligram capsule. [So you need to know] what dose you'd go for and is it practical and is it easy for the parents to give?"*

1  
2  
3 *Because that could be another thing that makes oral not work... [you may] not realise you*  
4 *can't measure it or there's a foul taste or something like that." (HCW08 pharmacist)*  
5

### 6 Design considerations

7 Little criticism was received regarding the design of the flow chart. In line with remarks about its  
8 content, participants noted its ease and simplicity to follow:

9 *"I think the back flowchart is also good because it has bigger arrows and you can just follow it*  
10 *through." (HCW10 paediatric nurse)*  
11

12 *"I find that some of the flow charts that I've seen to date have really complex.... So I like that*  
13 *this is quite short and sweet and concise... Like as the pharmacist, if I were to go and broach a*  
14 *doctor and say "Look I think that we need to switch" it's not too much [to talk through]..."*  
15 *(HCW05 paediatric pharmacist)*  
16  
17

18 While one participant felt the use of colours in the flow chart was appropriate, another felt they were  
19 ineffective:

20 *"But you know you've got your green, the colour... obviously matches up with if they do meet*  
21 *those conditions... Overall presentation I think is quite good." (HCW05 paediatric pharmacist)*  
22

23 *"I guess the colours don't really stand out on the flowchart to me... [unlike] I guess with the*  
24 *other ones when you've got red for stop.... I just don't know about the yellow for the no?"*  
25 *(HCW08 pharmacist)*  
26  
27

28 Finally, one recommendation was made for improving the readability of the boxes in the flow chart:

29 *"The flow chart the only issue that I had with it... [concerned] the box that says are signs and*  
30 *symptoms improving? And if available are sepsis markers decreasing? Which then has a note*  
31 *that would describe bone infections and CRP rises and falls. I think that this box in particular is*  
32 *both asking... two questions and perhaps that could be separated." (HCW01 paediatric*  
33 *resident)*  
34  
35

### 36 Recommended location for encouraging uptake

- 37 • Pharmacist and acting director (HCW14) advised targeting doctors and pharmacists by placing  
38 the material in their personal work spaces, i.e. attached to pharmacist files and doctor's carts.  
39

### 40 ?STOP guideline chart and lanyards

41 Participants typically discussed the ?STOP guideline chart and lanyards together. Nearly all  
42 participants, representing different modalities and levels of seniority, felt that the guideline chart had  
43 the greatest utility of the intervention materials. Most prominently, it was agreed that the guideline  
44 could serve as a prompt: to remind practitioners to review IV antibiotic use and encourage timely  
45 decision-making, to clarify the decision-making process, and to support shared understandings and  
46 clearer communication between healthcare team members.  
47

48 *"I think it's a good prompt and it certainly is something that as a nurse I can prompt a doctor*  
49 *about." (HCW11 paediatric nurse)*  
50

51 *"I'm not sure that I would necessarily refer to them every time I wanted to consider changing*  
52 *to orals... I think the steps that need to be taken are fairly straightforward. But it's useful to*  
53 *have a reminder... To do it within the right time limit yeah." (HCW13 paediatrician)*  
54  
55

56 *"And I think it might help also to show to the nurses and the parents who are usually the*  
57 *strongest advocates for the kids saying do you have to put in another IV cannula. And I can*  
58 *show them this and say according to this guideline I think we have to put in another IV*  
59  
60

1  
2  
3 *cannula and I think everyone will be happier if there's a clear guidelines." (HCW04 paediatric*  
4 *intern)*  
5

6 The guideline was valued by junior doctors for providing direction on the best course of action to  
7 make and by nurses for informing them about the treatment being administered.

8 *"It basically helps me, it helps me to decide whether or not I have to put in another IV cannula*  
9 *if a cannula tissue is in a kid. Obviously we're really reluctant we would much rather give oral*  
10 *but it shows you whether or not oral is possible." (HCW04 paediatric intern)*  
11  
12

13 *"...I see it useful because it's one making us aware of what we are actually doing with the*  
14 *medication... how long we're giving it for and things like that... clearly it says stop and think*  
15 *about what we're doing." (HCW10 paediatric nurse)*  
16

17 Participants shared mixed views concerning the utility of the guideline lanyards, with some strongly  
18 endorsing their use while others dismissing them as ineffective.

19 *"I would see myself using that algorithm sheet a lot. And the lanyard." (HCW06 paediatric*  
20 *intern)*  
21

22 *"I'd probably use the guidelines but I don't know we just have so many lanyards... So I*  
23 *probably wouldn't use the lanyard" (HCW08 pharmacist)*  
24  
25

## 26 Content considerations

27 While the ?STOP chart was the most favoured material of the intervention, it received the most  
28 constructive feedback, with some participants suggesting it was limited as a decision-making  
29 resource. A few participants criticised its reliance on consulting external sources and its lack of  
30 concrete advice regarding appropriate oral antibiotic options. Furthermore, some participants felt  
31 that consulting infectious diseases (ID) services could risk delays in making the switch as they  
32 perceived the service as being ill-equipped to handle the volume of questions it would receive.

33 *"It's short and simple which is good for like a quick review." (HCW02 paediatric resident)*  
34

35 *"I think it definitely makes you think about the decision. However, I don't think it contains*  
36 *everything that it needs for a decision to be made and I would worry that it would just be*  
37 *another thing that we'd look at but not give action on it... There's a lot about consulting ID*  
38 *micro so whether that would happen in an efficient manner? And we don't really have any sort*  
39 *of recommendations on what antibiotics." (HCW08 Pharmacist)*  
40  
41

42 *"...if I was working more rurally I'd talk to my senior person, senior medical officer... than a*  
43 *consulting service like infectious disease... I don't think the region is equipped to deal with the*  
44 *amount of IV antibiotics use and therefore questions." (HCW01 paediatric resident)*  
45  
46

47 Pharmacist HCW08 felt that the guideline was lacking critical information about how to navigate the  
48 timing of doses when making a switch.

49 *"So when we say moving to oral like when are we moving to oral?... Are we going to start that*  
50 *straight away or are we going to wait till the next day? So I think that's important... I'm not*  
51 *saying it needs to be on that form... you want that to be... succinct. But I think there has to be*  
52 *something that goes with that that would give recommendations of what you would change*  
53 *to if you can't get in contact with someone else. So kind of similar to the paediatric sepsis*  
54 *pathway that there's lots of recommendations on what you'd actually choose." (HCW08*  
55 *Pharmacist)*  
56  
57

58 Participants HCW11 and HCW13 also advised that the title of the guide be changed to more directly  
59 reflect who it was intended for at a glance, stating that it is misleading in its current form.  
60



1  
2  
3  
4  
5  
6  
7  
8  
9  
10  
11  
12  
13  
14  
15  
16  
17  
18  
19  
20  
21  
22  
23  
24  
25  
26  
27  
28  
29  
30  
31  
32  
33  
34  
35  
36  
37  
38  
39  
40  
41  
42  
43  
44  
45  
46  
47  
48  
49  
50  
51  
52  
53  
54  
55  
56  
57  
58  
59  
60

*"I probably wouldn't call it that, guidelines in general I'd probably call that. Because my first thing when I first glanced at it I thought this was something I was giving to the patients."*  
(HCW11 paediatric nurse)

Furthermore, one participant raised a concern that the material does not address common barriers for taking antibiotics orally among paediatrics:

*"[However, it does not consider the issue that]... some patients like in kids... sometimes they don't like to take medicine. So in that case sometimes we normally put a gastric tube and discharge them home... Because sometimes people [have a] hard [time] to get that medicine down."* (HCW03 paediatric nurse)

### Design considerations

Most participants shared positive views about the design of the guideline, in particular noting the appropriateness of the bright colours used and effectiveness of the ?STOP acronym and sign.

*"I think the poster with the stop is probably going to be the best, much as I hate acronyms... Because it's bright, it's easy to read and it isn't overloaded with information."* (HCW07 paediatric director)

*"...the stop [acronym] is very, it's catchy. I think you know pneumatic[s] are a very good way to help people go through a system..."* (HCW12 paediatric consultant)

*"...to me [it] looks great. You know it's easy to follow... And then the lanyard version of that which is pretty much the same thing just in a small thing... when you can't find the big version it would be great."* (HCW09 paediatric nurse)

One pharmacist, however, raised concern about the ?STOP acronym having to contend with numerous other acronyms in the hospital environment:

*"...there's lots of acronyms that float around the hospital it's the odd thing. So whether or not it really stands out from the crowd, because there is... a lot of material out there."* (HCW14 pharmacist)

In contrast to praise received for this material, one paediatric resident found the material's layout difficult to read, and highlighted a malalignment between boxes one and two and the questions they relate to:

*"It's spread into 3 different columns and the overall readability of it is poor. So the way it kind of looks is that it should be read downwards... [Also] Box 1... doesn't relate to the first question, it relates to the second question which I think decreases the readability of it. Which is similar to Box 2 is... not as related as it could be."* (HCW01 paediatric resident)

Furthermore, paediatric resident HCW01 and intern HCW04 raised different issues concerning the use of colour in the material: one recommending traffic light colours to help navigate the chart, while the other cautioned against the use of red.

*"I would anticipate you would be going for like a traffic light system like a green, orange and red. So they're kind of meant to be like an amber light but from the first kind of glance it's not as easy as the flow chart could be to read."* (HCW01 paediatric resident)

*"Again I don't like red, red means bad, it means dying, it means CPR I don't think we're talking about that at this stage... So blue is good, maybe purple or brown or orange some neutral kind of colour that doesn't scare people yeah."* (HCW04 paediatric intern)

Finally, one participant raised specific concern with the readability of boxes one to three on the lanyard due to its fine print.

### Recommended locations

- Place copies of the guideline in the medication section of a patients' chart (HCW04 paediatric intern, HCW11 paediatric nurse).
- Prioritise targeting nurses by posting in areas where nurses would see them most, i.e. near medications (HCW10 paediatric nurse, HCW11 paediatric nurse, HCW14 pharmacist)
- Distribute lanyards to all paediatric staff (HCW14 pharmacist)

### Patient chart labels

Second to the ?STOP guidelines, participants viewed the patient chart labels as an important component of the intervention, with nurses and pharmacists in particular anticipating their regular use of the material. Participants valued the labels as a prompt for encouraging timely reviews of clinical decisions, supporting clearer lines of communication between healthcare team members and encouraging team decision-making.

*"If you forget it we can just put a small sticker in front of the medication chart to remind the doctor so they can have a look... So that's a good thing we are letting the doctors know as well rather than waiting for the pharmacist or like the doctor." (HCW03 paediatric nurse)*

*"I think it would nudge you to consider it more frequently... formally make you think about it whereas I think most of us think about it informally and possibly not necessarily at forty eight hours but maybe even a bit later than that." (HCW13 paediatrician)*

*"...I think it actually it encourages... a little bit more of a team approach when it comes to drugs... the nurses and the pharmacists could put these stickers on... and bring it to the doctor's attention and say "Actually do we really need to continue IV"?... it will encourage a team approach having these different resources rather than it being just written [on a guideline]." (HCW12 paediatric consultant)*

Despite participant enthusiasm for the chart labels, electronic patient records were noted as a potential barrier for their uptake.

*"Probably we won't be able to use this [chart labels] if it's on IEMR [integrated electronic medical record]" (HCW02 paediatric resident)*

### Design considerations

Overall participants shared highly positive views regarding the design of the patient chart labels, describing them as visually appealing and eye catching.

*"And I really the IV antibiotics labels I think are excellent and should be implemented as is in my opinion." (HCW01 paediatric resident)*

*"Having a sticker like that conveys the message quite easily. That's why I like the sticker... I like the design of it personally... it's a very big eye catching sticker. And like I don't think prescribers could really miss something like that when they open the chart." (HCW14 pharmacist)*

Some participants noted the appropriateness of the colours used in the stickers for carrying their intended message, while one participant felt that the black writing on the red sticker lacked visibility.

*"And then on the labels page I think they're good colours. I mean the red one obviously saying stop I think that's an appropriate colour. And the yellow one it catches your attention. So if you see it in the chart or wherever your eyes will easily pick it up and it will stop you doing that." (HCW10 paediatric nurse)*



1  
2  
3 *"...I like that that stands out the red one. And I'm not sure whether it's just the way it's on the*  
4 *form or not but I don't know how clear often black on red is not very clear." (HCW11*  
5 *paediatric nurse)*

#### 7 Recommended location

- 8 • Patient medical charts were the agreed location for the labels among participants.

#### 10 *Fact sheet*

11 While the fact sheet for practitioners drew little consideration from most participants, both in regards  
12 to its content and design, its relevance for informing practice was particularly noted by those  
13 participants whose work included education and/or leadership elements (in particular: HCW09  
14 paediatric nurse, HCW08 pharmacist, and HCW14 pharmacist). These participants valued the sheet's  
15 utility as an educational resource for informing students and interns of best practice.

16 *"The factsheet would be helpful... for like pharmacy students and interns... it wouldn't be*  
17 *something that you'd use all the time it would be more as a teaching tool." (HCW08*  
18 *pharmacist)*

19 *"Again like as in do I see the relevance of that? Of course... because often people don't*  
20 *consider the hidden costs associated with... IV therapy. They often see it as like... a more*  
21 *comprehensive treatment for an infection when it's really not necessary." (HCW14*  
22 *pharmacist)*

23 *"The fact sheet I think would be good for education purposes... when you're trying to introduce*  
24 *something new to staff..." (HCW09 paediatric nurse)*

25 One participant advised that the utility of the sheet would be increased if it were available in  
26 electronic format with reference links to support easy further reading around the topic.

#### 28 *Recommended location:*

- 29 • Locate strategically in ward to encourage staff and student education (HCW03 paediatric  
30 nurse; HCW14 pharmacist)
- 31 •

### 40 SUMMARY: RECOMMENDATIONS FOR HEALTHCARE WORKER MATERIALS

| 42                                                                        | 43                                                                                                                                                                                                                                                                                                                                                                                                                                                                                                                       | 44                                                                                                                                                                                                                                                                                                         |
|---------------------------------------------------------------------------|--------------------------------------------------------------------------------------------------------------------------------------------------------------------------------------------------------------------------------------------------------------------------------------------------------------------------------------------------------------------------------------------------------------------------------------------------------------------------------------------------------------------------|------------------------------------------------------------------------------------------------------------------------------------------------------------------------------------------------------------------------------------------------------------------------------------------------------------|
|                                                                           | CONTENT                                                                                                                                                                                                                                                                                                                                                                                                                                                                                                                  | DESIGN                                                                                                                                                                                                                                                                                                     |
| 45 <b>Flow chart and table of suitable antibiotic agents (flow chart)</b> | <ul style="list-style-type: none"> <li>46 • Simplify the content in the table of suitable antibiotic agents: describe the content in fewer words and consider reducing the amount of antibiotic options listed.</li> <li>47 • Provide more information in the exclusion criteria: are there alternative names for the conditions listed and/or others to consider?</li> <li>48 • Indicate the appropriateness of each oral antibiotic for paediatrics: tablet or liquid dosing, and appropriateness of taste.</li> </ul> | <ul style="list-style-type: none"> <li>49 • Change the use of yellow in the flow chart (for the 'no' boxes) to a colour that has greater impact/stands out more.</li> <li>50 • Split the content of the box that describes 'signs and symptoms for improving' in the flow chart into two boxes.</li> </ul> |

|                                                  |                                                                                                                                                                                                                                                                                                                                                                                                                                                                                                                                                                                                               |                                                                                                                                                                                                                                                                                                                                                                                                                                                                                                                                                        |
|--------------------------------------------------|---------------------------------------------------------------------------------------------------------------------------------------------------------------------------------------------------------------------------------------------------------------------------------------------------------------------------------------------------------------------------------------------------------------------------------------------------------------------------------------------------------------------------------------------------------------------------------------------------------------|--------------------------------------------------------------------------------------------------------------------------------------------------------------------------------------------------------------------------------------------------------------------------------------------------------------------------------------------------------------------------------------------------------------------------------------------------------------------------------------------------------------------------------------------------------|
| <p><b>?STOP guideline chart and lanyards</b></p> | <ul style="list-style-type: none"> <li>• Consider ways of reducing reliance on consulting infectious diseases to aid in healthcare worker's decision-making.</li> <li>• Indicate appropriate oral antibiotic agents for making the switch, along with how to navigate the timing of oral doses in supplementary information to the guideline.</li> <li>• Change the title of the guideline to more directly reflect who it is intended for (the user).</li> <li>• Address common barriers for taking antibiotics orally among paediatrics (tablet or liquid dosing, and appropriateness of taste).</li> </ul> | <ul style="list-style-type: none"> <li>• Improve the readability of the chart by creating a clearer alignment between the key questions asked and their corresponding information boxes (1 and 2).</li> <li>• While several participants indicated their satisfaction with the colours used, two recommended either: avoiding the 'alarming' use of red, or utilising a traffic light system of colouring (red, amber, green).</li> <li>• Consider ways to improve the readability of the small print in boxes one to three on the lanyard.</li> </ul> |
| <p><b>Patient chart labels</b></p>               |                                                                                                                                                                                                                                                                                                                                                                                                                                                                                                                                                                                                               | <ul style="list-style-type: none"> <li>• Consider ways to improve the readability of the black text on the red chart label.</li> </ul>                                                                                                                                                                                                                                                                                                                                                                                                                 |
| <p><b>Fact sheet</b></p>                         |                                                                                                                                                                                                                                                                                                                                                                                                                                                                                                                                                                                                               | <ul style="list-style-type: none"> <li>• Provide an electronic version of the sheet with reference links.</li> </ul>                                                                                                                                                                                                                                                                                                                                                                                                                                   |

### Potential barriers for uptake

Several potential barriers to the uptake of the intervention materials were identified by participants. First, it was suggested that the authority of the intervention materials could be undermined unless they are officially endorsed as practice protocol:

*"There may be on the occasion some practitioners who may have their own ideas and won't follow a guideline or a poster unless it's actually like an official, that's what we're going to do guideline. As opposed to suggestive guideline." (HCW11 paediatric nurse)*

Second, and as previously noted, paediatric nurses HCW03 and HCW08 indicated that one challenge to realising successful outcomes for the intervention will be ensuring oral antibiotics are taken correctly at home, noting issues with taste, swallowing tablets, and/or a patient-guardian's misunderstanding or lack of attention of dosing requirements.

Third, as noted previously in regards to the ?STOP guideline, some participants felt that the guideline's advice to contact an Infectious Diseases (ID) consultant to aid in decision-making risked delaying important decisions, and therefore, undermining efforts to achieve timely IV to oral antibiotic conversion. This concern was seen to be compounded by the challenge of regional hospitals not having paediatric infectious disease teams to fall back on.

*"my biggest concerns with it would be the fact that we are a regional hospital. And we don't have paediatric infectious disease team... So there can be a lag time with that which I think could potentially slow up the whole process. And just the guidance, so if you don't have access to ID or ID aren't going to get back to you until the afternoon what are you going to do before*

1  
2  
3 *then? ...a lot of it does rely on infectious diseases and without having that person in our*  
4 *hospital [it] could be an issue.” (HCW08 pharmacist)*  
5

6 Finally, pharmacist HCW08 raised concern about the short-term nature of the intervention in relation  
7 to the long-term efforts usually required to ensure sustainable behavioural change in medical  
8 practice.  
9

10 *“...we’re a teaching hospital... we always have new doctors coming. So I guess when this study*  
11 *is going it will be intensive, everyone will know about it. But in a year’s time when it’s not*  
12 *going anymore if we’ve just got this to refer to I think it could fall over yeah.” (HCW08*  
13 *pharmacist)*  
14

#### 15 16 **SUMMARY: POTENTIAL BARRIERS FOR HEALTHCARE WORKER MATERIALS**

- 17 • The authority of the intervention materials could be undermined if they are suggested  
18 guidelines, as opposed to endorsed practice protocol.
- 19 • Outcomes of the intervention could be thwarted by common challenges in ensuring oral  
20 antibiotics are taken correctly at home.
- 21 • Relying on contacting an infectious diseases consultant to aid in decision-making could risk  
22 delaying efforts to achieve timely IV to oral conversion.
- 23 • The short-term nature of the intervention may be limited in its capacity to foster sustainable  
24 behavioural changes among healthcare workers.
- 25
- 26
- 27
- 28
- 29

#### 30 31 **Part 1 Summary**

32 Overall, the intervention materials received positive endorsements from participants, who indicated  
33 their relevance and utility with only minor structural changes recommended. There are, however,  
34 further suggestions for optimising its uptake that can be drawn from the findings. Considering  
35 participants diverse material preferences, it is advantageous to encourage study sites to tailor the  
36 intervention to local needs by selecting those materials they find most appealing, rather than offering  
37 a standardised package for all locations. Anticipating potential barriers to the intervention’s uptake,  
38 as noted by participants, offers further opportunities for supporting the intervention. Among these,  
39 ensuring the intervention receives strong endorsement and promotion from study sites, having  
40 strategies to address paediatric specific challenges to taking oral antibiotics, and identifying further  
41 avenues to aid practitioner decision-making will be important. Finally, considering strategies that  
42 support sustainable behavioural change will be important, especially given the short-term nature of  
43 the intervention and the reality of high staff turn-over in regional and rural hospitals.  
44  
45  
46  
47  
48  
49  
50  
51  
52  
53  
54  
55  
56  
57  
58  
59  
60

## Part 2: Considerations for tailoring an information sheet to best meet the needs of patient-guardians

In this section, we present healthcare worker and patient-guardian views and recommendations for the tailoring of the information sheet: *'Making the switch: Changing from intravenous to oral antibiotics. Information for parents and carers'* (see Appendix A). Specifically, participants were asked to reflect upon the ways in which the sheet's content and design could be best tailored to meet the needs of patient-guardians. Additionally, healthcare workers were asked to consider the material's relevance and utility within their personal practice and that of their colleagues, and patient-guardians were asked to reflect upon the sheets' relevance for informing them of their child's treatment, along with their likely engagement with it.

Fifteen healthcare workers situated in the paediatric departments of the two study sites consented to being interviewed, as well as eight patient-guardians at those sites whose children were receiving IV antibiotic therapy for an infection. In what follows, we provide an overview of healthcare worker and patient-guardian's general impressions of the material, followed by their personal preferences and recommendations for optimising the content and design of the information sheet. Next, the utility of the sheet is considered from both healthcare worker and patient-guardian perspectives. Finally, potential barriers identified by participants for the uptake of the information sheet are presented.

### Overall impressions of the information sheet

In general, healthcare workers and patient-guardians shared positive views about the information sheet, noting its usefulness and appropriateness for informing parents and carers.

*"I think the information for parents was well written and suitable guidelines for parents."*  
(HCW01 paediatric resident)

*"[It is] certainly a useful piece of information to give to parents if they're wanting more information about antibiotics and... why we need to consider going onto an oral form of antibiotics..."* (HCW11 paediatric nurse)

*"I thought it was fine, um, it was very easy to read and well written... I thought it was a good information sheet"* (PG04).

*"No, I actually, it's one of the better ones that I have read actually, um, so I mean there's nothing there that I can think that youse didn't cover..."* (PG05)

### Personal preferences and recommendations for optimising the content and design

#### Content

##### Healthcare workers

While few healthcare workers commented on the information sheet, most who did expressed their satisfaction with the sheet's content, noting its appropriateness for informing patient-guardians about treatment options, in what was described as an often overwhelming environment. Adding to this, one healthcare worker felt the sheet was an important educational resource for patient-guardians, dispelling misconceptions about IV versus oral antibiotic use.

*"The information sheet for the parents, Making the Switch is fabulous actually... And it does give you... [information about the] side effects and all... it's really cool."* (HCW09 paediatric nurse)

*"Making the Switch I think that's really handy for parents because hospitals can just be information overload and once people have something tangible or something they can take with them they can soak it up in their own time and read through it."* (HCW10 paediatric nurse)

1  
2  
3 *"There is a certain stigma in hospital especially like some parents believe that the IV therapy will*  
4 *be more effective than oral therapy. That's not always the case and this is a great fact sheet to*  
5 *help dispel that..." (HCW14 pharmacist)*  
6

7  
8 Importantly, one healthcare worker highlighted the importance of the sheet for empowering patient-  
9 guardians to make informed decisions about their child's care.

10 *"...it [is] empowering the patients and... Well in this case the carers take control of the child's*  
11 *care... (HCW14 pharmacist)*  
12

13 While most healthcare workers felt the volume of information presented in the sheet was appropriate,  
14 one suggested it was lengthy for patient-guardians. To address this concern, they recommended  
15 providing a quick summary of the sheet's main messages for those guardians who may feel  
16 overwhelmed by the volume of information presented.

17  
18 *"With the one for the parents I can see the message that it's giving the parents but I do think*  
19 *it's a lot of information to take on... they need that much information but they also need just a*  
20 *quick area that they can get the main points out of it." (HCW08 paediatric pharmacist)*  
21

22 Furthermore, one pharmacist (HCW14) felt the language used is inappropriate for those patient-  
23 guardians with low literacy levels. They recommended the sheet be reduced to one page with simplified  
24 language to accommodate such needs.

25  
26 *"Out here obviously we've got issues with like literacy and healthcare literacy... which I could*  
27 *see something like this not being utilised as much as like in a metropolitan area... not to dumb*  
28 *it down too much but I think it could be simplified for [rural] residents here just to use a bit*  
29 *more... simplistic language. You know shorten it up to one page... I think would be highly*  
30 *beneficial... [For example] just things like you know probiotics for some children probiotics may*  
31 *help restore... good gut bacteria... oftentimes we simplify that down into like you know there's*  
32 *normally good bugs in like in our tummies, like literally to that level. Which can be quite helpful*  
33 *and I think for out here like might be beneficial." (HCW14 pharmacist)*  
34  
35

### 36 Patient-guardians

37 Nearly all patient-guardians shared their satisfaction with the content of the information sheet,  
38 emphasising its relevance for informing them about their child's treatment options, with one patient-  
39 guardian also describing the 'peace of mind' and 'reassurance' that such information can provide.

40  
41 *"I think it's good to have it all kind of laid out... a lot of people wouldn't really understand a lot*  
42 *about antibiotics and IV and oral... like you kind of just do what the doctors tell you to do."*  
43 *(PG06)*  
44

45 *"So, yeah, I think that that explains it quite well, when, [you are] in that point where you're*  
46 *trying to decide. It gives you enough information as a parent to make the decision and ultimately*  
47 *everyone wants to get home from hospital." (PG08)*  
48

49 *"...it just made me understand what's going to happen and the reasons for switching to oral and*  
50 *the difference and it just was informative... [it provides] more peace of mind... And [is]*  
51 *reassuring... It's good to know what's going on, especially when it's your child." (PG04)*  
52  
53

54 Patient-guardians discussed how the clarification they gained through the information enabled them  
55 to better communicate treatment plans to their child and was empowering because it equipped them  
56 with the information to more confidently ask healthcare workers questions and participate in the  
57 decision-making concerning their child's treatment.

58 *"Yeah it does make me feel... alright and [to know] how to communicate with my son at home*  
59 *[about his treatment]." (PG07)*  
60

1  
2  
3 *"...it actually gives you the idea of what to look for... sometimes you do feel sort of out of place*  
4 *if you were to ask questions [feeling] well we didn't go to medical school, we don't know, so you*  
5 *shouldn't, you shouldn't challenge. Some days you just don't, whereas if you had that*  
6 *information like that, you know where you are, so you know that you don't a) sound stupid, or*  
7 *b) sound forceful."* (PG08)  
8  
9

10 Most patient-guardians indicated that the use of language in the sheet was at an appropriate level to  
11 enable comprehension. One patient-guardian, however, briefly touched upon their difficulty reading  
12 and understanding parts of the sheet, illuminating the diversity of patient-guardian's literacy levels.

13 *"...it has a lot of, like important information and it seems, it's written in a way that a parent can*  
14 *understand."* (PG06)

15  
16 *"it's not so simple that you feel like an idiot for reading it, but there's no terminology in there*  
17 *that I think that people, like my husband, ex-husband, would have any problems*  
18 *understanding."* (PG05)  
19

20  
21 *"Some things I couldn't read like I couldn't understand."* (PG07)  
22

23 Two patient-guardians highlighted the side-effects section of the sheet to be lacking clarity; not  
24 providing enough details concerning the side effect of vomiting, and not presenting this information in  
25 a user-friendly format.

26 *"The only part that's confusing is the vomiting. It says you give an IV antibiotic for vomiting and*  
27 *then allergic reaction might be vomiting..."* (PG02)  
28

29 *"I thought there could be a bit more emphasis... on the side effects area. Because you know if*  
30 *your child did have a reaction... you would be looking through this to figure out which one, what*  
31 *type of reaction they're having and that's not very [clear], that's on the back of the sheet... if*  
32 *this had dot points or something to make it a bit more [evident because] if I was reading through*  
33 *this and in a hurry I probably would have passed over it several times... That would be a bit more*  
34 *helpful I think. Because you've got your checklist here which is great but maybe a checklist for*  
35 *the side effects of you know just a bit easier to read would be good."* (PG01)  
36  
37  
38

### 39 Design

40 While little feedback was received about the design of the information sheet, both healthcare workers  
41 and patient-guardians shared positive views, noting the effectiveness of the sheet's layout, use of  
42 colours, bullet points and checklist. Furthermore, a few participants valued the sheet for being  
43 'straightforward', 'not cluttered'.  
44

45 *"So I think it's a good design because it's, I mean it's just easy to read. And laid out you know*  
46 *there's a few, each one has a few dot points. And so they're not trying to memorise everything*  
47 *but it's fairly straightforward I think."* (HCW10 paediatric nurse)  
48

49 *"...[there is] good information there. Colours are good."* (HCW11 paediatric nurse)  
50

51 *"Um, looks pretty standard to a lot of information sheets I've seen... the picture's nice to break*  
52 *up, um, all the words... It seems to be a good amount of bullet points and short paragraphs and*  
53 *not just a lot of, you know, medical language... font size is nice."* (PG06)  
54

55 *"It's pretty straightforward, it's easy to read."* (PG02)  
56

57 *"...it's not cluttered, it's just all there and you can see it quite well."* (PG08)  
58

59 Only minor feedback was provided by one healthcare worker who felt local photos might be  
60 appropriate.



1  
2  
3 *"We could probably find our own child that we could put a photo of, does it matter?" (HCW09*  
4 *paediatric nurse)*

## 6 Useability

### 8 Healthcare workers

9 The information sheet was valued among healthcare workers as an aid for answering patient-guardian  
10 questions and communicating more effectively about a child's antibiotic treatment plan and options.  
11 The sheet was also considered important for informing patient-guardians to be on the same page with  
12 healthcare workers regarding their child's treatment. Similarly, the importance of an information sheet  
13 for backing up healthcare worker treatment decisions was stressed.

14  
15 *"And any questions that families might have. And then and knowing what to say to parents and*  
16 *families if they ask any questions... I have a lot of blank looks... And the more information I'm*  
17 *able to give them makes sense to get them more comfortable." (HCW10 paediatric nurse)*

18  
19  
20 *"Good communication tool with the parents so that we are on the same page when we are*  
21 *treating a child..." (HCW02 paediatric registrar)*

22  
23 *"And I can show them [patient-guardians] this and say according to this guideline I think we*  
24 *have to put in another IV cannula and I think everyone will be happier if there's a clear guideline.*  
25 *As opposed to "Oh the doctor is just doing it on a whim, maybe she just wants practice to stab*  
26 *a kid" which is sometimes true. No it's nicer if I've got something to back myself up." (HCW04*  
27 *paediatric intern)*

### 29 Patient-guardians

30 While most patient-guardians stated that they would read the information sheet, a range of views were  
31 shared concerning their preferences for receiving it. Half of patient-guardians valued having a  
32 healthcare worker talk them through the sheet and answer their questions, while others preferred to  
33 be handed the information to read in their own time.

34  
35 *"...it's always nice to have someone to go through and point out some of the dot points and*  
36 *then give you the chance to read it later on." (PG03)*

37  
38 *"...yeah go through and explain stuff with me at the same time [as receiving the sheet]." (PG07)*

39  
40 *"I don't like people going through things, because I sometimes feel like you have to feign interest*  
41 *or ask questions, even though you understand it, just to make them feel useful... Not to be rude,*  
42 *but yeah, I don't like that at all, I'd rather go through it at my own time and then be able to ask*  
43 *questions, if and when they come up, I guess." (PG05)*

44  
45  
46 Half of patient-guardians felt they would only read the information if it were given when their child was  
47 likely to be switched from IV to oral antibiotics.

48 *"...if he wasn't already on anything I wouldn't be looking for a sheet that says switching from IV*  
49 *to oral. So not really until he was on an IV and progressing." (PG01)*

50  
51 *"And I think that's probably where I would find it most beneficial, or obviously if she was in*  
52 *hospital on the IV and we were discussing stepping her down to orals, then before we step down,*  
53 *having this to read then." (PG05)*

54  
55 Furthermore, some patient-guardians stressed their preference for receiving the information sheet  
56 once their child was out of emergency and settled in the paediatric ward.

1  
2  
3  
4  
5  
6  
7  
8  
9  
10  
11  
12  
13  
14  
15  
16  
17  
18  
19  
20  
21  
22  
23  
24  
25  
26  
27  
28  
29  
30  
31  
32  
33  
34  
35  
36  
37  
38  
39  
40  
41  
42  
43  
44  
45  
46  
47  
48  
49  
50  
51  
52  
53  
54  
55  
56  
57  
58  
59  
60

*"But not as like I said before not when you first come in [in emergency] and they say "Oh by the way". I'd be like why are we even talking about this right now. I don't think that that's appropriate at all." (PG01)*

*"...basically when you're in Emergency... your main focus is on your child getting better... Whereas once you get up here [the paediatric ward] and they're in bed, they're asleep, and you get that time where you think, where do we go to from here? That would probably be the better time to do it." (PG08)*

Two participants stated they were unlikely to read the sheet, yet for different reasons; one had a medical background and already felt sufficiently informed, while another preferred to hear from a doctor.

*"I wouldn't because of my background [as a nurse], but I could see, for example, my ex-husband would find that very helpful, [having] no medical background and I think he would keep it." (PG05)*

*"Yeah I probably wouldn't have read it because you're mainly just relying on the doctor's opinion. Because yeah if they tell you one thing I mean I guess you trust them. And if it works that's good." (PG02)*

## SUMMARY: RECOMMENDATIONS FROM HEALTHCARE WORKERS AND PATIENT-GUARDIANS

- Content**
- Provide a quick summary of the sheet's main messages for those guardians feeling overwhelmed by the volume of information being presented.
  - Consider reducing the sheet to one page with simplified language to accommodate low literacy needs.
  - Create a dot-point breakdown of possible side-effects to help the information be identified more easily.

- Design**
- Consider using local photos.

### Potential barriers for uptake

The reality of diverse literacy levels among patient-guardians (as noted by HCW14 and indicated by PG07 earlier) presents a challenge for tailoring the information sheet. As such, the role of healthcare workers in gauging the individual needs of patient-guardians when delivering the sheet will be important for ensuring inaccessible information is adequately explained. However, if patient-guardians lack the confidence to request help, it may be difficult for healthcare workers to be responsive to their needs. As two patient-guardians reflected, not feeling comfortable to speak-up can leave them uninformed.

*"I'm comfortable asking questions because I've sort of got experience with him being sick and whatnot. But initially as a new parent, not so much. You sort of just feel like you've got to let the doctors make the choices and it's usually the afterthought when something goes wrong that... you realise you should be asking questions." (PG01)*

*"Yeah, I think maybe it's also a confidence thing in myself... so it took a little while for me to realise... if I want the proper information or information that I feel like I need... then I really need to ask." (PG06)*



**SUMMARY: BARRIERS FROM HEALTHCARE WORKERS AND PATIENT-GUARDIANS**

- Accommodating diverse literacy needs in a single information sheet presents a barrier to ensuring the information presented is accessible to all patient-guardians.
- Low patient-guardian confidence and comfortableness to ask questions can be a barrier to increasing their health literacy and may hinder healthcare worker efforts to assist in their understanding.

### Part 2 Summary

Overall, healthcare workers and patient-guardians provided positive feedback and endorsement for the information sheet, with few recommendations being made. Healthcare workers tended to value the utility of the sheet as a communication aide when discussing child treatment plans, while most patient-guardians felt it was informative and empowering for understanding and participating in their child's care. Of greatest concern, however, was the challenge of designing an information sheet that can meet the diverse literacy needs of patient-guardians. While some would benefit from simplified and condensed information, others could find this presentation condescending. In responding to patient-guardian needs, it is evident that healthcare workers will play an important role in gauging patient-guardian needs and preferences when delivering the sheet. Even so, it is possible that some patient-guardian needs will be difficult to recognise and therefore meet, due to their lack of confidence or comfortableness to speak up and ask questions.

### Part 3: Towards a culturally appropriate patient-guardian information sheet for Aboriginal and Torres Strait Islander peoples

In this section, we present Aboriginal and Torres Strait Islander healthcare workers', herein respectfully referred to as Indigenous healthcare workers, views and recommendations concerning the adaptation of the information sheet: 'Making the switch: Changing from intravenous to oral antibiotics. Information for parents and carers to meet the needs of Indigenous patient-guardians (Indigenous patient-guardians; see Appendix A for a copy of the sheet). Specifically, Indigenous healthcare workers were asked to consider the ways in which the content and design could be most appropriately adapted, along with how Indigenous patient-guardian uptake of the material could be best supported. Five Indigenous healthcare workers from two study sites consented to being interviewed. Here, we provide an overview of participant reflections on the social and cultural contexts which can shape the ways Indigenous patient-guardians engage with medical information in regional and rural Queensland. Next, Indigenous healthcare worker perspectives and recommendations for optimising the content and design of the sheet to meet the needs of Indigenous users are presented. The utility of the sheet by Indigenous patient-guardians is then considered, along with recommendations for supporting their uptake of the material. Finally, potential barriers identified by participants for the uptake of the information sheet are presented.

#### *Acknowledging the social and cultural determinants of Indigenous health*

Indigenous peoples represent a significant number of patients who are treated in rural and regional hospitals in Queensland. The cultural and social contexts of their engagement with medical information materials are critical for understanding key factors that may impact upon their uptake of such information, and critically, the ways in which materials can be adapted and shared to optimise their accessibility and appropriateness for Indigenous peoples. While Indigenous healthcare workers shared much about these contexts throughout their interviews, Aboriginal and Torres Strait Islander social and cultural determinants of health provide an important orientation for situating their perspectives and recommendations.<sup>1</sup>

#### Considering the whole picture: the cultural and social context of Indigenous patient-guardians engagement with medical information in rural and regional Queensland

Consistent throughout all interviews, Indigenous healthcare workers spoke of the contextual realities in which Indigenous patient-guardian engagement with the information sheet would occur.

*"...you know, over 50 per cent of our patients are Aboriginal... And then I think the patients here... may have more complex needs... because of the special context in which we exist, and I do think it's an under resourced area here [for Indigenous people]... there's all of those things that come with being remote... if you've got poor literacy, poor education... economic problems as well..." (IHW02)*

Challenging circumstances noted, for example, by one Indigenous healthcare worker included the reality of housing insecurity and crowded living conditions experienced by many remote Indigenous patient-guardians. They highlighted how these dynamics can impact upon how medication is taken out of hospital.

---

<sup>1</sup> It is beyond the scope of this report to summarise Indigenous social and cultural determinants of health. For an overview of these please visit, [Australian Indigenous Health Info Net](http://australianindigenoushealthinfo.net).

1  
2  
3 *"...[the sheet] has a checklist of... what time to give the kids the antibiotics... A lot of our*  
4 *Indigenous people don't have their own home, they're living from place to place... so, things like*  
5 *keeping medication cool in the fridge is not always a possibility. And even... [having a] stable*  
6 *home life [to support medication being taken correctly]... Medication might say give it at a*  
7 *certain time... [but] they could have meals late in the evening because that's just when*  
8 *everything's settled down for the family... it's hard when I talk to mums and... they've always*  
9 *got family over..." (IWHO1)*  
10  
11

12 Indigenous healthcare workers noted the challenge of designing a 'one-size fits all' information sheet  
13 for Indigenous patient-guardians, acknowledging the inherent diversity among Aboriginal and Torres  
14 Strait Islander peoples, both culturally and socially. In particular, varying English literacy levels were  
15 considered a significant factor to accommodate when adapting the sheet.

16  
17 *"...not everyone has the same reading and writing abilities... I noticed when it comes to filling*  
18 *out forms [it can be] laboured and it's hard for them to even write their name... reading*  
19 *information will be the same, too overwhelming." (IHW01)*  
20

21 To this point, one Indigenous healthcare worker provided an overview of some of the target groups  
22 within the community that the sheet would need to be adapted for.

23  
24 *"Every community is different, every tribe is different, every individual is different with the*  
25 *Aboriginal people... you've got to work on your target group too because there's different kind*  
26 *of indigenous people... in this city... three stages or three different levels. [This sheet] would be*  
27 *okay for, what do we call them... uptown black fellas. For those that can read and write and*  
28 *went to school... and then... half of this would be okay for our suburban [black fellas] but, you*  
29 *know, you've got to put things in that the people identify with. And for our grass roots [black*  
30 *fellas]... you need to use words that they use and more pictures. So I don't know how you're*  
31 *going... to target three different indigenous groups." (IHW04)*  
32  
33

34 In accommodating this diversity, two Indigenous healthcare workers stated the importance of locally  
35 adapted information sheets, designed in consultation with local Aboriginal community representatives.

36  
37 *"...if you're basically rolling something out that's targeting our people, our people should be*  
38 *involved in the development of it..." (IHW02)*  
39

40  
41 *"...I would really like indigenous... people from this area involved in this. Like the healthcare*  
42 *workers, you know... [for] this the document that, you know, they're putting forth, we still need*  
43 *to have that consultation with the community... one elder or just [Aboriginal] people in general...*  
44 *that has an invested interest... in indigenous health." (IWH04)*  
45

46 Given the various social stressors that may be impacting Indigenous patient-guardian engagement with  
47 the sheet, one Indigenous healthcare worker stressed the importance of ensuring the sheet is easy to  
48 'consume' for Indigenous patient-guardians.

49  
50 *"...and if they've got other kids at home, if they've got other social things going on... we need to*  
51 *make it [is] as easy as possible... for people to consume it, make them want to consume it and*  
52 *make it quick to consume..." (IHW02)*  
53  
54

## 55 Adapting the content and design for Indigenous patient-guardian users

### 56 Content considerations

57 While nearly all Indigenous healthcare workers felt that major content changes were needed to  
58 increase the information sheet's appropriateness and accessibility for Indigenous patient-guardians, all  
59  
60

1  
2  
3 agreed that the messages conveyed in the sheet were highly relevant for informing Indigenous patient-  
4 guardians about their child's treatment.

5 *"I think that there is a need for – to expand people's health literacy and when people are in*  
6 *hospital if they're here for a period of time, that's an opportunity to expand people's*  
7 *understanding... so I think it's really quite good to have information like this... and I think it could*  
8 *be a very useful tool... not necessarily this sheet but the information on it I think is very useful*  
9 *and very relevant and I think it will better inform people..." (IHW02)*

10  
11  
12 *"it would be... useful information to know the side effects... like, why... it's [antibiotics are] not*  
13 *agreeing with them, like, what's happening, is it because he's not well or is it because of the*  
14 *drugs... it would be helpful for them [Indigenous guardians] to know that..." (IHW01)*

### 15 16 *Information heavy*

17 An opening comment made by most Indigenous healthcare workers concerned what they saw was too  
18 much information presented in the sheet.

19 *"I just thought it was just too much information, overwhelmingly so." (IHW01)*

20  
21  
22 *"I think that this might look a bit overwhelming and that [it] might be off putting because*  
23 *there's... four columns of text and... that's too much, and even if someone might understand it*  
24 *if they actually read it, they might not even get to that stage because they just go, no, this is too*  
25 *much information..." (IHW02)*

26  
27  
28 *"That's a lot of information on there... to take in... it's just too much information for me to read*  
29 *that" (IHW05)*

### 30 31 *Reducing to one page*

32 Most Indigenous healthcare workers felt strongly that the sheet would be more agreeable with  
33 Indigenous patient-guardians if it were reduced to one page instead of two. One Indigenous healthcare  
34 worker, however, felt that while one page would be ideal, it was not feasible to reduce the content  
35 without losing its integrity.

36 *"One page for sure." (IHW01)*

37  
38 *"Yeah, one page... with-with your... core information on it. Make it more compact..." (IHW05)*

39  
40  
41 *"I suspect a lot of patients with low literacy and numeracy are not going to be able to compute*  
42 *it and make the connections between one page to another... I think that a single sheet [is ideal*  
43 *as]... anyone is going to prefer to just read one sheet. [However] I think it probably needs to be*  
44 *two pages as much as one page would be nice... just to get the volume of information across."*  
45 *(IHW02)*

### 46 47 48 *Information to retain, exclude or add*

49 When asked what information was most important to include, one Indigenous healthcare worker stated  
50 the importance of including a general 'what, why and how' explanation of antibiotic use. As part of this,  
51 another stressed the importance of retaining information that educated about antibiotics and bacterial  
52 infections, along with why switching from IV to oral antibiotics occurred.

53  
54 *"They want to know what the antibiotic is going to do. Um, why they need to come in hospital,*  
55 *why they need to have it, what it's going to do to them and how it's going to fix them." (IHW04)*

56  
57 *"...I think the most important things to convey is that antibiotics are for bacterial infections and*  
58 *that when a child is well enough you switch them from IV to oral as appropriate." (IHW02)*

59  
60 On the topic of side-effects, one Indigenous healthcare worker spoke of the importance of the

1  
2  
3 information on side effects for clarifying why it is advantageous to make the switch, if appropriate.

4 *"I've had parents be like... can we give it through the drip? ...because in their minds, that's a*  
5 *better thing for their child is to have a needle as opposed to not having one, and that oral*  
6 *antibiotics might not be good enough... it highlights the [importance of including]... the more*  
7 *serious... [side]effects, such as allergically or anaphylactic reactions... I don't know that there's*  
8 *necessarily anything more that needs to be put on here...."* (IHW02)

9  
10  
11 Another Indigenous healthcare worker, however, shared several concerns about the side-effects  
12 information. On the one hand, they felt there was a need for greater clarification when distinguishing  
13 between oral and IV antibiotic side effects, yet they also felt the sheets statement that information  
14 about side-effects would be provided by hospital staff was sufficient alone. Furthermore, they stressed  
15 the distrust in Western medicine that some Indigenous peoples have, and cautioned that side-effects  
16 information could make Indigenous patient-guardians reluctant to give their child antibiotics at all.

17 *"...it's got here, what are the side effects of antibiotics and it's quite a big... spiel around that...*  
18 *I don't know if that, all that's really relevant... I was a bit confused with that... are you implying*  
19 *that these side effects are only... with oral antibiotics... I would [they would] have thought that*  
20 *the same [as IV]... because it's the same antibiotics as such."* (IHW03)

21 *"...you've also got there that... the hospital will make you aware of potential side effects*  
22 *treatment plans, options and the like. So, I thought that probably covered it enough in regards*  
23 *to the side effects."* (IHW03)

24 *"...a lot of... our mob is still kind of reluctant or, or scared of... White man's medicine... so it will*  
25 *probably have an adverse effect, having all that outlined when... being an Indigenous parent*  
26 *myself... Straight away it's [the side effects are] making me think I don't even want my kid to*  
27 *have antibiotics at all... So, yeah... I'd look at either really dramatically shortening that or getting*  
28 *rid of that part altogether."* (IHW03)

29  
30  
31 A few Indigenous healthcare workers highlighted some of the misconceptions held about how to take  
32 oral antibiotics and the need to finish a whole course, with one Indigenous healthcare worker sharing  
33 about her own experiences growing up. As such, they advised that information about antibiotic  
34 resistance and the need to complete a whole course be included.

35 *"The nurse would tell [my mother], this is what you've got to do with [with the antibiotics], and*  
36 *then that was it... we never finished our antibiotics, we always had a stash of antibiotics in the*  
37 *cupboard that we never finished... [so] educating – people do the whole course, even when kids*  
38 *are better, finish it, they need it... [because] as soon as we got better, [we thought] "I'm not*  
39 *taking it, I'm not sick."* (IHW01)

40 *"...something about antibiotic resistance might be useful because that's often the problem we*  
41 *have is that the child will complete half the course and the look better, so... the parents don't*  
42 *complete it..."* (IHW02)

43  
44  
45 Furthermore, one Indigenous healthcare worker stressed that it was important to acknowledge  
46 Indigenous peoples use of traditional medicines, yet to reinforce the importance of first trying Western  
47 medicine, along with how and why it will be helpful.

48 *"Tell them how sick... they are themselves and [how antibiotics are]... going to help you. You*  
49 *can use... your cultural medicines but you need to work the white man way first and then... if*  
50 *you're not satisfied there then do... your cultural medicines."* (IHW04)

### *Indigenous liaison officer's contact information*

Some Indigenous healthcare workers felt it was appropriate to include Indigenous liaison officer's contact details on the information sheet, although one did note the challenge of officers being under-resourced for providing appropriate support.

*"For sure... we all have work phones... and we have certain hours, so it wouldn't encroach on our – it's part of our job." (IHW01)*

*"I think that would be a good idea because... even though you hand it [the information sheet] to them, sometimes they don't read it properly." (IHW05)*

*"...you can put us down [contact details]... because a lot of people look for liaison officers for help... it's just unfortunate we don't have an office space where we can take our people to sit down and yarn with them about things like this." (IHW04)*

The Indigenous doctor (IHW02), however, raised a few concerns about including liaison officer's contact details, noting it could increase already over-stretched workloads, and cautioned that not all Indigenous healthcare workers were empowered to have the health literacy necessary to explain medical information.

*"...it might increase their workload with a bunch of things that aren't actually their job... I think it also depends on... the person [liaison officer] as well... they might be not the greatest equipped to explain health information because... I don't think... we empower [them] to have great health literacy... [and therefore] they deskill and then that benefit is not passed on to the patient." (IHW02)*

### *Adapting language*

All Indigenous healthcare workers discussed the importance simplifying and adapting the language used in the information sheet to better accommodate the cultural and English literacy needs of Indigenous patient-guardians in order to increase the appropriateness and accessibility of the sheet.

*"...you've also got to talk the way they talk... [do not use] words that they would never use, that they don't understand, so you have to put it in words that they know..." (IHW04)*

Critically, Indigenous healthcare workers highlighted several examples of words that they felt were inaccessible to a lot of Indigenous patient-guardians, along with examples for how language could be simplified or culturally adapted to be more appropriate.

*"And what's this word at the top here [intravenous]?... Some people mightn't know what that word means to start with." (IHW05)*

*"And like you've got 'infections', they don't know what infection means. It's a sickness... you're using big words, you know. Like you've got infection, absorbing medicines, antibiotics, you know, special criteria's, body temperatures... You've got to say... hot or cold... [For] medication... [you could say] tablets, capsules.... oral stuff, intravenous, you know. They don't know those words." (IHW04)*

*"...some parents would be like, what's probiotics? So, [you need to explain what that is] yogurt drinks, Yakult, stuff like that, it would be handy that information because that's something they could just go to the store and get." (IHW01)*

*"...[use culturally appropriate words] to make it more... relatable, most definitely in regards to, you know, a child is jarjum, and things like that, and mob instead of family... those little things will help make it a lot more relatable for our mob." (IHW03)*



Furthermore, one Indigenous healthcare worker noted the importance of using terms consistently across the two pages.

*"...where it said IV or intravenously and said through a drip and then later in the sheet it goes on to say give IV antibiotics. I suspect some of my patients don't really connect it later on when it says IV antibiotics even though earlier... it's stated that it's IV..." (IHW02)*

### Visual representation of the content

Finally, all Indigenous healthcare workers emphasised the need for visual representation of the sheet's content to make it more appealing and accessible to Indigenous patient-guardians.

*"I think Aboriginal people are generally a lot more visual, ah, and I think the population I'm often dealing with are a lot more visual and fewer words. I think a lot of points could probably be illustrated, with pictures and captions, as opposed to paragraphs of words... and I think... that that is missing here" (IHW02)*

*"That way if their reading is not good at least they have a visual aid to help them remind them." (IHW01)*

### Design considerations

Closely connected to the call for visual representation of text, the most prominent feedback for the design of the information sheet was for visual representation of Aboriginal and Torres Strait Islander peoples through art, flags, use of colours, and images. In doing so, Indigenous healthcare workers felt the sheet would be identifiable and more appealing to Indigenous patient-guardians. Recommendations are summarised in the following:

- Incorporating Indigenous art:  
*"And obviously having some artwork across it... to make it identifiable... for our mob" (IHW03)*
- Including both the Aboriginal and Torres Strait Islander flags:  
*"I just think that you need to just probably put the flags on and acknowledge... both cultures [Aboriginal and Torres Strait Islander peoples]." (IHW04)*  
*"...you'd need the [Aboriginal and Torres Strait Islander] flags on there, you know what I mean?... to acknowledge that it's Indigenous." (IHW05)*
- Using colours that Indigenous peoples can identify with:  
*"...looking at this green, this is very much a hospital kind of green... I think it's better to have [colours] that are more stimulating... I'm very biased towards oranges and yellows and reds... there is very much this idea of the Aboriginal colours and they are stereotypical Aboriginal colours but I think that might exist for a reason." (IHW02)*  
*"What are the colours [to use]? Aboriginal people, red, black and yellow... You know we have islander people here as well, Torres Strait Islanders... I'm not sure how you're going to get around it putting both lots of, um, cultures in the one pamphlet." (IHW04)*
- Including images that represent Indigenous peoples and their inherent diversity:  
*"I think it's really important to acknowledge that... the Aboriginal population has a wide variation in what people look like, and so there's people that look very Caucasian, people who look very Asian, I've got friends who look African Aboriginal... when choosing images and graphics, [ensure] you're choosing images that people can identify [with]... sometimes I think... [illustrations and/or cartoons] they're almost better than... real people... because if you look at a... photo [you might think] well I don't really identify with that... if you're choosing... skin tone..."*

1  
2  
3 choose multiple [tones] or you can choose someone who sits kind of in the middle who is kind  
4 of brown but not black and not white..." (IHW02)  
5

6 Finally, to Indigenous healthcare workers recommended that the sheet's overall design be simple,  
7 refraining from clutter.  
8

9 "...[design it so that] you look at it and it's not, like, a bunch of writing slapping you in the face,  
10 it's just simple." (IHW01)  
11

12 "...just keep it... [so that] your eyes are visually drawn to one point and then the next point... without  
13 having too much artwork or anything like that, so maybe a picture, point, picture, point, picture,  
14 point... Whereas even looking at this now, it's just too full of words..." (IHW01)  
15

### 16 *Examples of appropriate Indigenous medical information sheets*

17 Several examples of well-designed Indigenous patient medical information materials were noted by  
18 Indigenous healthcare workers as being appropriate for Indigenous patients.  
19

- 20 • Aboriginal and Torres Strait Islander Asthma Action Plan materials
- 21 • Aboriginal and Torres Strait Islander antenatal materials
- 22 • Aboriginal immunisation information materials
- 23 • Closing The Gap health information templates
- 24

### 25 *Considerations for supporting Indigenous patient-guardian uptake of the information sheet*

26 When asked about the likelihood of Indigenous patient-guardians reading the information sheet, mixed  
27 responses were received. Some Indigenous healthcare workers felt it would be unlikely, noting a strong  
28 preference for the oral transfer of medical information through, for example, 'bedside yarning'. Others  
29 highlighted the sheets utility for reinforcing information, and stressed the benefit of repetition for  
30 instilling knowledge.  
31

32 "...well if there's anything we go in and talk to them and ask them what they – do they  
33 understand. It's by word of mouth, like bedside yarning if you want to call it, um, and ask them  
34 do they understand. Um, and that's why they have liaison officers employed to translate all the  
35 stuff..." (IHW04)  
36

37 "They're better off just hearing it... Yeah, I think it will just get rolled up, put in the back pocket  
38 and then at a convenient time just chucked in the bin... because 'the doctor already told me,  
39 and I remembered that'." (IHW01)  
40

41 "...[it is useful] as something to refer to and to give the patient afterwards so that they've got  
42 something to refer to after that conversation or to keep it in their brain..." (IHW02)  
43

44 "I reckon all of it [using conversation and the information sheet], like, they say repetition for  
45 emphasis..." (IHW01)  
46

47 Several recommendations were made for supporting Indigenous patient-guardians uptake of the sheet.  
48 As previously mentioned, IHW04 stressed the importance of accommodating the range of English  
49 literacy levels found among Indigenous patient-guardians. To this point, one Indigenous healthcare  
50 worker distinguished when it would be more appropriate to use a simplified and Indigenous specific  
51 sheet or the mainstream/general sheet.  
52

53 "...I wouldn't necessarily give that to an Aboriginal patient just because they're Aboriginal but  
54 [rather] if... English is not their first language or... I think they're going to grasp things  
55 differently... [I would provide the Indigenous specific sheet]. [If] they're understanding  
56 everything I'm saying, which we have a wide variation in our community, I would probably give  
57 them... the mainstream [information]". (IHW02)  
58  
59  
60



1  
2  
3 The prioritisation of conversation to aid in the delivery of the sheet was considered critical by all  
4 Indigenous healthcare workers for supporting Indigenous patient-guardian uptake.

5 *"You need to explain things to our mob... show them that this is what's going to happen... Our*  
6 *mob won't walk around with paper... if you changed a lot of the information in here to suit your*  
7 *target, [then] I can assist by reading you know, when they come into hospital... a healthcare*  
8 *worker can do the same thing... because our mob won't sit there and read it, they'll throw it*  
9 *out."* (IHW04)  
10  
11

12 *"...if this sheet was just sitting on a wall and people were just to get it without any conversation*  
13 *I don't think it's useful but what I think is useful is if there's a conversation to explain why we do*  
14 *something..."* (IHW02)  
15

16 Finally, one Indigenous liaison officer felt that it could be appropriate to provide the sheet in the  
17 standard information pack that Indigenous patient-guardians would receive upon arrival to the hospital.

18 *"...we generally give out to all new clients a... Aboriginal and Torres Strait Islander Hospital*  
19 *Liaison Officer resource pack... it could be something that we could... put into... that pack..."*  
20 *(IHW03)*  
21  
22  
23  
24  
25  
26  
27  
28  
29  
30  
31  
32  
33  
34  
35  
36  
37  
38  
39  
40  
41  
42  
43  
44  
45  
46  
47  
48  
49  
50  
51  
52  
53  
54  
55  
56  
57  
58  
59  
60

**SUMMARY: RECOMMENDATIONS FOR CULTURALLY APPROPRIATE PATIENT-GUARDIAN INFORMATION**

|                                                      |                                                                                                                                                                                                                                                                                                                                                                                                                                                                                                                                                                                                                                                                                                                                                                                                                                                                                                                                                                                                                                                                                                                                                                                                                                                                                                                                                                                                                                                                                                                                                                                                                                                                                                                                                                                                                                                                                                                                                                               |
|------------------------------------------------------|-------------------------------------------------------------------------------------------------------------------------------------------------------------------------------------------------------------------------------------------------------------------------------------------------------------------------------------------------------------------------------------------------------------------------------------------------------------------------------------------------------------------------------------------------------------------------------------------------------------------------------------------------------------------------------------------------------------------------------------------------------------------------------------------------------------------------------------------------------------------------------------------------------------------------------------------------------------------------------------------------------------------------------------------------------------------------------------------------------------------------------------------------------------------------------------------------------------------------------------------------------------------------------------------------------------------------------------------------------------------------------------------------------------------------------------------------------------------------------------------------------------------------------------------------------------------------------------------------------------------------------------------------------------------------------------------------------------------------------------------------------------------------------------------------------------------------------------------------------------------------------------------------------------------------------------------------------------------------------|
| <b>Indigenous consultation</b>                       | <ul style="list-style-type: none"> <li>• In creating a culturally appropriate information sheet, ensure that there has been appropriate consultation with local Indigenous peoples who have a vested interest in Indigenous health</li> </ul>                                                                                                                                                                                                                                                                                                                                                                                                                                                                                                                                                                                                                                                                                                                                                                                                                                                                                                                                                                                                                                                                                                                                                                                                                                                                                                                                                                                                                                                                                                                                                                                                                                                                                                                                 |
| <b>Content</b>                                       | <ul style="list-style-type: none"> <li>• Reduce the amount of text so it is less overwhelming</li> <li>• Consider if the sheet can be reduced to one page without losing the integrity of the content</li> <li>• Ensure that a general ‘what, why and how’ explanation of antibiotic use is covered</li> <li>• Retain information about when a switch from IV to oral antibiotics is appropriate and why it is beneficial</li> <li>• Consider a different approach to the side effects section: provide greater clarification between IV and oral antibiotics or take out the section, leaving only the statement explaining how hospital staff will provide information about possible side-effects.</li> <li>• Provide information about antibiotic resistance and the need to complete a whole course</li> <li>• Acknowledge the place of traditional medicine, yet reinforce the importance of trying Western medicine first.</li> <li>• Try to include Indigenous liaison officer contact details. However, consider the local capacity of the officers before making this decision.</li> <li>• Simplify and culturally adapt the language in the sheet to reflect the English literacy levels and language used by Indigenous patient-guardians. For example: <ul style="list-style-type: none"> <li>○ Consider finding alternative words for: intravenous, antibiotics, infections (to sickness), oral medicine (to tablets), absorbing medicines, temperatures (to hot or cold),</li> <li>○ Explain what probiotics are and how they are found in products like: yogurt and Yakult.</li> <li>○ Use culturally appropriate words to make the text more relatable, i.e. child to local words like jarjum (south-east Queensland), family to mob.</li> </ul> </li> <li>• Use terms for intravenous consistently across the two pages.</li> <li>• Accommodate Indigenous peoples’ preference for visual learning by visually representing text where possible.</li> </ul> |
| <b>Design</b>                                        | <ul style="list-style-type: none"> <li>• Provide visual representation of Aboriginal and Torres Strait Islander peoples through: art, Indigenous flags, Indigenous inspired colours that accommodate Aboriginal and Torres Strait Islander diversity, and ensure appropriately skin-toned drawings or cartoons of people that reflect the diversity of Indigenous peoples.</li> <li>• Ensure that the design is simple and not cluttered</li> <li>• Consider drawing inspiration from the Indigenous medical information materials</li> </ul>                                                                                                                                                                                                                                                                                                                                                                                                                                                                                                                                                                                                                                                                                                                                                                                                                                                                                                                                                                                                                                                                                                                                                                                                                                                                                                                                                                                                                                 |
| <b>Supporting Indigenous patient-guardian uptake</b> | <ul style="list-style-type: none"> <li>• Try to accommodate a range of English literacy levels (i.e. use the mainstream/general information sheet for those with high English literacy)</li> <li>• Prioritise conversation when delivering the sheet to Indigenous patient-guardian to support understanding and allow for questions to be asked.</li> </ul>                                                                                                                                                                                                                                                                                                                                                                                                                                                                                                                                                                                                                                                                                                                                                                                                                                                                                                                                                                                                                                                                                                                                                                                                                                                                                                                                                                                                                                                                                                                                                                                                                  |

- Consider asking Indigenous liaison officers if they would include the sheet in their information packages for Indigenous patient and carer arrivals to the hospital

### Barriers to uptake

As noted towards the beginning of this report, the cultural and social contexts within which Indigenous patient-guardian engagement with medical information occurs in regional and rural Queensland present significant complexities and barriers for information uptake. As Indigenous healthcare workers have indicated, these must be considered when determining how to best adapt and deliver the information sheet to Indigenous patient-guardians. Furthermore, throughout the report several barriers that touched upon socio-cultural, literacy, and Indigenous staff complexities were discussed, which may impact Indigenous patient-guardian uptake of the information sheet (see below for a summary of these).

In addition these, Indigenous healthcare workers noted further barriers to Indigenous patient-guardians uptake of the sheet. Specifically, one Indigenous healthcare worker highlighted the time-poor working conditions of healthcare workers as an impediment to ensuring adequate discussion about patient treatment plans.

*"I think that dialogue between patient and health practitioner is really important... [However] as a health practitioner sometimes you just do not have time..." (IHW02)*

Another Indigenous healthcare worker felt that healthcare workers did not always communicate in a way that Indigenous peoples could understand.

*"...when you ask them [Indigenous patients and carers], what they [understood], they just say no... Because it's not explained to them properly... [Not in] the way they talk... They [healthcare workers] use a lot of jargon, you know... sometimes we don't understand what they say... they don't really explain things clearly to us." (IHW05)*

Finally, the reality of a fast-paced work environment with high staff turnover was considered a challenge for ensuring that staff remain aware of the information sheet.

*"...things are pretty busy... so it's quite easy for something that we've put down two weeks ago to be covered and stuff, let alone 12 months ago..." (IHW01)*

*"if we're introducing a sheet like this to educate about antibiotics... who is going to deliver it?... staff get changed so often and things do move rapidly, and things can get lost." (IHW02)*

### SUMMARY: BARRIERS TO UPTAKE

- There is a reality of low English and Western health literacy held by many remote Indigenous patient guardians.
- A commonly held preference by Indigenous peoples is for the oral transfer of information as opposed to acquiring information through written text.
- The inherent diversity that exists between the many Indigenous nations and peoples across the state presents a challenge for designing an information sheet that could appropriately meet the diverse needs of Indigenous patient-guardians
- Indigenous patient-guardians may have misconceptions about how oral antibiotics need to be taken, leading to common occurrences of infection relapses and heightened risk of antibiotic resistance.

- Some Indigenous patient-guardians may lack trust in 'white man's medicine', with some preferring to utilise 'black fella medicine' before considering Western medicine.
- While Indigenous liaison officer's aide Indigenous patient-guardians in navigating their stay in hospital, they are often grossly under-resourced and overstretched in their work roles and therefore may not have adequate time to translate the sheet for Indigenous patient-guardians.
- Indigenous liaison officers are not always empowered with appropriate health literacy to translate medical information, which may impact on their capacity to aide Indigenous patient-guardians.
- The time-poor working conditions of healthcare workers can be an impediment for ensuring adequate discussion about patient treatment plans.
- Healthcare workers may not always communicate in a way that Indigenous peoples can understand.
- High staff turnover may be a challenge for ensuring staff remain aware of the information sheet.

### Part 3 Summary

Significant changes to the content and design of the information sheet will be required to optimise the material's appropriateness and accessibility to Indigenous patient-guardians. Creating a sheet that is responsive to the cultural and social contexts within which Indigenous patient-guardians will engage with the information is an important starting point. Central to this will be designing with diversity in mind and accommodating Indigenous visual and oral learning preferences. In adapting the content, it is important that the text 'talks the talk' of its users, reflecting appropriate English literacy levels and incorporating Indigenous cultural terms. Ensuring that the design visually reflects Indigenous diversity through its use of colour, art and images will enable different Indigenous patient-guardians to identify with the sheet. Further to content and design changes, it was stressed that the way in the material is delivered to Indigenous patient-guardians will strongly influence its uptake. Here, the need to accommodate Indigenous oral learning through 'bedside yarning' was considered paramount.

While a series of practical recommendations were made to guide the material's adaption, Indigenous healthcare workers identified several barriers to its uptake resulting from: social inequities, cultural differences, Indigenous patient-guardian misinformation, the under-resourcing of Indigenous services, and the time-poor working conditions of healthcare workers to accommodate Indigenous patient-guardian needs.

Finally, to ensure the material is appropriate and responsive to the needs of local Indigenous patient-guardians it may be important that further consultation occurs with Indigenous peoples who have a vested interest in their people's health.

## COREQ (CONsolidated criteria for REporting Qualitative research) Checklist

A checklist of items that should be included in reports of qualitative research. You must report the page number in your manuscript where you consider each of the items listed in this checklist. If you have not included this information, either revise your manuscript accordingly before submitting or note N/A.

| Topic                                          | Item No. | Guide Questions/Description                                                                                                                              | Reported on Page No. |
|------------------------------------------------|----------|----------------------------------------------------------------------------------------------------------------------------------------------------------|----------------------|
| <b>Domain 1: Research team and reflexivity</b> |          |                                                                                                                                                          |                      |
| <i>Personal characteristics</i>                |          |                                                                                                                                                          |                      |
| Interviewer/facilitator                        | 1        | Which author/s conducted the interview or focus group?                                                                                                   |                      |
| Credentials                                    | 2        | What were the researcher's credentials? E.g. PhD, MD                                                                                                     |                      |
| Occupation                                     | 3        | What was their occupation at the time of the study?                                                                                                      |                      |
| Gender                                         | 4        | Was the researcher male or female?                                                                                                                       |                      |
| Experience and training                        | 5        | What experience or training did the researcher have?                                                                                                     |                      |
| <i>Relationship with participants</i>          |          |                                                                                                                                                          |                      |
| Relationship established                       | 6        | Was a relationship established prior to study commencement?                                                                                              |                      |
| Participant knowledge of the interviewer       | 7        | What did the participants know about the researcher? e.g. personal goals, reasons for doing the research                                                 |                      |
| Interviewer characteristics                    | 8        | What characteristics were reported about the interviewer/facilitator? e.g. Bias, assumptions, reasons and interests in the research topic                |                      |
| <b>Domain 2: Study design</b>                  |          |                                                                                                                                                          |                      |
| <i>Theoretical framework</i>                   |          |                                                                                                                                                          |                      |
| Methodological orientation and Theory          | 9        | What methodological orientation was stated to underpin the study? e.g. grounded theory, discourse analysis, ethnography, phenomenology, content analysis |                      |
| <i>Participant selection</i>                   |          |                                                                                                                                                          |                      |
| Sampling                                       | 10       | How were participants selected? e.g. purposive, convenience, consecutive, snowball                                                                       |                      |
| Method of approach                             | 11       | How were participants approached? e.g. face-to-face, telephone, mail, email                                                                              |                      |
| Sample size                                    | 12       | How many participants were in the study?                                                                                                                 |                      |
| Non-participation                              | 13       | How many people refused to participate or dropped out? Reasons?                                                                                          |                      |
| <i>Setting</i>                                 |          |                                                                                                                                                          |                      |
| Setting of data collection                     | 14       | Where was the data collected? e.g. home, clinic, workplace                                                                                               |                      |
| Presence of non-participants                   | 15       | Was anyone else present besides the participants and researchers?                                                                                        |                      |
| Description of sample                          | 16       | What are the important characteristics of the sample? e.g. demographic data, date                                                                        |                      |
| <i>Data collection</i>                         |          |                                                                                                                                                          |                      |
| Interview guide                                | 17       | Were questions, prompts, guides provided by the authors? Was it pilot tested?                                                                            |                      |
| Repeat interviews                              | 18       | Were repeat interviews carried out? If yes, how many?                                                                                                    |                      |
| Audio/visual recording                         | 19       | Did the research use audio or visual recording to collect the data?                                                                                      |                      |
| Field notes                                    | 20       | Were field notes made during and/or after the interview or focus group?                                                                                  |                      |
| Duration                                       | 21       | What was the duration of the interviews or focus group?                                                                                                  |                      |
| Data saturation                                | 22       | Was data saturation discussed?                                                                                                                           |                      |
| Transcripts returned                           | 23       | Were transcripts returned to participants for comment and/or                                                                                             |                      |

| Topic                                  | Item No. | Guide Questions/Description                                                                                                        | Reported on Page No. |
|----------------------------------------|----------|------------------------------------------------------------------------------------------------------------------------------------|----------------------|
|                                        |          | correction?                                                                                                                        |                      |
| <b>Domain 3: analysis and findings</b> |          |                                                                                                                                    |                      |
| <i>Data analysis</i>                   |          |                                                                                                                                    |                      |
| Number of data coders                  | 24       | How many data coders coded the data?                                                                                               |                      |
| Description of the coding tree         | 25       | Did authors provide a description of the coding tree?                                                                              |                      |
| Derivation of themes                   | 26       | Were themes identified in advance or derived from the data?                                                                        |                      |
| Software                               | 27       | What software, if applicable, was used to manage the data?                                                                         |                      |
| Participant checking                   | 28       | Did participants provide feedback on the findings?                                                                                 |                      |
| <i>Reporting</i>                       |          |                                                                                                                                    |                      |
| Quotations presented                   | 29       | Were participant quotations presented to illustrate the themes/findings?<br>Was each quotation identified? e.g. participant number |                      |
| Data and findings consistent           | 30       | Was there consistency between the data presented and the findings?                                                                 |                      |
| Clarity of major themes                | 31       | Were major themes clearly presented in the findings?                                                                               |                      |
| Clarity of minor themes                | 32       | Is there a description of diverse cases or discussion of minor themes?                                                             |                      |

Developed from: Tong A, Sainsbury P, Craig J. Consolidated criteria for reporting qualitative research (COREQ): a 32-item checklist for interviews and focus groups. *International Journal for Quality in Health Care*. 2007. Volume 19, Number 6: pp. 349 – 357

**Once you have completed this checklist, please save a copy and upload it as part of your submission. DO NOT include this checklist as part of the main manuscript document. It must be uploaded as a separate file.**
