# Supplementary material for: Improving paediatric antimicrobial stewardship in remote and regional Queensland hospitals: development and qualitative evaluation of a tailored intervention for intravenous-to-oral antibiotic switching
Source: PubMed Central journal article supplement — BMJ Open. 2022 Dec 26;12(12):e064888. doi: 10.1136/bmjopen-2022-064888 (PMC9806007; doi:10.1136/bmjopen-2022-064888), 2022-12-26
Supplement: bmjopen-2022-064888supp002.pdf [file bmjopen-2022-064888supp002.pdf]

#### IV to oral conversion study: PHASE 2 pre-intervention review of materials

| Themes                                                                                              | Healthcare worker questions (concerning the fact sheet, patient chart labels, ?STOP chart & lanyards)                                                                                                                                                                                                                                                                                       | Patient guardian questions (concerning the guardian information sheet)                                                                                                                                                                                                                                                                                                                                                                                       |
|-----------------------------------------------------------------------------------------------------|---------------------------------------------------------------------------------------------------------------------------------------------------------------------------------------------------------------------------------------------------------------------------------------------------------------------------------------------------------------------------------------------|--------------------------------------------------------------------------------------------------------------------------------------------------------------------------------------------------------------------------------------------------------------------------------------------------------------------------------------------------------------------------------------------------------------------------------------------------------------|
| <b>Quality of content:</b><br>comprehension and relevance                                           | <ul style="list-style-type: none"> <li>- What do you think the message being conveyed in the materials is about?</li> <li>- How do you think the information presented would aid your decision-making regarding antibiotic therapy?</li> <li>- How is the information relevant to your practice in administrating IV antibiotics to children?</li> </ul>                                    | <ul style="list-style-type: none"> <li>-What do you think the message in this information sheet is trying to tell you?</li> <li>- Would this information help you to understand or make a decision regarding your child's switch from IV to oral antibiotics?</li> </ul>                                                                                                                                                                                     |
| <b>Effectiveness of design:</b><br>style, layout, use of visual cues (arrows, boxes, bold headings) | <ul style="list-style-type: none"> <li>- How effective is the overall design of the materials?               <ul style="list-style-type: none"> <li>- any comments regarding the style, layout or use of visual cues in the materials (such as boxes, arrows, headings)?</li> </ul> </li> </ul>                                                                                             | <ul style="list-style-type: none"> <li>- What are your thoughts about the appearance of the information sheet?               <ul style="list-style-type: none"> <li>-any feedback about the style, layout and use of pictures in the sheet?</li> </ul> </li> </ul>                                                                                                                                                                                           |
| <b>Useability:</b> perceptions of usefulness in daily practice                                      | <ul style="list-style-type: none"> <li>- Would you use the materials in your daily practice? And why or why not?</li> <li>- Are there materials that you would prefer to use over others? Can you tell me which ones and why?</li> <li>- Do you think members of your healthcare team (i.e. nurses, doctors, pharmacists) would use the materials? Who in particular and why so?</li> </ul> | <ul style="list-style-type: none"> <li>- How would this information sheet be useful to you?</li> <li>- Would you normally take the time to read through information like this? Why so?</li> <li>- Would your attention to this sheet be different when your child is ill? How so?</li> <li>- How would you like this information sheet to be given to you? (i.e. explained in-person by your healthcare worker, given time to read alone) Why so?</li> </ul> |
| <b>Further comments:</b>                                                                            | <ul style="list-style-type: none"> <li>- Do you have any further comments you would like to share about the materials we have discussed?</li> </ul>                                                                                                                                                                                                                                         | <ul style="list-style-type: none"> <li>- Do you have any further comments you would like to share about the information sheet?</li> </ul>                                                                                                                                                                                                                                                                                                                    |

\*Questions adapted from the following sources:

- The Patient Education Materials Assessment Tool (PEMAT) and User's Guide An Instrument To Assess the Understandability and Actionability of Print and Audiovisual Education Materials (Version 1.0), 2014.
- Farrell-Miller, P. and Gentry, P. 1989. How effective are your patient education materials? Guidelines for developing and evaluating written education materials. *Diabetes Educator*, vol 15, no. 5, pp. 418-422.

## IV to oral conversion study: PHASE 4 post-intervention

### BACKGROUND

Firstly, I just want to get an idea of your role and which hospital you're working at. So could you briefly tell me the hospital where you used the materials, your position there and your length of employment?— i.e., (junior?) doctor, nurse, pharmacist, etc- are they a consultant?

### PART A Comprehension and relevance

1. Thinking about the materials you used and had access to, do you think the information presented aided your decision-making regarding antibiotic therapy?
  - a. Did you think the message and relevance was conveyed clearly in the materials?
  - b. Which formats did you find most useful and why/why not?
2. Did you find the patient/carer leaflet or video helpful in providing information to patients and their families?
  - a. Why/why not?
3. Were there any difficulties in reading comprehension or barriers to using the leaflet or the educational video?
  - a. How could it be improved?

### PART B Design: style, layout, use of visual cues (arrows, boxes, bold headings)

4. Do you remember where your interventions such as poster, flow chart and guidelines were located (i.e., on the ward and or via intranet) if you needed to refer to them?
  - a. Poster on the wall – was it easy to see among all other wall posters; Poster/flow chart/guidelines in medication chart easy to see?; and yellow stickers displayed in the medication chart?
5. Was the overall design of the materials effective in assisting with decision making?
  - a. any comments regarding the style, layout or use of visual cues in the materials (such as boxes, arrows, headings)?

### PART C Daily practice

6. How often did you use the materials in your daily practice? And why or why not?
7. Has using these materials changed your practice?
8. Were there any changes in prompts to assess antibiotic therapy from other healthcare team members since using this intervention?
  - a. How did they change? Type of prompt, frequency etc.

### PART D Support

9. Was there enough support provided to implement the program?
  - a. What was helpful/unhelpful
10. Is there anything you would want/need to keep using these materials in future?
11. Do you have any suggestions to improve future uptake or scalability of the program?

### PART E Further comments

12. Finally, do you have any further comments you would like to share about the materials we have discussed?
